# Supplementary material for: Cycloaddition mechanisms of CO2 and epoxide catalyzed by salophen – an organocatalyst free from metals and halides
Source: Royal Society of Chemistry journal article supplement (doi:10.1039/d0cy02256j), 2021-01-01
Supplement: d0cy02256j1.pdf [file d0cy02256j1.pdf]

## Supplementary information

### Cycloaddition Mechanisms of CO<sub>2</sub> and Epoxide Catalyzed by Salophen – A Organo-catalyst free from Metals and Halides

Cai-Hong Guo,<sup>\*a</sup> Min Liang,<sup>a</sup> and Haijun Jiao<sup>\*b</sup>

(a) Dr. Caihong Guo; Min Liang;

Key Laboratory of Magnetic Molecules and Magnetic Information Materials (Ministry of Education), School of Chemistry and Material Science, Shanxi Normal University, Linfen 041004, China. E-mail: sxgch2006@163.com;

(b) Dr. Haijun Jiao

Leibniz-Institut für Katalyse e.V. an der Universität Rostock, Albert-Einstein-Straße 29a, Rostock, 18059, Germany. E-Mail: haijun.jiao@catalysis.de

#### TABLE OF CONTENTS

|                                                                                                                                  |    |
|----------------------------------------------------------------------------------------------------------------------------------|----|
| <b>Table S1</b> The geometric parameters of optimized catalyst <b>1</b> were compared with the experimental molecular structure. | S2 |
| <b>Fig. S1</b> Geometric parameters of catalyst <b>1</b> and its two isomers.                                                    | S2 |
| <b>Table S2</b> Comparison of thermodynamic data of catalyst <b>1</b> and its two isomers.                                       | S2 |
| <b>Fig. S2</b> Free energy profile for the dihydroxy stepwise pathway.                                                           | S3 |
| <b>Fig. S3</b> Optimized structures of transition states involved in the dihydroxy stepwise pathway.                             | S3 |
| <b>Fig. S4</b> Optimized structures involved in the epichlorohydrin ring-opening via the <i>cis</i> -configuration pathway.      | S4 |
| Cartesian coordinates of structures at B3LYP/6-311g(d,p) level                                                                   | S5 |

**Table S1** The geometric parameters of optimized catalyst **1** were compared with the experimental molecular structure.

| bond length                    | X-ray | B3LYP | M06-2X | bond angle                                     | X-ray  | B3LYP  | M06-2X |
|--------------------------------|-------|-------|--------|------------------------------------------------|--------|--------|--------|
| C <sub>1</sub> -N <sub>1</sub> | 1.412 | 1.403 | 1.405  | C <sub>1</sub> -N <sub>1</sub> -C <sub>2</sub> | 121.39 | 121.13 | 120.15 |
| C <sub>2</sub> -N <sub>1</sub> | 1.286 | 1.289 | 1.281  | N <sub>1</sub> -C <sub>2</sub> -C <sub>3</sub> | 120.42 | 122.40 | 122.21 |
| O <sub>1</sub> -H <sub>1</sub> | 0.970 | 0.992 | 0.984  | C <sub>4</sub> -O <sub>1</sub> -H <sub>1</sub> | 105.70 | 107.42 | 108.04 |
| C <sub>5</sub> -N <sub>2</sub> | 1.413 | 1.403 | 1.405  | C <sub>5</sub> -N <sub>2</sub> -C <sub>6</sub> | 122.70 | 121.15 | 120.06 |
| C <sub>6</sub> -N <sub>2</sub> | 1.286 | 1.289 | 1.280  | N <sub>2</sub> -C <sub>6</sub> -C <sub>7</sub> | 121.05 | 122.40 | 122.24 |
| O <sub>2</sub> -H <sub>2</sub> | 1.000 | 0.991 | 0.983  | C <sub>8</sub> -O <sub>2</sub> -H <sub>2</sub> | 102.60 | 107.50 | 108.14 |

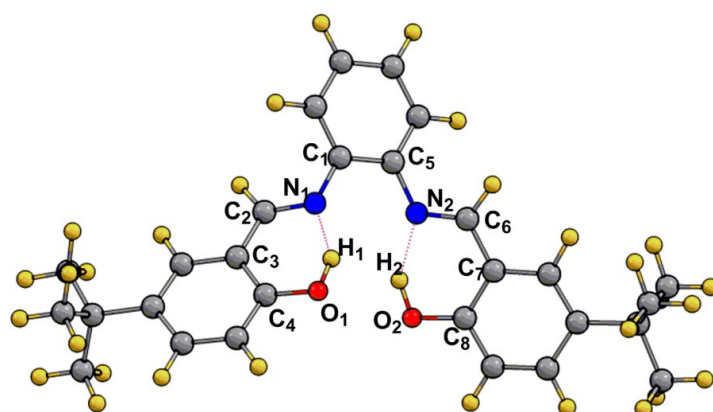

**Fig. S1** Geometric parameters of catalyst **1** and its two isomers.

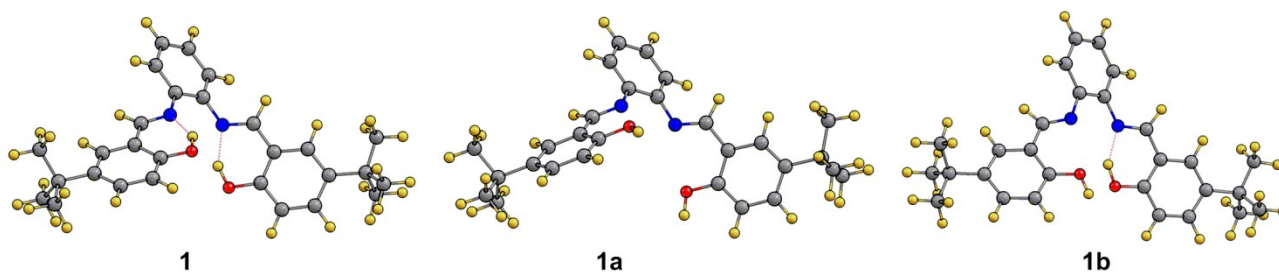

**Table S2** Comparison of thermodynamic data of catalyst **1** and its two isomers.

| Organocatalysts | HF(Hartree)  | G(Hartree)   | H(Hartree)   | $\Delta G(\text{kcal/mol})$ |
|-----------------|--------------|--------------|--------------|-----------------------------|
| <b>1</b>        | -1346.870622 | -1346.395641 | -1346.301821 | 0.0                         |
| <b>1a</b>       | -1346.825422 | -1346.354015 | -1346.257498 | 26.1                        |
| <b>1b</b>       | -1346.850031 | -1346.378032 | -1346.28193  | 11.1                        |

**Fig. S2** Free energy profile for the dihydroxy stepwise pathway.

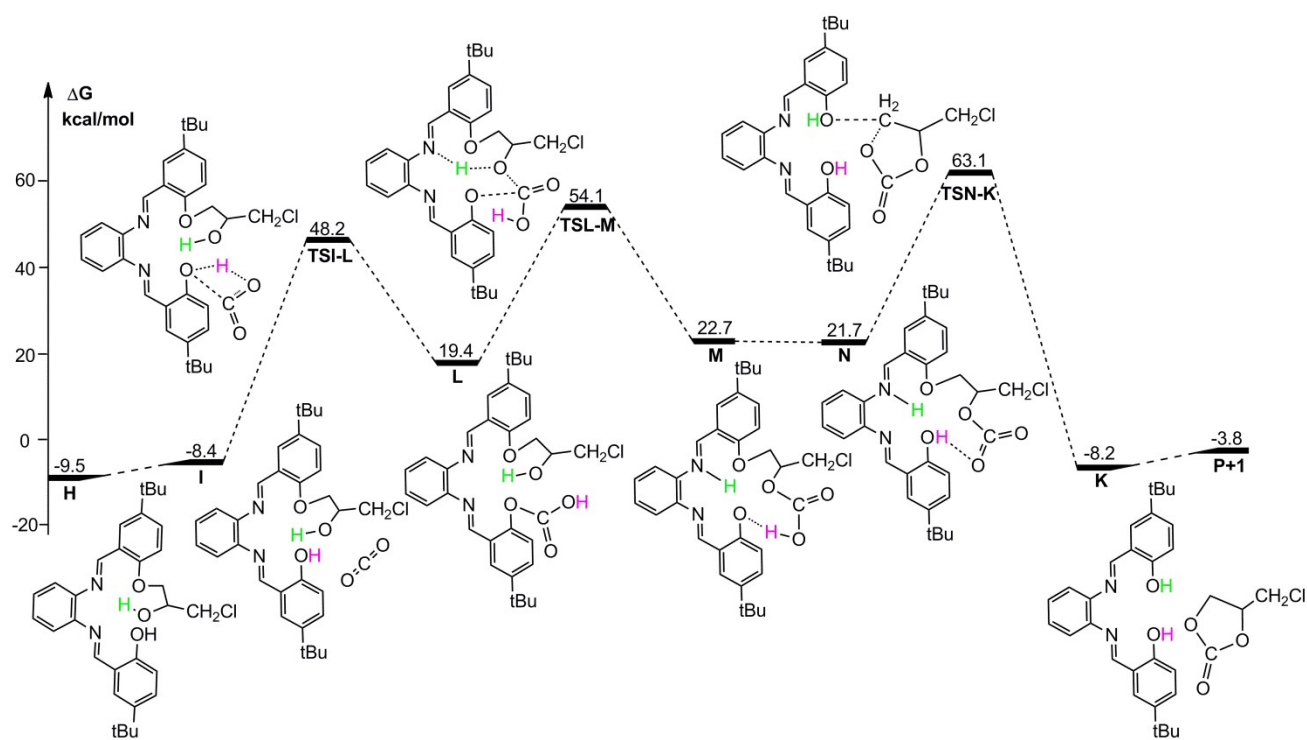

**Fig. S3** Optimized structures of transition states involved in the dihydroxy stepwise pathway.

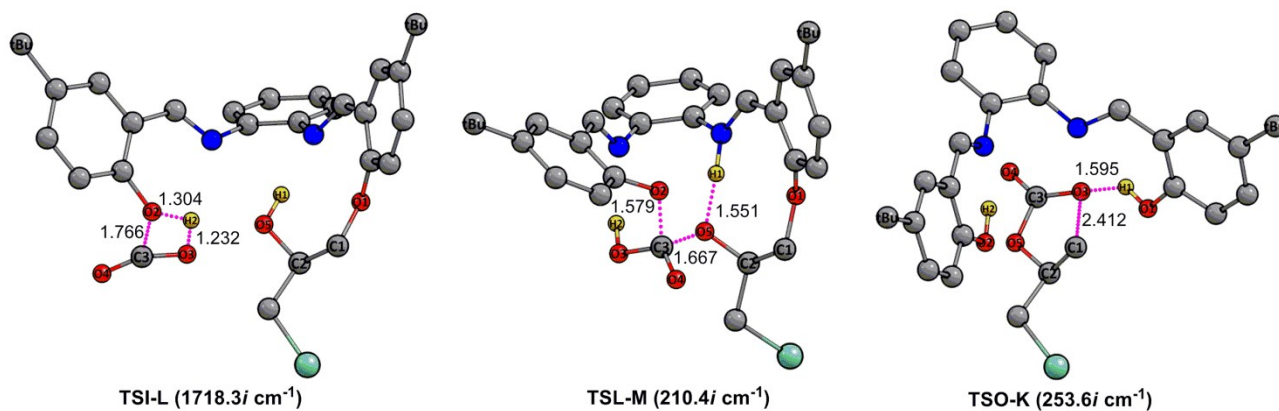

**Fig. S4** Optimized structures involved in the epichlorohydrin ring-opening via the *cis*-configuration pathway.

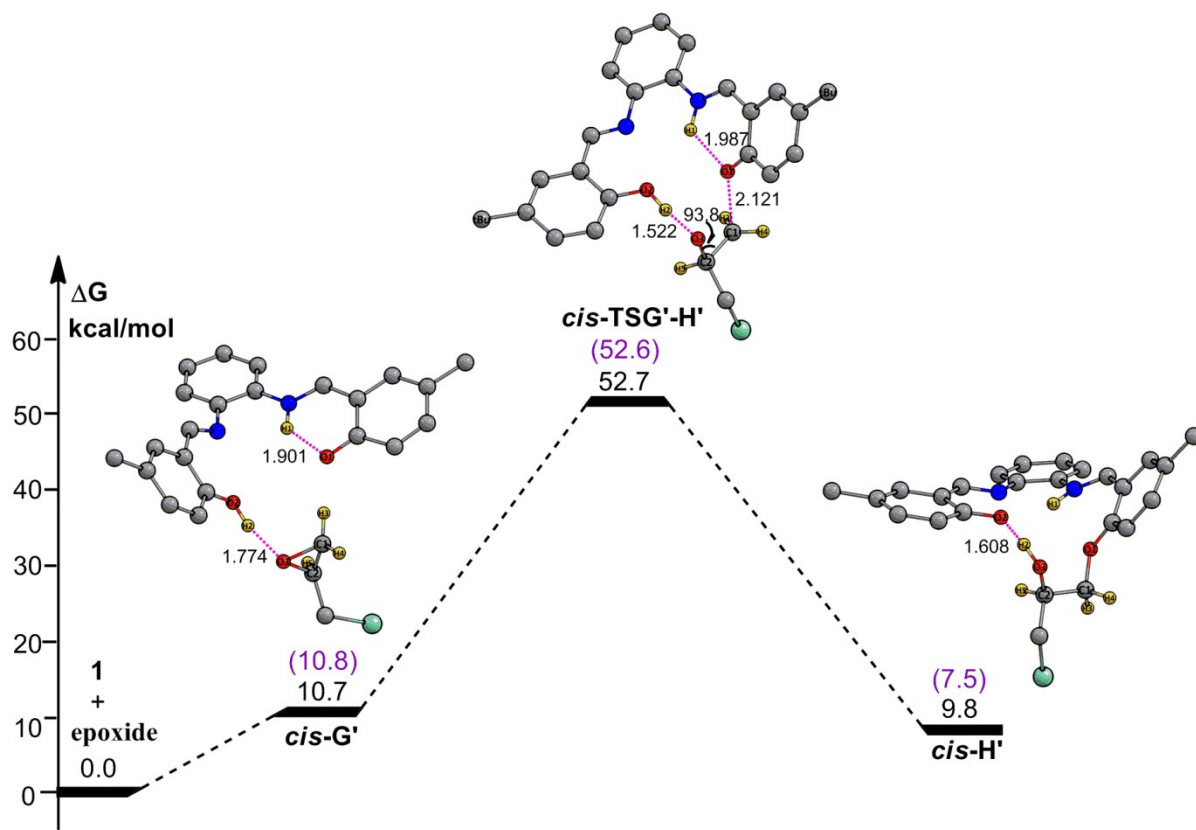

S

Cartesian coordinates of structures at B3LYP/6-311g(d,p) level

1

C, -0.4623040408,2.7913475463,1.3522541172  
C, 0.6711231046,2.3314166483,2.0174954961  
C, 1.4590537933,3.2221511727,2.7396466729  
C, 1.1334360646,4.5825945692,2.8112393663  
C, -0.0441417718,5.0417758988,2.1718640529  
C, -0.8131513751,4.1353692804,1.4310215717  
H, -1.0714859461,2.1086417114,0.7712899723  
H, 0.9418826106,1.2826793766,1.9777807188  
H, 2.3208809961,2.8592407103,3.2875796448  
H, -1.6740580758,4.5015992784,0.8838525643  
N, 1.8868162673,5.4983264858,3.5611610394  
N, -0.3504473485,6.409626008,2.2394997443  
C, 3.1743500022,5.4348400411,3.592533536  
H, 3.7201504679,4.7071348016,2.9795734855  
C, -1.5703985425,6.8161671109,2.3238900893  
H, -2.3999869387,6.1042734719,2.4150026674  
C, 3.9741002881,6.3181584151,4.4126349304  
C, 5.3787349449,6.1919402633,4.4061214638  
C, 3.3703525187,7.3130149736,5.2214320349  
C, 6.2066089886,7.0003685733,5.1706395392  
H, 5.8009232415,5.4228874886,3.7703541519  
C, 4.1972415116,8.1353318733,5.9971945244  
C, 5.570874478,7.9762438329,5.9680392704  
H, 3.7316446962,8.8950905496,6.6132190043  
H, 6.1714612947,8.6350127338,6.5852618792  
C, -1.9219700497,8.2205509218,2.3213079463  
C, -3.2732105543,8.5979028845,2.4039015498  
C, -0.9254108669,9.2291523094,2.2388977137  
C, -3.6892801107,9.9257154708,2.3994559266  
H, -4.0066859992,7.8004365749,2.470585184  
C, -1.3311903671,10.5657642392,2.2363767681  
C, -2.6765785596,10.8980091759,2.313349846  
H, -0.5685535632,11.3326726833,2.1749871013  
H, -2.936912035,11.9485046236,2.3064724551  
O, 2.0461774221,7.4956134731,5.2700785542  
H, 1.6328157451,6.8373445592,4.6539529585  
O, 0.3803958791,8.9437770814,2.1653064264  
H, 0.471539638,7.9574002098,2.1894808213  
C, -5.1868295562,10.2730406633,2.4882660769  
C, -5.7708236663,9.7161717978,3.8072499885  
H, -6.8359908481,9.9557777174,3.8846175903

H, -5.6685146618,8.6300190297,3.8679560728  
 H, -5.2605008544,10.1476593646,4.6724721441  
 C, -5.4332672689,11.7927221858,2.4593718583  
 H, -6.5066927628,11.9908116723,2.5211251426  
 H, -4.9561546857,12.2991564959,3.3028178229  
 H, -5.066865973,12.2467110747,1.5345491056  
 C, -5.9374151658,9.6433056664,1.2919632694  
 H, -5.5472367816,10.0222598635,0.3434992017  
 H, -5.8416387041,8.5549002832,1.2809106562  
 H, -7.0043263737,9.8822946295,1.3416796968  
 C, 7.7392153983,6.8732400401,5.1830535512  
 C, 8.2159438495,6.5242045659,6.6122124268  
 H, 7.788204257,5.574517444,6.94495669  
 H, 9.30644854,6.4349953634,6.6398745758  
 H, 7.9270358488,7.2910721475,7.335064735  
 C, 8.2384591992,5.7725309186,4.2293870353  
 H, 7.8533922091,4.7873210703,4.5070474697  
 H, 7.9539981779,5.9729523697,3.1925843635  
 H, 9.3297834135,5.720999005,4.26745977  
 C, 8.3758828882,8.2125436295,4.7452126162  
 H, 8.0978865888,9.032188701,5.411822442  
 H, 9.4675791567,8.1353019724,4.7517378503  
 H, 8.0592081473,8.4824375961,3.7342181187

|                                              |                             |
|----------------------------------------------|-----------------------------|
| Zero-point correction=                       | 0.537518 (Hartree/Particle) |
| Thermal correction to Energy=                | 0.567857                    |
| Thermal correction to Enthalpy=              | 0.568801                    |
| Thermal correction to Gibbs Free Energy=     | 0.474981                    |
| Sum of electronic and zero-point Energies=   | -1346.032802                |
| Sum of electronic and thermal Energies=      | -1346.002463                |
| Sum of electronic and thermal Enthalpies=    | -1346.001518                |
| Sum of electronic and thermal Free Energies= | -1346.095339                |

#### 1a

C, 0.6648632287,5.0685318554,-0.3072643771  
 C, -0.5992444723,5.0701062527,0.2709497584  
 C, -1.2360757195,3.8605154598,0.5459272247  
 C, -0.625337289,2.6357065665,0.2541535062  
 C, 0.6742721475,2.6341926791,-0.3127335305  
 C, 1.2935654036,3.8571857513,-0.5932045132  
 H, 1.1654200007,6.0025084726,-0.5365853457  
 H, -1.0932903922,6.0052906031,0.5093278016  
 H, -2.206339323,3.8531637889,1.0299560078  
 H, 2.26411532,3.8475956747,-1.0766325578  
 N, -1.2146419231,1.4130713215,0.6027984872  
 N, 1.2565999444,1.410580757,-0.6707911583

C, -2.4136466669,1.1718448934,0.2456957944  
H, -2.9623101941,1.8779761085,-0.3966380578  
C, 2.450787299,1.1568169807,-0.3077731729  
H, 3.0008055131,1.8526540766,0.3445671406  
C, -3.1878311021,-0.0209069123,0.6023748816  
C, -4.4720857657,-0.1402236276,0.040257324  
C, -2.7428166863,-1.0440151072,1.4654093221  
C, -5.3277432133,-1.2115808185,0.2829791118  
H, -4.7876966457,0.6602785067,-0.617293251  
C, -3.5881179098,-2.1277142146,1.7201247048  
C, -4.8474025135,-2.2091388926,1.1440433164  
H, -3.2476543639,-2.9168677153,2.385502571  
H, -5.4633448053,-3.0702308404,1.3767889212  
C, 3.2166909909,-0.0416583775,-0.6658772071  
C, 4.4852524832,-0.1853936773,-0.0870082177  
C, 2.7726826635,-1.054443276,-1.5474264587  
C, 5.3336449471,-1.2705756902,-0.3208697807  
H, 4.8062288809,0.6046172972,0.5838652345  
C, 3.6054909783,-2.144868248,-1.7936826248  
C, 4.8572887912,-2.2527943886,-1.1940325598  
H, 3.2670309615,-2.9242712144,-2.471452856  
H, 5.4579827953,-3.1228052037,-1.4241766092  
O, -1.5171554545,-0.9571625221,2.034927725  
O, 1.5584776609,-0.9415335526,-2.13713815  
C, 6.7078633769,-1.3450589746,0.3684598417  
C, 6.5167039577,-1.3648706275,1.9027364682  
H, 7.486843819,-1.4114215242,2.407340633  
H, 5.9993812328,-0.4707688851,2.2582938887  
H, 5.9299861611,-2.2343557909,2.2113995295  
C, 7.4901875475,-2.6087233667,-0.033031625  
H, 8.4574246013,-2.6186663504,0.4763624104  
H, 6.96006959,-3.522448304,0.2496072062  
H, 7.6839898181,-2.6424751751,-1.1087607858  
C, 7.5535785537,-0.1117213216,-0.0248082325  
H, 7.709534474,-0.0748140114,-1.1063734036  
H, 7.0728782794,0.8224126309,0.2750725677  
H, 8.5339757291,-0.1515326879,0.4600916104  
C, -6.732967926,-1.330444817,-0.3323397045  
C, -7.7884149777,-1.3539746765,0.7976969982  
H, -7.7446560077,-0.4362761445,1.3904249168  
H, -8.7955780555,-1.4410442771,0.3781720659  
H, -7.6368492425,-2.1969056518,1.476418819  
C, -7.061200522,-0.1540732254,-1.2695322742  
H, -7.0453327875,0.8036328986,-0.7421861463

|                                              |                             |
|----------------------------------------------|-----------------------------|
| H, -6.3633722066,-0.0949442842,-2.109367213  |                             |
| H, -8.0646094666,-0.2842212239,-1.6836568416 |                             |
| C, -6.8323006824,-2.638297239,-1.1511873917  |                             |
| H, -6.6548800734,-3.5205587177,-0.5315422877 |                             |
| H, -7.8292938388,-2.7371187732,-1.5915807285 |                             |
| H, -6.0990241084,-2.646870077,-1.9620918425  |                             |
| H, 1.4169306683,-1.7108524323,-2.6997918902  |                             |
| H, -1.3780277732,-1.7341469973,2.5875223465  |                             |
| Zero-point correction=                       | 0.535613 (Hartree/Particle) |
| Thermal correction to Energy=                | 0.566980                    |
| Thermal correction to Enthalpy=              | 0.567924                    |
| Thermal correction to Gibbs Free Energy=     | 0.471407                    |
| Sum of electronic and zero-point Energies=   | -1345.989389                |
| Sum of electronic and thermal Energies=      | -1345.958021                |
| Sum of electronic and thermal Enthalpies=    | -1345.957077                |
| Sum of electronic and thermal Free Energies= | -1346.053595                |

### 1b

C, 0.7719643727,5.0470429628,-0.2305550306  
 C, -0.5640765487,5.0700029977,0.1627775729  
 C, -1.2658754142,3.8764698082,0.2983240638  
 C, -0.6532868467,2.6429758006,0.042498663  
 C, 0.7249190486,2.6156036697,-0.2949067134  
 C, 1.4085231203,3.8297741517,-0.4505442392  
 H, 1.3199662373,5.973457795,-0.3601361468  
 H, -1.05985574,6.0127219241,0.3639318468  
 H, -2.2965784974,3.8970004513,0.6328938768  
 H, 2.4416992444,3.8098470754,-0.7776177932  
 N, -1.3177910428,1.4126130296,0.1633962732  
 N, 1.3157591226,1.3710404119,-0.5322002159  
 C, -2.57830785,1.2963805214,-0.0661831157  
 H, -3.1852239214,2.1484319873,-0.3972134182  
 C, 2.5059184231,1.1389122089,-0.1340153268  
 H, 3.0740508643,1.8938094273,0.4317885878  
 C, -3.2722668885,0.0311195349,0.0723564308  
 C, -4.6686036668,-0.0181795337,-0.1120795154  
 C, -2.5709784365,-1.1634225071,0.3710561305  
 C, -5.4019538847,-1.1911469202,0.0026719994  
 H, -5.1662076174,0.9153728182,-0.3467497631  
 C, -3.301256655,-2.3536014382,0.4842461881  
 C, -4.673706709,-2.3595329669,0.3075006729  
 H, -2.7620329177,-3.2646517523,0.7154449163  
 H, -5.1957462576,-3.3046040783,0.4084342855  
 C, 3.2322412854,-0.1151403218,-0.3386857566  
 C, 4.5757105899,-0.1579005244,0.0612953149



C, 2.6564564764,-1.2945764145,-0.8676914596  
 C, 5.3825062245,-1.2931312075,-0.040820587  
 H, 4.9909375614,0.7549996737,0.4758635597  
 C, 3.443688398,-2.4405472175,-0.9666483333  
 C, 4.7763581607,-2.4396174382,-0.5653185696  
 H, 3.0042275486,-3.3487834902,-1.3695254574  
 H, 5.3377936654,-3.3588202517,-0.668167059  
 O, -1.2437170717,-1.205603198,0.5383311962  
 O, 1.3600962028,-1.2817347091,-1.2523085201  
 C, 6.8510368192,-1.2493820159,0.4182423849  
 C, 6.9144942609,-0.885313526,1.9197083922  
 H, 7.9541339036,-0.8496169288,2.2597491091  
 H, 6.4662820904,0.0905474478,2.121004694  
 H, 6.3841889044,-1.6269003013,2.523153743  
 C, 7.5582310517,-2.6030273782,0.2241813826  
 H, 8.5952385503,-2.5275685521,0.5615368331  
 H, 7.0804966415,-3.397900722,0.803634558  
 H, 7.5750924508,-2.9063324792,-0.8263263584  
 C, 7.6177987162,-0.184256368,-0.399326698  
 H, 7.595671774,-0.4212490286,-1.4664661219  
 H, 7.1885995745,0.8121965989,-0.2703660152  
 H, 8.6641334473,-0.139533986,-0.0815327579  
 C, -6.9276129245,-1.2582899645,-0.1817229642  
 C, -7.583249135,-1.7665120967,1.1233093619  
 H, -7.3620729057,-1.0944037064,1.9568212189  
 H, -8.6703821843,-1.8219430564,1.008808372  
 H, -7.2265122084,-2.7628535271,1.395249339  
 C, -7.5333631479,0.1166453612,-0.5174987458  
 H, -7.3569232277,0.8439714715,0.2798110595  
 H, -7.1292192893,0.5231993632,-1.4488627826  
 H, -8.6153290311,0.021137106,-0.6423507906  
 C, -7.2691147756,-2.2283723874,-1.3363868901  
 H, -6.9051433979,-3.2391675501,-1.1379194302  
 H, -8.3528759109,-2.2871485421,-1.4779989907  
 H, -6.8207219216,-1.890523314,-2.2745713224  
 H, 1.0648455728,-2.1840065233,-1.4172580019  
 H, -0.8875714875,-0.2867422645,0.4144456737

|                                            |                             |
|--------------------------------------------|-----------------------------|
| Zero-point correction=                     | 0.536204 (Hartree/Particle) |
| Thermal correction to Energy=              | 0.567156                    |
| Thermal correction to Enthalpy=            | 0.568101                    |
| Thermal correction to Gibbs Free Energy=   | 0.471999                    |
| Sum of electronic and zero-point Energies= | -1346.013375                |
| Sum of electronic and thermal Energies=    | -1345.982423                |
| Sum of electronic and thermal Enthalpies=  | -1345.981479                |

Sum of electronic and thermal Free Energies= -1346.077580

1-

C, 0.8390507227,4.8899948154,-0.3418998099  
C, -0.5019685478,4.9736239749,0.0345370958  
C, -1.2328094699,3.7995014712,0.1960722737  
C, -0.6493181718,2.5430276496,-0.0061465191  
C, 0.7311539824,2.4406461468,-0.3576604842  
C, 1.4400137687,3.6521329027,-0.5320420507  
H, 1.4202927681,5.7956875621,-0.4879116589  
H, -0.9708533601,5.9362987311,0.2074162474  
H, -2.2641630176,3.8498410101,0.5296444206  
H, 2.4717343206,3.5964050244,-0.8593152448  
N, -1.3595065297,1.3514296029,0.1996098639  
N, 1.2733547628,1.2037514968,-0.6044664222  
C, -2.6069202284,1.2419320756,-0.0844391776  
H, -3.1620967449,2.0582741668,-0.565783156  
C, 2.5072122948,0.9637512974,-0.2684564338  
H, 3.0296321323,1.7004331278,0.3691688374  
C, -3.3538604618,0.0281052304,0.2008383776  
C, -4.7320901266,-0.027217353,-0.0743258833  
C, -2.7119525933,-1.1089362048,0.7544493619  
C, -5.5101564696,-1.1499570913,0.1848286523  
H, -5.1796431684,0.8608493748,-0.5055785206  
C, -3.4889939134,-2.2466672677,1.019147999  
C, -4.8452717901,-2.2600545145,0.7427070084  
H, -2.9916553431,-3.1137183368,1.4377672192  
H, -5.4016944856,-3.165291206,0.9626496379  
C, 3.3028334392,-0.1756697929,-0.589002055  
C, 4.5900939996,-0.2294677188,0.0013969221  
C, 2.8629259356,-1.2553513809,-1.4931102617  
C, 5.5017686121,-1.2507811328,-0.1905897559  
H, 4.8557729909,0.602936988,0.6518338826  
C, 3.8523688348,-2.3151489356,-1.6550000988  
C, 5.0799176467,-2.3082920874,-1.0497078729  
H, 3.5576317904,-3.1322903438,-2.3069353905  
H, 5.7480482865,-3.142841079,-1.2394088397  
O, -1.409311545,-1.1423053506,1.0307424001  
H, -1.007101887,-0.2796557295,0.7341861181  
O, 1.771444824,-1.288206913,-2.0828350489  
C, 6.87599239,-1.2230153215,0.5040366658  
C, 6.6944884743,-1.220481359,2.0406161461  
H, 7.6646684785,-1.1929769525,2.5530484943  
H, 6.1141637395,-0.3553128692,2.3695205971  
H, 6.1597429484,-2.1177977129,2.3643955345

C, 7.741466499,-2.4437408079,0.1372420818  
 H, 8.7088138861,-2.381112536,0.6472487957  
 H, 7.2651581168,-3.3806564188,0.4392705059  
 H, 7.9326938636,-2.4934225445,-0.9384534308  
 C, 7.6579204331,0.0468630387,0.0914365032  
 H, 7.8157058397,0.0651408982,-0.9906638505  
 H, 7.1123128091,0.9543529446,0.3603815569  
 H, 8.6379253779,0.0831881525,0.5839479359  
 C, -7.0179742063,-1.2226842361,-0.1126765311  
 C, -7.794121325,-1.5114883275,1.1935734604  
 H, -7.6257283507,-0.7180302802,1.9269983891  
 H, -8.8701198378,-1.5747171548,0.9970943447  
 H, -7.4809700544,-2.4547255744,1.6472546733  
 C, -7.5596825786,0.0900494831,-0.707582821  
 H, -7.4209524314,0.9317642728,-0.0233655629  
 H, -7.0717302897,0.3362975129,-1.6544058978  
 H, -8.6321282617,-0.0068140962,-0.9020237974  
 C, -7.2927221443,-2.3565030314,-1.1280104697  
 H, -6.9614563504,-3.3259632828,-0.7484760333  
 H, -8.3640820099,-2.4292202145,-1.3455500419  
 H, -6.7641662742,-2.1703957931,-2.066748882

|                                              |                             |
|----------------------------------------------|-----------------------------|
| Zero-point correction=                       | 0.521864 (Hartree/Particle) |
| Thermal correction to Energy=                | 0.552457                    |
| Thermal correction to Enthalpy=              | 0.553401                    |
| Thermal correction to Gibbs Free Energy=     | 0.457944                    |
| Sum of electronic and zero-point Energies=   | -1345.475858                |
| Sum of electronic and thermal Energies=      | -1345.445265                |
| Sum of electronic and thermal Enthalpies=    | -1345.444321                |
| Sum of electronic and thermal Free Energies= | -1345.539779                |

#### A

C, 0.7142430404,5.2135581211,-0.0990702591  
 C, -0.6273452065,5.2027217121,0.274126578  
 C, -1.2984341582,3.9920581757,0.4112555164  
 C, -0.6491794606,2.7725316217,0.1775913898  
 C, 0.7279427609,2.7836389618,-0.1549433977  
 C, 1.3825483961,4.0119661382,-0.3099086974  
 H, 1.2400523367,6.1525964364,-0.2270339898  
 H, -1.1511575242,6.1329520157,0.461272743  
 H, -2.3318167519,3.983445122,0.7375831614  
 H, 2.4171685963,4.0187401549,-0.6327779913  
 N, -1.2855659369,1.5326181952,0.3391638402  
 N, 1.368509292,1.55706676,-0.3897959196  
 C, -2.5252788109,1.3702647994,0.0223437938  
 H, -3.1018045439,2.1776112836,-0.4450282761

C, 2.5887423313,1.3599929355,-0.0258873869  
H, 3.1441614297,2.1228757272,0.5329708125  
C, -3.2254076334,0.1244650242,0.2442466145  
C, -4.5888650235,0.0216604807,-0.1002840503  
C, -2.5624877038,-1.0014203647,0.7912924093  
C, -5.3226862497,-1.1409358547,0.08397825  
H, -5.0569416912,0.9023523455,-0.5235420235  
C, -3.2936051797,-2.1798317166,0.9841326414  
C, -4.6321877178,-2.2389150152,0.639768848  
H, -2.783297756,-3.0369685618,1.4069878144  
H, -5.1591821091,-3.1716673756,0.806929887  
C, 3.2887591999,0.1233883339,-0.3057552488  
C, 4.6208453226,-0.0335389505,0.1129678338  
C, 2.6485848802,-0.9456136171,-0.9851341694  
C, 5.3510409807,-1.1967788598,-0.1123202998  
H, 5.0798939466,0.802136681,0.6321188065  
C, 3.3666621431,-2.1204592863,-1.2120616556  
C, 4.6830586041,-2.2351229049,-0.7854374623  
H, 2.8688983733,-2.9383023948,-1.7184232633  
H, 5.196617598,-3.1665871271,-0.9849464142  
O, -1.2657431919,-0.9827275978,1.1232328104  
H, -0.9211112079,-0.0747780496,0.9202315049  
O, 1.3784941046,-0.8595256417,-1.4105515616  
H, 1.0333370152,0.0345408263,-1.148550659  
C, 6.8106828078,-1.3045997688,0.3663149051  
C, 6.8700225379,-1.1123317705,1.8994596365  
H, 7.9031850342,-1.1834775422,2.2534421624  
H, 6.4825507237,-0.1364414213,2.2017129028  
H, 6.2810234682,-1.8781470511,2.4111794704  
C, 7.4321936915,-2.6731411594,0.032423012  
H, 8.4645610964,-2.7034716536,0.3905360568  
H, 6.892366573,-3.493563395,0.5130787389  
H, 7.4520391043,-2.8597314934,-1.04481774  
C, 7.6617060058,-0.2106842392,-0.3193190539  
H, 7.6456649838,-0.3284005798,-1.4062189874  
H, 7.2950016533,0.7921121789,-0.0873233005  
H, 8.7022706163,-0.2703712252,0.0146862227  
C, -6.8095017793,-1.2732972667,-0.2856728931  
C, -7.6286092268,-1.6216845873,0.9786873458  
H, -7.5311432146,-0.8373018361,1.7342067329  
H, -8.6891623041,-1.725278438,0.7291591958  
H, -7.3004015914,-2.5612776544,1.4296573754  
C, -7.3782069065,0.0276455895,-0.8807502465  
H, -7.3165423329,0.8595269527,-0.173442997

|                                              |                             |
|----------------------------------------------|-----------------------------|
| H, -6.858394533,0.3168454495,-1.7983709711   |                             |
| H, -8.4330353223,-0.1135275571,-1.1308204452 |                             |
| C, -6.9829855641,-2.3970064053,-1.3338494778 |                             |
| H, -6.6408784282,-3.3627002174,-0.9542521102 |                             |
| H, -8.0369908607,-2.5028957666,-1.6091287561 |                             |
| H, -6.4143176867,-2.1743032561,-2.2406746877 |                             |
| C, -0.6050193531,-2.7093035598,-2.2033052352 |                             |
| O, -1.3256421947,-1.816364374,-2.3729503983  |                             |
| O, 0.0860602973,-3.6304574059,-2.0547264573  |                             |
| Zero-point correction=                       | 0.549908 (Hartree/Particle) |
| Thermal correction to Energy=                | 0.584596                    |
| Thermal correction to Enthalpy=              | 0.585541                    |
| Thermal correction to Gibbs Free Energy=     | 0.478877                    |
| Sum of electronic and zero-point Energies=   | -1534.666574                |
| Sum of electronic and thermal Energies=      | -1534.631886                |
| Sum of electronic and thermal Enthalpies=    | -1534.630941                |
| Sum of electronic and thermal Free Energies= | -1534.737605                |

## B

C, -0.6172511721,5.3826363282,-0.1883893465  
 C, 0.7467301533,5.3453594778,-0.4692296967  
 C, 1.3937418715,4.1207780326,-0.5875674607  
 C, 0.6986650989,2.9135307622,-0.4336889539  
 C, -0.6925541313,2.9609950909,-0.1792621136  
 C, -1.3288397539,4.1980228615,-0.0384082454  
 H, -1.1286797961,6.3316567719,-0.0798704433  
 H, 1.303768202,6.2651208588,-0.6028969212  
 H, 2.4454190333,4.087663044,-0.8460093951  
 H, -2.3805193178,4.23666698,0.2168716713  
 N, 1.3054017054,1.6605715722,-0.6008835498  
 N, -1.3824742616,1.7468765203,-0.0433358813  
 C, 2.5085547068,1.4523538038,-0.1787623638  
 H, 3.0372595237,2.2180669663,0.4009952831  
 C, -2.6942697547,1.5552767101,-0.1882438462  
 H, -3.2900569055,2.4123441999,-0.4882092257  
 C, 3.2353562055,0.230660795,-0.429796051  
 C, 4.5396294627,0.0885736826,0.0893752645  
 C, 2.6751608213,-0.824028249,-1.1905514208  
 C, 5.3102004889,-1.044870735,-0.1182062491  
 H, 4.928770863,0.9153024414,0.6714979998  
 C, 3.4473138437,-1.9704467974,-1.4147831283  
 C, 4.7232532029,-2.0704821231,-0.8903539245  
 H, 3.0153449995,-2.7727470844,-2.0007296103  
 H, 5.2824262117,-2.9786549905,-1.0863194989  
 C, -3.3166779701,0.3250077322,0.0040378527

C, -4.7311496565,0.2121810766,-0.1885160343  
C, -2.5230082623,-0.84239245,0.390611757  
C, -5.4021920119,-0.9672956134,-0.0183024823  
H, -5.2614984509,1.1126173407,-0.477447487  
C, -3.2663677537,-2.0664088912,0.5580203399  
C, -4.6154125284,-2.1101636248,0.3627222467  
H, -2.7049823297,-2.9488951707,0.8400924858  
H, -5.1180913573,-3.0617690883,0.5021834674  
O, 1.4416090282,-0.7706359172,-1.7054506147  
H, 1.0341490392,0.083812511,-1.4299492823  
O, -1.276853205,-0.774957067,0.5616728435  
H, -0.8759759563,0.8720005556,0.1927388668  
C, -6.9171902632,-1.1272138645,-0.2106303596  
C, -7.1908177342,-2.1595778979,-1.329603873  
H, -8.268092929,-2.292839828,-1.4705382875  
H, -6.760887841,-1.827171625,-2.2782923188  
H, -6.7643507878,-3.1376912599,-1.0950435297  
C, -7.5578157966,-1.6215763547,1.1079110368  
H, -8.6376108728,-1.7488022459,0.9823882334  
H, -7.1464909434,-2.5823308462,1.4261661674  
H, -7.3906339514,-0.9032435219,1.915117297  
C, -7.595239956,0.1969152503,-0.6046063743  
H, -7.4631747947,0.963990711,0.163610564  
H, -7.2064929406,0.5855984177,-1.5498880395  
H, -8.6695038212,0.0377057467,-0.7305781758  
C, 6.7299706063,-1.2197058507,0.4461761798  
C, 7.7272088616,-1.4288203348,-0.7169216949  
H, 7.7292375086,-0.5657226564,-1.3882034747  
H, 8.7423299484,-1.5626978514,-0.3304424522  
H, 7.4788170456,-2.3121216501,-1.3098369598  
C, 7.1870370936,0.0068178229,1.2563236134  
H, 7.2141176037,0.9120286471,0.6430991001  
H, 6.535699609,0.1921179614,2.1148781385  
H, 8.1970873817,-0.1611221046,1.6392747267  
C, 6.7648180983,-2.4531013668,1.3782961396  
H, 6.4922958203,-3.369111302,0.8487679256  
H, 7.7697800932,-2.5929877024,1.7883987687  
H, 6.0691550449,-2.3305405992,2.2126860108  
C, 0.5723195824,-2.5283761371,1.6158378646  
O, 1.2564155382,-1.6213285767,1.850973489  
O, -0.0622780906,-3.4805522947,1.4163254326

|                                 |                             |
|---------------------------------|-----------------------------|
| Zero-point correction=          | 0.549797 (Hartree/Particle) |
| Thermal correction to Energy=   | 0.584629                    |
| Thermal correction to Enthalpy= | 0.585573                    |

|                                              |              |
|----------------------------------------------|--------------|
| Thermal correction to Gibbs Free Energy=     | 0.478646     |
| Sum of electronic and zero-point Energies=   | -1534.662025 |
| Sum of electronic and thermal Energies=      | -1534.627193 |
| Sum of electronic and thermal Enthalpies=    | -1534.626249 |
| Sum of electronic and thermal Free Energies= | -1534.733176 |

**C**

C, 0.3694034592,4.8683084277,2.1663290629  
 C, -0.9505686075,4.6224415292,2.5347996928  
 C, -1.6180133661,3.5161218467,2.0194605585  
 C, -0.9869011469,2.6395194498,1.1275130194  
 C, 0.3751077379,2.8563020473,0.7990312073  
 C, 1.0230039157,3.9892121241,1.3093119662  
 H, 0.8904318469,5.7403837351,2.5440920147  
 H, -1.4611679583,5.2877664568,3.2212564817  
 H, -2.6336639176,3.3070756859,2.33442611  
 H, 2.0391563173,4.1973526986,0.9956569461  
 N, -1.632282669,1.5048837213,0.6038474327  
 N, 0.9906630185,1.9732155663,-0.1014045687  
 C, -2.8940346272,1.5294975888,0.3227769015  
 H, -3.4712315145,2.4580347021,0.3991873996  
 C, 2.2190679918,1.6531440816,0.0579208988  
 H, 2.7868964563,2.0159049732,0.9261725355  
 C, -3.6149553819,0.358194648,-0.1193392227  
 C, -4.9812739724,0.4698684592,-0.4548028148  
 C, -2.9797950717,-0.9044282676,-0.2163627106  
 C, -5.7378846575,-0.610833583,-0.880675504  
 H, -5.4303269047,1.4520443714,-0.3696058839  
 C, -3.7351941333,-2.0039658209,-0.6397548938  
 C, -5.0717573522,-1.8529030238,-0.9614844918  
 H, -3.2437699187,-2.9665177454,-0.7127150671  
 H, -5.6170708175,-2.73094996,-1.2888951537  
 C, 3.0002040893,0.8138395135,-0.8562051721  
 C, 4.3850190062,0.7381138527,-0.6553853872  
 C, 2.4508959725,0.0812588687,-1.9248463946  
 C, 5.2357036923,-0.0013368129,-1.4834017012  
 H, 4.7993987259,1.2957691694,0.1778014303  
 C, 3.2646149411,-0.6634113176,-2.757612172  
 C, 4.6423198827,-0.6983045777,-2.541160152  
 H, 2.8149209815,-1.2150272512,-3.573008492  
 H, 5.2488890366,-1.2873769867,-3.2156338016  
 O, -1.6845323044,-1.0850880142,0.0759461722  
 H, -1.3174660567,-0.2139943343,0.3695843027  
 O, 1.0782787874,0.0532282455,-2.0702225438  
 H, -0.7400203967,1.085957142,-1.5969465734

C, 6.7504472986,-0.0192817727,-1.2110178062  
 C, 7.0146078713,-0.5887971945,0.2022056722  
 H, 8.0889172389,-0.6052512634,0.4087849099  
 H, 6.5369860458,0.0113903105,0.9803106587  
 H, 6.6361028914,-1.6108320157,0.2887264373  
 C, 7.5136261563,-0.8869671519,-2.2280699763  
 H, 8.5817059853,-0.8678141668,-1.9967194738  
 H, 7.1893250467,-1.9307231465,-2.1976536158  
 H, 7.3924562909,-0.5186814966,-3.2503899002  
 C, 7.3038915725,1.42228406,-1.2956432584  
 H, 7.129243115,1.8501998021,-2.286321748  
 H, 6.8363420238,2.0812479604,-0.5601535474  
 H, 8.3817595358,1.4259635455,-1.1077160554  
 C, -7.224617618,-0.5074989958,-1.2598548862  
 C, -8.0562768611,-1.4448483528,-0.3536172033  
 H, -7.9494129401,-1.1668635902,0.698485937  
 H, -9.117135236,-1.3852052798,-0.6155463777  
 H, -7.7485977591,-2.4882161481,-0.4556421731  
 C, -7.7675427966,0.9234774831,-1.0958485735  
 H, -7.6909745733,1.2713974609,-0.0618460873  
 H, -7.2408892309,1.6341839063,-1.73864216  
 H, -8.8243203854,0.9490707405,-1.373982698  
 C, -7.4095001713,-0.9266999314,-2.7368502444  
 H, -7.0784161188,-1.9529446211,-2.9127408433  
 H, -8.4643889185,-0.8643619472,-3.0214509452  
 H, -6.8379954804,-0.2733284451,-3.4014002191  
 C, 0.4878770556,0.8961123378,-2.9921958844  
 O, 0.978852057,1.2302726404,-4.0254830541  
 O, -0.7222056196,1.2310560224,-2.5595562262

|                                              |                             |
|----------------------------------------------|-----------------------------|
| Zero-point correction=                       | 0.551580 (Hartree/Particle) |
| Thermal correction to Energy=                | 0.585072                    |
| Thermal correction to Enthalpy=              | 0.586016                    |
| Thermal correction to Gibbs Free Energy=     | 0.483877                    |
| Sum of electronic and zero-point Energies=   | -1534.626145                |
| Sum of electronic and thermal Energies=      | -1534.592653                |
| Sum of electronic and thermal Enthalpies=    | -1534.591709                |
| Sum of electronic and thermal Free Energies= | -1534.693848                |

#### D

C, -0.5754917666,4.7532044794,0.7854713191  
 C, 0.7534850951,4.8850555582,0.3912872321  
 C, 1.4600867079,3.7652458869,-0.0307975213  
 C, 0.8614418738,2.4990634119,-0.0717067734  
 C, -0.5117541012,2.3760754657,0.2542047368  
 C, -1.1965144981,3.5118211383,0.713625124



H, -1.1284089164,5.6124022136,1.1473182434  
H, 1.241290552,5.8524824481,0.4184095135  
H, 2.4881881784,3.8704579514,-0.3562254971  
H, -2.219944355,3.4048424354,1.0524999463  
N, 1.5682981932,1.3553895128,-0.4813542817  
N, -1.1206466671,1.1101301868,0.1878631597  
C, 2.8114685149,1.2111098248,-0.1786100758  
H, 3.3373329027,1.9395285229,0.4434194833  
C, -2.3474501553,1.0375220727,-0.1637406422  
H, -2.8974267019,1.9350246573,-0.4788404711  
C, 3.5721401839,0.0540944525,-0.6155227762  
C, 4.9599803447,-0.0011917706,-0.3891475709  
C, 2.9355373061,-1.0393704109,-1.2395848295  
C, 5.736636378,-1.0896740107,-0.7702406424  
H, 5.4138616048,0.8499585082,0.1034574191  
C, 3.696067005,-2.1442272255,-1.6205561016  
C, 5.0636149579,-2.159297523,-1.3920555984  
H, 3.1972179612,-2.9798587986,-2.0967136734  
H, 5.6216457663,-3.0338340855,-1.7063405128  
C, -3.1630873528,-0.1800878458,-0.1788015326  
C, -4.543105452,-0.0211075464,-0.3714965522  
C, -2.6771754266,-1.4890019171,-0.0202888983  
C, -5.4466927072,-1.0880026102,-0.3879606004  
H, -4.9090173931,0.9912924368,-0.5049394882  
C, -3.5443014497,-2.565571249,-0.0433448321  
C, -4.913268866,-2.3690805268,-0.2184469308  
H, -3.1369860676,-3.5625728051,0.0717437541  
H, -5.5578168267,-3.237611446,-0.2235181045  
O, 1.5922606212,-1.0598747891,-1.4352526736  
H, 1.2564212599,-0.1403419921,-1.2091261578  
O, -1.3176657066,-1.7517020375,0.0469635789  
H, 0.847987379,-1.7508185091,0.1165096822  
C, -6.9493743824,-0.8234558903,-0.5896731959  
C, -7.1719690726,-0.1260912665,-1.9516709171  
H, -8.2372434229,0.0689829332,-2.1074005558  
H, -6.647454599,0.8303791757,-2.0105133035  
H, -6.8173753694,-0.7531422357,-2.774107471  
C, -7.7743705177,-2.1230250238,-0.5755011903  
H, -8.8315733166,-1.8857984032,-0.7189326217  
H, -7.4779614406,-2.8028509786,-1.3789085018  
H, -7.6820529434,-2.6534240261,0.3760466451  
C, -7.4684034925,0.0883460667,0.5463018882  
H, -7.3254245157,-0.383209359,1.5221413219  
H, -6.9539550206,1.0519704226,0.5627453158

H, -8.5369509101,0.2845664689,0.416119413  
 C, 7.2562412157,-1.1644972426,-0.5415135773  
 C, 7.9755148009,-1.3133886299,-1.9021420562  
 H, 7.7642048019,-0.4586560423,-2.5502853206  
 H, 9.0583846355,-1.3708105727,-1.7554313789  
 H, 7.6638718697,-2.2177924112,-2.4297606204  
 C, 7.8019027417,0.0957816501,0.1536063768  
 H, 7.6298570899,0.9958738624,-0.4431122933  
 H, 7.3517928205,0.2450097169,1.1388669334  
 H, 8.8810702065,-0.0024198435,0.2970778995  
 C, 7.5857899652,-2.3861404907,0.3477625256  
 H, 7.2628605528,-3.3233291777,-0.1116184601  
 H, 8.6648789396,-2.4537379256,0.5164917059  
 H, 7.0945146335,-2.3054756838,1.3212089799  
 C, -0.6761644299,-1.6099660937,1.2507928093  
 O, -1.2069513079,-1.4108139561,2.3014651453  
 O, 0.6291189695,-1.7824530459,1.0724247679  
 C, 1.5029466346,0.6395515163,3.7961171101  
 C, 2.8053729877,0.0003920368,4.0052490682  
 O, 2.6203829613,0.9331274325,2.9332040401  
 H, 0.6963697823,0.072354944,3.3409496205  
 H, 1.2064008911,1.4585160069,4.4458875005  
 H, 3.4445151251,0.3577699899,4.8102991124  
 C, 3.0559600389,-1.413321782,3.5580583365  
 H, 4.06448216,-1.5325106756,3.16504677  
 H, 2.3236006128,-1.7305671479,2.8204178586  
 Cl, 2.9295040186,-2.5534574834,4.9747035152

|                                              |                             |
|----------------------------------------------|-----------------------------|
| Zero-point correction=                       | 0.629620 (Hartree/Particle) |
| Thermal correction to Energy=                | 0.670198                    |
| Thermal correction to Enthalpy=              | 0.671143                    |
| Thermal correction to Gibbs Free Energy=     | 0.550624                    |
| Sum of electronic and zero-point Energies=   | -2187.344521                |
| Sum of electronic and thermal Energies=      | -2187.303942                |
| Sum of electronic and thermal Enthalpies=    | -2187.302998                |
| Sum of electronic and thermal Free Energies= | -2187.423517                |

#### D'

C, -0.6774691562,-3.1614318071,-5.2102925008  
 C, 0.7157318862,-3.1233295742,-5.2199017807  
 C, 1.4043599542,-2.5717988427,-4.1451908676  
 C, 0.7069744023,-2.0764826988,-3.0415878759  
 C, -0.7080167185,-2.135374578,-3.0068617839  
 C, -1.3791097348,-2.6655560468,-4.1171171236  
 H, -1.2174567167,-3.5590020926,-6.0615853213  
 H, 1.2671491755,-3.4934432794,-6.0758824635

H, 2.4842741035,-2.4991141538,-4.1838864087  
H, -2.462445112,-2.6561598327,-4.1282198895  
N, 1.3407141527,-1.4835644563,-1.9386151027  
N, -1.3471666718,-1.599053465,-1.8822332778  
C, 2.6191431605,-1.5505381407,-1.5949707472  
H, 3.2551731777,-2.2112013512,-2.1769138828  
C, -2.4047709171,-2.1652698716,-1.4360189483  
H, -2.7639197901,-3.0928302268,-1.9034872596  
C, 3.1848097992,-0.8254625312,-0.537255153  
C, 4.5736416427,-0.9833874585,-0.2417303324  
C, 2.3742458419,0.102994295,0.2309350987  
C, 5.1971675438,-0.2686551644,0.7483553739  
H, 5.1285894321,-1.6972888644,-0.8397283713  
C, 3.0525211946,0.8542347998,1.2419837568  
C, 4.3873408518,0.6619272913,1.4774258394  
H, 2.4780385511,1.5770379778,1.8114736791  
H, 4.8505207298,1.2522921422,2.2610293566  
C, -3.2461833107,-1.7407985754,-0.3175679746  
C, -4.3633136881,-2.5639646644,-0.0609247689  
C, -3.0423375029,-0.6214865614,0.5146765869  
C, -5.274676831,-2.3253696318,0.9602337782  
H, -4.4968182688,-3.4197640721,-0.7105844895  
C, -3.9375801761,-0.3694132699,1.5540839297  
C, -5.0264937634,-1.2026490078,1.763896412  
H, -3.7882679438,0.4918598602,2.1864633035  
H, -5.6947612082,-0.9629859232,2.5828461058  
O, 1.1291257314,0.222123314,-0.0102655822  
O, -1.9105389732,0.1318696228,0.321903749  
C, -6.4963771557,-3.2191856628,1.230873428  
C, -6.5893909346,-4.3954547261,0.2422931826  
H, -7.4723029951,-4.9976452589,0.4719826304  
H, -6.6860449579,-4.0515612804,-0.7912504653  
H, -5.7177270784,-5.0526618935,0.3069203577  
C, -6.4041122605,-3.7970976864,2.6622657238  
H, -7.269907252,-4.4328934698,2.8706474306  
H, -5.5008519554,-4.401316385,2.7824352893  
H, -6.3812665276,-3.0083019887,3.4176108121  
C, -7.7865514457,-2.3765457864,1.1011855224  
H, -7.8015945934,-1.545332625,1.8097218465  
H, -7.8814064849,-1.9590338218,0.0952292354  
H, -8.6662734703,-2.9970290673,1.2973022202  
C, 6.6856814129,-0.4104728265,1.099634638  
C, 6.8284581241,-0.8571400825,2.5733997369  
H, 6.3477307092,-1.8257789612,2.7348454413

H, 7.8852266776,-0.9517147035,2.8417804927  
 H, 6.3747765277,-0.1408791086,3.2623527324  
 C, 7.3945212412,-1.4503852583,0.2135215515  
 H, 6.9541178858,-2.4453266686,0.3238664346  
 H, 7.3608308287,-1.1739458617,-0.8441161991  
 H, 8.4468202131,-1.5228187871,0.5007329722  
 C, 7.3951904906,0.9502751899,0.9058632623  
 H, 6.9649488217,1.7287475707,1.5403034971  
 H, 8.4565009149,0.8660239382,1.1590348015  
 H, 7.3179524879,1.2847381717,-0.1322603448  
 C, -1.8827004261,1.4933913105,0.6024399854  
 O, -2.8521718577,2.1555326095,0.8466121542  
 O, -0.6528298442,1.937224039,0.552182124  
 H, 0.049554538,1.2219751994,0.3809173527  
 C, 1.1220060603,4.614115768,1.3668747606  
 C, 0.2055877521,4.4233159872,2.4922725007  
 O, 1.4482115727,3.6974051092,2.4214239164  
 H, 0.8674657037,4.1449153361,0.4208556256  
 H, -0.6859026812,3.8265618592,2.3350367543  
 H, 0.1614902651,5.1751099204,3.27667169  
 C, 2.0396633502,5.8022997182,1.3000151778  
 H, 2.9693293226,5.5611020141,0.7870390008  
 H, 2.2564249052,6.1846058522,2.2953425329  
 Cl, 1.2805411455,7.1621213433,0.3552257124  
 H, 0.764836122,-0.8897071871,-1.3139575823

|                                              |                             |
|----------------------------------------------|-----------------------------|
| Zero-point correction=                       | 0.629504 (Hartree/Particle) |
| Thermal correction to Energy=                | 0.670013                    |
| Thermal correction to Enthalpy=              | 0.670957                    |
| Thermal correction to Gibbs Free Energy=     | 0.549902                    |
| Sum of electronic and zero-point Energies=   | -2187.349504                |
| Sum of electronic and thermal Energies=      | -2187.308996                |
| Sum of electronic and thermal Enthalpies=    | -2187.308051                |
| Sum of electronic and thermal Free Energies= | -2187.429106                |

**E**

C, 1.4529051222,0.6711138824,-4.251681665  
 C, 2.0797399459,0.9560307023,-2.8904166704  
 H, 0.8118675561,1.5096877829,-4.5301013545  
 H, 2.7472699365,1.8142449037,-2.9510216917  
 H, 2.6625999745,0.0927997469,-2.5533395907  
 O, 0.5948233836,-0.4637672352,-4.2100593203  
 C, 2.4998222193,0.4450032677,-5.345522265  
 H, 1.9993755751,0.1493965759,-6.2638903652  
 H, 3.223258905,-0.3205570503,-5.0609959651  
 Cl, 3.4564403207,1.9431605743,-5.7268956947

C, 0.31727086,4.8809378973,2.2871626171  
C, -0.9759145122,4.7859211272,2.7929368875  
C, -1.6684772031,3.5804936502,2.7086611586  
C, -1.0866958781,2.4548146973,2.1158098569  
C, 0.2416631613,2.5427581721,1.633217996  
C, 0.9202160568,3.7640113384,1.7145850941  
H, 0.856244655,5.8201619733,2.3337447672  
H, -1.4476206887,5.6461494614,3.2538572992  
H, -2.6621989216,3.4942913298,3.1330306058  
H, 1.911252359,3.8422370319,1.2824239804  
N, -1.7333950892,1.2121701295,2.0603264709  
N, 0.7875107307,1.4178295264,1.0025795185  
C, -2.9752688318,1.1199406408,1.7341884119  
H, -3.5488647938,2.0046311688,1.4330377005  
C, 1.9949207311,1.0701295652,1.2036908295  
H, 2.6349832149,1.5943292307,1.9276204133  
C, -3.6777812672,-0.1458684105,1.7249752021  
C, -5.0472991152,-0.1807727668,1.3946833079  
C, -3.0070327309,-1.3557492283,2.0312724117  
C, -5.7823455869,-1.3573327507,1.3675406249  
H, -5.5204307505,0.7645291451,1.1570987926  
C, -3.7388956522,-2.5496808593,2.0043852913  
C, -5.0846243981,-2.5419209315,1.6841297986  
H, -3.2219341973,-3.472600151,2.2384129308  
H, -5.6108402481,-3.4901339542,1.6778438107  
C, 2.6256477844,-0.0809551319,0.551003009  
C, 3.9184210143,-0.4258937226,0.9936851802  
C, 2.0261461017,-0.9050952552,-0.4198695198  
C, 4.6151719623,-1.5476615046,0.5551839853  
H, 4.3634406794,0.2257005077,1.7350785717  
C, 2.6955834915,-2.0492423708,-0.8524041367  
C, 3.9591089738,-2.3661433977,-0.377126088  
H, 2.1915949627,-2.6968640596,-1.5606249225  
H, 4.4363098391,-3.2674497639,-0.7433113582  
O, -1.7070243661,-1.4000313445,2.3428538529  
H, -1.3598194817,-0.4713471199,2.2872218659  
O, 0.7569271102,-0.7476715529,-0.9428802527  
H, 1.0611491445,-1.198402425,-3.795046626  
C, 6.0210159169,-1.9174620526,1.0578831045  
C, 6.5578177375,-0.9070331649,2.0874560873  
H, 7.5564997606,-1.2110556468,2.4109051055  
H, 6.6411390655,0.0990442272,1.6671228772  
H, 5.9253856415,-0.8572669497,2.9780042366  
C, 5.9760179568,-3.3109801387,1.7267485092

H, 6.9692585506,-3.5874191931,2.0927306584  
 H, 5.2868448265,-3.3148464174,2.5752482174  
 H, 5.6518766025,-4.0871641839,1.0296384974  
 C, 6.9994021966,-1.9536120478,-0.13912664  
 H, 6.697673039,-2.6889119252,-0.8889323716  
 H, 7.0543942602,-0.9775461387,-0.628849929  
 H, 8.0046967485,-2.2196424083,0.2008993802  
 C, -7.2785449413,-1.414818731,1.0158257223  
 C, -7.8551231192,-0.023968077,0.6958300278  
 H, -7.3576924817,0.4343521189,-0.1633146699  
 H, -8.9172602297,-0.1138056643,0.4525706879  
 H, -7.7690704694,0.657510515,1.5468647656  
 C, -7.4853136457,-2.3173466097,-0.22264142  
 H, -6.9436618933,-1.9224209578,-1.0862644453  
 H, -7.1323251207,-3.3360331237,-0.045397433  
 H, -8.5473897495,-2.3735403983,-0.4815311676  
 C, -8.0677296389,-1.9983642761,2.2110475333  
 H, -7.9434463654,-1.3750176678,3.1007921016  
 H, -9.135675507,-2.0487403007,1.9761197072  
 H, -7.7352345665,-3.008248254,2.4628011913  
 C, 0.2086704271,0.4286305005,-1.4165819492  
 O, 1.0908639113,1.3300941496,-1.9197390784  
 O, -0.9631769715,0.5954287734,-1.4008980635

|                                              |                             |
|----------------------------------------------|-----------------------------|
| Zero-point correction=                       | 0.630965 (Hartree/Particle) |
| Thermal correction to Energy=                | 0.670948                    |
| Thermal correction to Enthalpy=              | 0.671892                    |
| Thermal correction to Gibbs Free Energy=     | 0.553347                    |
| Sum of electronic and zero-point Energies=   | -2187.343070                |
| Sum of electronic and thermal Energies=      | -2187.303086                |
| Sum of electronic and thermal Enthalpies=    | -2187.302142                |
| Sum of electronic and thermal Free Energies= | -2187.420687                |

#### E'

C, -0.6366442068,-2.1065464359,-5.2871201927  
 C, 0.7553843859,-2.0631849757,-5.281218094  
 C, 1.432130334,-1.6542123617,-4.1367028124  
 C, 0.7280612949,-1.3088854427,-2.9813022839  
 C, -0.6854959186,-1.3632640739,-2.97150663  
 C, -1.3464139935,-1.7519474129,-4.1450642835  
 H, -1.1701837748,-2.3952053127,-6.1851429543  
 H, 1.3157353535,-2.3144318223,-6.1737356986  
 H, 2.5117134991,-1.5687509938,-4.155524083  
 H, -2.4297931874,-1.7401256744,-4.1593188633  
 N, 1.3842097837,-0.8996653862,-1.8040668397  
 N, -1.3546308698,-0.961258611,-1.8131209866

C, 2.621760575,-1.2303337502,-1.4527197123  
H, 3.1243803916,-1.9517205917,-2.0903201142  
C, -2.3712821413,-1.6273071925,-1.4161039725  
H, -2.649532619,-2.5594953194,-1.9284064775  
C, 3.3038132561,-0.732343478,-0.3400812873  
C, 4.6291427235,-1.1998199558,-0.0725478906  
C, 2.6865926481,0.2660245621,0.519024082  
C, 5.3761352024,-0.7315570236,0.9754628323  
H, 5.0317638436,-1.9504176729,-0.7432447225  
C, 3.5040940882,0.7519277075,1.5962593271  
C, 4.7654411319,0.2687337814,1.8028072155  
H, 3.078914306,1.5120556355,2.2412205655  
H, 5.3309269278,0.6677125941,2.6384064134  
C, -3.2445826854,-1.3152512032,-0.2831194811  
C, -4.1179978307,-2.3435805755,0.1166780976  
C, -3.2924518583,-0.0889042375,0.4126125216  
C, -5.0074447046,-2.2218303507,1.1793419811  
H, -4.069922061,-3.2693072278,-0.4427599117  
C, -4.1810847877,0.0634953619,1.4766261239  
C, -5.0100322,-0.9896531585,1.8457021946  
H, -4.2154310674,0.9973342141,2.0123770461  
H, -5.681684592,-0.8272971962,2.6808488969  
O, 1.5028636774,0.6728494793,0.3159805389  
O, -2.4603473513,0.8961570494,-0.0692771003  
C, -5.952826446,-3.350819181,1.6234347453  
C, -5.7891637022,-4.6192988051,0.7669324035  
H, -6.478374272,-5.3908031988,1.119719124  
H, -6.0172118704,-4.4324043489,-0.2861682096  
H, -4.7767528977,-5.027375264,0.8330443175  
C, -5.6545386545,-3.7202530053,3.095033568  
H, -6.3189595097,-4.5239744037,3.426466921  
H, -4.6225007962,-4.0619942002,3.2108486269  
H, -5.8013335277,-2.8702509753,3.7652872309  
C, -7.4177386107,-2.8706007421,1.5017945904  
H, -7.6101694736,-1.9933138118,2.1235326536  
H, -7.6577095861,-2.6070792838,0.4681320425  
H, -8.1042396323,-3.6610525399,1.8197890295  
C, 6.8000316113,-1.2103136787,1.2955457319  
C, 6.8295093133,-1.8322555032,2.7115267916  
H, 6.1594034352,-2.6941125126,2.7711846997  
H, 7.8410928128,-2.1687264524,2.9591382609  
H, 6.5220117346,-1.1168498753,3.477953348  
C, 7.2935281545,-2.2714759797,0.2962571316  
H, 6.6623111714,-3.1644577154,0.3072186911

H, 7.3241225274,-1.8832197317,-0.7257102151  
 H, 8.3076758278,-2.582122462,0.560876246  
 C, 7.775187469,-0.0108413226,1.2433138065  
 H, 7.5080315632,0.7648274328,1.964969324  
 H, 8.7939495433,-0.3384540053,1.4722516445  
 H, 7.7790672924,0.4450109893,0.24952159  
 C, -2.2729511389,2.1069037158,0.5208218107  
 O, -2.7734688001,2.5006154327,1.537968999  
 O, -1.4447648126,2.7713724965,-0.2813519039  
 H, 0.9346193202,2.0190285272,1.1879267696  
 C, 0.5553925076,3.8240318705,0.5449825235  
 C, -0.9210330179,4.0286026126,0.2049046935  
 O, 0.6849873228,2.8841588111,1.5899028186  
 H, 1.0774903323,3.4806478076,-0.3558023466  
 H, -1.0590615427,4.7470657167,-0.6022971798  
 H, -1.4803157186,4.3339235122,1.0894103064  
 C, 1.2161912203,5.1059344037,1.0488861023  
 H, 2.2475596848,4.9000924138,1.3212652038  
 H, 0.6843825794,5.5127749829,1.9075810636  
 Cl, 1.2643415696,6.4241239497,-0.210876162  
 H, 0.8922344435,-0.2802416244,-1.1409382373

|                                              |                             |
|----------------------------------------------|-----------------------------|
| Zero-point correction=                       | 0.633374 (Hartree/Particle) |
| Thermal correction to Energy=                | 0.672732                    |
| Thermal correction to Enthalpy=              | 0.673676                    |
| Thermal correction to Gibbs Free Energy=     | 0.557665                    |
| Sum of electronic and zero-point Energies=   | -2187.373571                |
| Sum of electronic and thermal Energies=      | -2187.334213                |
| Sum of electronic and thermal Enthalpies=    | -2187.333268                |
| Sum of electronic and thermal Free Energies= | -2187.449280                |

## F

C, -0.7644509847,1.0264289417,-4.9483144926  
 C, -1.9443184159,0.0331019736,-5.0154984727  
 H, -0.4748589302,1.384966624,-5.9378105668  
 H, -2.3860705269,-0.0425781911,-6.0073882139  
 H, -2.7170661839,0.2532214386,-4.2787196379  
 O, 0.3154158807,0.2196655487,-4.4406473575  
 C, -0.9637212166,2.197384887,-4.0013341146  
 H, -0.0565168452,2.7902872969,-3.9169519456  
 H, -1.2859980356,1.8537407105,-3.0217852444  
 Cl, -2.2565172464,3.2849616609,-4.6646612174  
 C, 1.5608084358,4.1523121242,2.4333409964  
 C, 0.1776660095,4.305538746,2.5051586152  
 C, -0.6536921012,3.368697683,1.8983972138  
 C, -0.1182104383,2.2694144221,1.2177791372



C, 1.2889194685,2.1052682691,1.1482932569  
C, 2.108712008,3.0638210126,1.7615126231  
H, 2.2146849688,4.889802669,2.8851145072  
H, -0.2530344332,5.1626802786,3.0096883733  
H, -1.7289035401,3.5076215344,1.912654367  
H, 3.1843430987,2.9633202374,1.673631176  
N, -0.9138590369,1.3290165426,0.5486766174  
N, 1.7809392272,1.0211479287,0.4247171068  
C, -2.0228182053,0.8959145774,1.0303165465  
H, -2.3733856921,1.197262703,2.0251973268  
C, 2.7540678645,0.3259944971,0.8763754218  
H, 3.1754277516,0.5387830186,1.8713883209  
C, -2.8576654856,-0.0424179572,0.2987017467  
C, -4.0559377272,-0.4988685091,0.868065558  
C, -2.4755941777,-0.5272273127,-0.9781670568  
C, -4.900471628,-1.4082847739,0.2333063459  
H, -4.3158667783,-0.1132785213,1.8489566757  
C, -3.3056092542,-1.444441208,-1.6221303793  
C, -4.4886242878,-1.8688172178,-1.0270748763  
H, -2.9956513893,-1.8360527447,-2.5838545812  
H, -5.0939902136,-2.5855594633,-1.5666579629  
C, 3.3873512339,-0.8029234193,0.2011091184  
C, 4.4659247113,-1.4214876879,0.8640442744  
C, 2.9679476736,-1.3303206693,-1.0422170822  
C, 5.1467751608,-2.5248470391,0.3624561722  
H, 4.7572500656,-0.9958102854,1.8168379919  
C, 3.6394589503,-2.4481326887,-1.5563682756  
C, 4.6974476924,-3.0242137395,-0.8722754449  
H, 3.3146005005,-2.8595529943,-2.5065766491  
H, 5.1819649924,-3.8867700848,-1.3162804068  
O, -1.3414529796,-0.1285136049,-1.5897969863  
H, -0.8221926444,0.4250883518,-0.9430081548  
O, 1.9467263337,-0.7587483063,-1.695500691  
H, 1.6958070459,-1.2801502172,-2.4794692177  
C, 6.3247102812,-3.1973635826,1.0879783115  
C, 6.6605921064,-2.5023951834,2.4199037611  
H, 7.5032725621,-3.009885777,2.8971386385  
H, 6.946119767,-1.457259231,2.2718078205  
H, 5.8193557628,-2.5329755398,3.1178573147  
C, 5.9714180563,-4.6719826899,1.3910384883  
H, 6.8027977791,-5.1673591659,1.9025102042  
H, 5.0888634175,-4.7358488166,2.0332679367  
H, 5.7603196168,-5.2341295347,0.4782780603  
C, 7.5823282556,-3.147355876,0.1898850972

|                                              |                             |
|----------------------------------------------|-----------------------------|
| H, 7.4225132315,-3.6612632168,-0.761048271   |                             |
| H, 7.8609194765,-2.1137074288,-0.0327934202  |                             |
| H, 8.428809847,-3.628443395,0.6900996949     |                             |
| C, -6.2009852775,-1.8682400658,0.9166557802  |                             |
| C, -6.9924536192,-2.8628923581,0.0477219763  |                             |
| H, -6.4203665303,-3.7725342695,-0.1541582564 |                             |
| H, -7.906800228,-3.1583759226,0.5690630115   |                             |
| H, -7.286290684,-2.4229736798,-0.9093081765  |                             |
| C, -5.8634534843,-2.562478301,2.2564164419   |                             |
| H, -5.2289340106,-3.4376503016,2.092927425   |                             |
| H, -5.3359486501,-1.8916036949,2.9387367867  |                             |
| H, -6.7790320696,-2.8933401984,2.7565959652  |                             |
| C, -7.1049638168,-0.6437035562,1.1898542095  |                             |
| H, -7.3631280016,-0.1337204404,0.2578113757  |                             |
| H, -8.0340845941,-0.9567133941,1.6760983835  |                             |
| H, -6.6167220562,0.0830160189,1.8436819195   |                             |
| C, -0.0765403276,-1.0617295188,-4.2884492641 |                             |
| O, -1.3477537107,-1.2352910792,-4.6863564088 |                             |
| O, 0.6335170153,-1.9332862129,-3.8755323968  |                             |
| Zero-point correction=                       | 0.632205 (Hartree/Particle) |
| Thermal correction to Energy=                | 0.672044                    |
| Thermal correction to Enthalpy=              | 0.672988                    |
| Thermal correction to Gibbs Free Energy=     | 0.554603                    |
| Sum of electronic and zero-point Energies=   | -2187.381578                |
| Sum of electronic and thermal Energies=      | -2187.341739                |
| Sum of electronic and thermal Enthalpies=    | -2187.340795                |
| Sum of electronic and thermal Free Energies= | -2187.459181                |

## G

C, -0.6342987477,6.5746446879,6.6364358608  
 C, -0.7872510573,7.7189460798,5.7354234012  
 H, 0.3688224954,6.2969922262,6.9465625494  
 H, 0.1004508794,8.2468773945,5.4050758585  
 H, -1.7157250557,8.283897827,5.7401044482  
 O, -0.9009163346,6.3714761741,5.2413927327  
 C, -1.7569768128,6.138445281,7.5348132471  
 H, -1.7432598559,5.0626433339,7.7015724733  
 H, -2.7213167072,6.4368402245,7.1291389351  
 Cl, -1.6066549527,6.9053767172,9.1815892229  
 C, 0.0999326906,3.013228699,0.1347549288  
 C, 1.2549811426,2.4965997062,0.7150803778  
 C, 1.9642427124,3.2580172215,1.6390032797  
 C, 1.5361424279,4.5415283048,1.9995577055  
 C, 0.340224491,5.0515554734,1.4395511763  
 C, -0.3487371788,4.2800225776,0.4954300165

H, -0.4498909461,2.435985507,-0.5995504604  
H, 1.6039935424,1.5045442242,0.4529813307  
H, 2.8433079391,2.8448269433,2.1200506278  
H, -1.2254984974,4.6990278999,0.0154893431  
N, 2.2130679579,5.3101509936,2.9597425198  
N, -0.0630429158,6.3508469094,1.7842091336  
C, 3.4996667056,5.3650384062,2.9754481922  
H, 4.0966706944,4.8753336477,2.196397768  
C, -1.3089235919,6.6425249179,1.9242089459  
H, -2.0841609287,5.8712371749,1.851087221  
C, 4.231610215,6.0810169374,3.9997850785  
C, 5.6399591892,6.1163535988,3.9517104176  
C, 3.5579478492,6.7479385818,5.0510135571  
C, 6.4056613024,6.7790631671,4.9003935966  
H, 6.1175536741,5.5962881969,3.129927444  
C, 4.3192239917,7.418773866,6.0146116901  
C, 5.700742632,7.4293212001,5.9344117955  
H, 3.8011232908,7.9288113269,6.8178599274  
H, 6.2502976862,7.9629990624,6.7015291338  
C, -1.7622320339,7.9914841594,2.1976009171  
C, -3.1381991305,8.2574431568,2.2873152945  
C, -0.839832506,9.0543439795,2.3811531184  
C, -3.6492131274,9.5283744506,2.537853225  
H, -3.8145371433,7.4201678556,2.1476720964  
C, -1.3391051937,10.3331582162,2.6375746266  
C, -2.7076871117,10.5582972438,2.7096337109  
H, -0.6317985374,11.1420446609,2.7764144043  
H, -3.0429321329,11.5682816991,2.9061387092  
O, 2.220661842,6.7588804827,5.1576605114  
H, 1.8449874466,6.2498885062,4.3907719062  
O, 0.4867271514,8.8686520787,2.331557574  
H, 0.6437167708,7.9096549893,2.1301330916  
C, -5.1704569446,9.75804828,2.6053134926  
C, -5.7834078845,8.8746368887,3.7162373532  
H, -6.8663348979,9.0237811269,3.7686439343  
H, -5.6034479832,7.8120479622,3.5362689198  
H, -5.3584837855,9.1253849226,4.6920100214  
C, -5.5235279709,11.225066612,2.9122819485  
H, -6.6098732957,11.3400176611,2.9539239471  
H, -5.1208306376,11.5476751613,3.8764475864  
H, -5.1505367437,11.9038959759,2.1404743056  
C, -5.8085153914,9.3842981762,1.2469427611  
H, -5.3948418232,9.995687694,0.4404269827  
H, -5.6341183193,8.3358058101,0.9933956754

|                                              |                             |
|----------------------------------------------|-----------------------------|
| H, -6.8908719899,9.5445913573,1.2752082648   |                             |
| C, 7.9423706715,6.8323462538,4.8638487424    |                             |
| C, 8.5129601928,6.2171677876,6.162826996     |                             |
| H, 8.2045779295,5.173439987,6.2678234273     |                             |
| H, 9.6068067744,6.2499066092,6.1514539312    |                             |
| H, 8.1746670072,6.7560324928,7.0510538835    |                             |
| C, 8.5221270882,6.0524954038,3.6698017883    |                             |
| H, 8.2538626488,4.99288565,3.706694957       |                             |
| H, 8.1820402738,6.4605381661,2.7139657968    |                             |
| H, 9.6133217694,6.1157893204,3.6843699149    |                             |
| C, 8.404799968,8.3034423173,4.7482525149     |                             |
| H, 8.0586751028,8.9058393931,5.5916191441    |                             |
| H, 9.4975606307,8.3589729883,4.7265985605    |                             |
| H, 8.0221625297,8.7613142932,3.8321556086    |                             |
| Zero-point correction=                       | 0.615205 (Hartree/Particle) |
| Thermal correction to Energy=                | 0.653025                    |
| Thermal correction to Enthalpy=              | 0.653969                    |
| Thermal correction to Gibbs Free Energy=     | 0.538863                    |
| Sum of electronic and zero-point Energies=   | -1998.744351                |
| Sum of electronic and thermal Energies=      | -1998.706531                |
| Sum of electronic and thermal Enthalpies=    | -1998.705587                |
| Sum of electronic and thermal Free Energies= | -1998.820692                |

### G'

C, 0.7403570147,-1.184241153,2.482573027  
 C, 1.3241157066,-1.5034663198,1.1783090866  
 H, -0.3121225832,-0.9156666537,2.5178458828  
 H, 0.6838270161,-1.4531134682,0.3044937045  
 H, 2.1843553452,-2.1666267864,1.1318522591  
 O, 1.5808000682,-0.2327401744,1.8148425592  
 C, 1.3304318303,-1.7167148334,3.7579484485  
 H, 1.2036793411,-1.0165250082,4.5821758959  
 H, 2.3855877422,-1.9500918283,3.6315534338  
 Cl, 0.4976531811,-3.2538700647,4.2701120252  
 C, 0.2372136902,5.4695549398,1.7913164055  
 C, -1.0936262137,5.235461109,2.1289565403  
 C, -1.7380787158,4.0925165414,1.667022027  
 C, -1.0666958296,3.1827999715,0.8464517038  
 C, 0.2866965037,3.4079085633,0.5074889746  
 C, 0.9193183163,4.5588815464,0.9905725214  
 H, 0.7428307985,6.3601198137,2.1455171684  
 H, -1.6290786646,5.9331302084,2.7617913928  
 H, -2.757363692,3.8908307284,1.9733348832  
 H, 1.9433001944,4.7524461233,0.693216665  
 N, -1.6721024125,2.0065386914,0.3747314139

N, 0.9155862599,2.5131852474,-0.3698398776  
C, -2.9748114782,1.7874692292,0.2075288494  
H, -3.6448998329,2.6238798115,0.385860987  
C, 2.1034657046,2.0761324678,-0.1234378322  
H, 2.6063953765,2.3212405014,0.8169274294  
C, -3.4988939772,0.5602561965,-0.1955182286  
C, -4.9118563433,0.4229198996,-0.3776594453  
C, -2.6045774666,-0.5741981075,-0.42940978  
C, -5.4913006178,-0.7540827133,-0.7662799563  
H, -5.5194254463,1.3015174227,-0.1919811648  
C, -3.2541831438,-1.7950529994,-0.833818852  
C, -4.6077551455,-1.8659468942,-0.9891693436  
H, -2.6191386882,-2.6545912426,-1.0138921168  
H, -5.0355523274,-2.8142844809,-1.2979238761  
C, 2.8330186622,1.2373338227,-1.04960963  
C, 4.1117659902,0.773400352,-0.6965723539  
C, 2.2909382978,0.8780207117,-2.3112852263  
C, 4.8851343038,-0.0234447787,-1.5350580677  
H, 4.487260813,1.0582767102,0.2807997193  
C, 3.0599495755,0.0826227292,-3.1640161812  
C, 4.3208353763,-0.3524372305,-2.7806611234  
H, 2.6435089415,-0.1885417468,-4.1265918406  
H, 4.8743261466,-0.9685328064,-3.4773855697  
O, -1.355026107,-0.4854170085,-0.2847822608  
H, -1.0937288141,1.1807941679,0.127308729  
O, 1.0765480094,1.2747024273,-2.7137576747  
H, 0.6745005963,1.7976574258,-1.9791000298  
C, 6.2772728094,-0.5051785691,-1.0873573997  
C, 6.1398130038,-1.3642805972,0.1910453232  
H, 7.1218290037,-1.7133701261,0.5255682277  
H, 5.6892746178,-0.799457186,1.010697664  
H, 5.5129925591,-2.2408250207,0.0051856267  
C, 6.9716810611,-1.3584800258,-2.1648636207  
H, 7.9532554974,-1.6765196315,-1.8035631422  
H, 6.4006857673,-2.2604022236,-2.4019235452  
H, 7.1268999365,-0.7979869086,-3.0909135762  
C, 7.1783940574,0.7148172818,-0.7876802381  
H, 7.2934377294,1.3414079136,-1.6762314241  
H, 6.764653904,1.3375060881,0.0090422757  
H, 8.1730964736,0.3863923805,-0.4706555204  
C, -7.0019420752,-0.940804992,-0.9695704067  
C, -7.5222057044,-2.0339135869,-0.0066237526  
H, -7.3557451453,-1.7454118088,1.034788664  
H, -8.5960586387,-2.1893140175,-0.1502547287

|                                              |                             |
|----------------------------------------------|-----------------------------|
| H, -7.0242628119,-2.9925267789,-0.1703020472 |                             |
| C, -7.7894351566,0.3526628882,-0.6950047794  |                             |
| H, -7.660783671,0.6947703822,0.3356858121    |                             |
| H, -7.4886390537,1.1614302326,-1.3667968864  |                             |
| H, -8.8565106245,0.173839765,-0.8519191945   |                             |
| C, -7.278439814,-1.3711644202,-2.4293905134  |                             |
| H, -6.7770014187,-2.3089572184,-2.67947658   |                             |
| H, -8.3516223761,-1.5168587991,-2.5874219459 |                             |
| H, -6.9301122332,-0.6091420221,-3.131767643  |                             |
| Zero-point correction=                       | 0.615060 (Hartree/Particle) |
| Thermal correction to Energy=                | 0.653073                    |
| Thermal correction to Enthalpy=              | 0.654017                    |
| Thermal correction to Gibbs Free Energy=     | 0.537067                    |
| Sum of electronic and zero-point Energies=   | -1998.739747                |
| Sum of electronic and thermal Energies=      | -1998.701734                |
| Sum of electronic and thermal Enthalpies=    | -1998.700790                |
| Sum of electronic and thermal Free Energies= | -1998.817740                |

## H

C, 1.000961268,-3.2016829124,1.8344165093  
 C, 1.7471468015,-1.9236570813,2.2053283826  
 H, 1.7395601686,-4.0110433618,1.7428716292  
 H, 2.3432563708,-2.0644623784,3.1111294589  
 H, 1.0433869645,-1.0963083382,2.3433498614  
 O, 0.2900377563,-3.0352009689,0.6237339004  
 C, -0.0536536741,-3.5978876397,2.8613887947  
 H, -0.6048757586,-4.4612866221,2.4982248889  
 H, -0.7416670765,-2.7787038383,3.056141907  
 Cl, 0.6852879788,-4.0833240778,4.4540080385  
 C, -0.7941642834,-2.486704979,-4.8183888919  
 C, 0.5970668011,-2.5179444227,-4.8462106328  
 C, 1.32258571,-2.0928794156,-3.7360601297  
 C, 0.6712881588,-1.6358282705,-2.5863357826  
 C, -0.7429077108,-1.5890558989,-2.5602896052  
 C, -1.4555384248,-2.0226889892,-3.6846561681  
 H, -1.3664919093,-2.8364562608,-5.669790521  
 H, 1.1192934316,-2.8891558649,-5.7204404265  
 H, 2.4052258176,-2.1478253787,-3.7344174627  
 H, -2.5388871421,-2.0257797953,-3.6482862156  
 N, 1.3768466255,-1.2656441848,-1.4269997471  
 N, -1.3766507192,-1.1227825311,-1.396952837  
 C, 2.2803898577,-0.3635556788,-1.4970183778  
 H, 2.4620435403,0.1513951462,-2.4502318259  
 C, -2.365644134,-0.308321885,-1.4826963746  
 H, -2.6892591927,0.0842640759,-2.455524319

C, 3.0782574904,0.1548325788,-0.3818108059  
C, 3.7726381549,1.3585559616,-0.6012442205  
C, 3.1359917125,-0.4304797206,0.8988558431  
C, 4.4688490531,2.0281655086,0.4020608617  
H, 3.7270359603,1.7782985083,-1.598651361  
C, 3.8127260129,0.232893939,1.9224682337  
C, 4.4574722326,1.4380314195,1.6755385158  
H, 3.8540066154,-0.2100396051,2.9100519259  
H, 4.975284466,1.9179193926,2.4982204775  
C, -3.1045656015,0.1742324781,-0.3294604784  
C, -4.1517719572,1.0890042469,-0.5322654421  
C, -2.7939877003,-0.2303653028,0.9933434192  
C, -4.9104204009,1.6230927536,0.5058381779  
H, -4.3600879563,1.3801980188,-1.5571278881  
C, -3.5489492906,0.2972498075,2.0433054003  
C, -4.5769700282,1.1985976543,1.8026203419  
H, -3.3101347643,-0.015762281,3.0527722673  
H, -5.1280679065,1.5749458306,2.6546070072  
O, 2.5835312631,-1.6571195058,1.067790294  
H, 0.8221547523,-2.4864119122,0.0114541951  
O, -1.8112896294,-1.0942648023,1.2923553271  
H, -1.3712831192,-1.4194603302,0.4727567685  
C, -6.0412602701,2.6249744758,0.2100571618  
C, -7.0968206528,1.9619682029,-0.7047963123  
H, -7.9070591496,2.6639825372,-0.9256544867  
H, -6.6651751086,1.6430418329,-1.656674767  
H, -7.5311314463,1.0813732962,-0.223851354  
C, -6.7486184051,3.096497149,1.4938820836  
H, -7.5379670193,3.8080732741,1.2376498249  
H, -7.2151790329,2.2657640059,2.0303272764  
H, -6.0587569908,3.6011379479,2.1759336676  
C, -5.4587028798,3.8687907128,-0.5002206046  
H, -4.7099249598,4.3603474673,0.1267713494  
H, -4.9811958631,3.6081006386,-1.4478249948  
H, -6.2515648496,4.5920556971,-0.7152770258  
C, 5.2160468493,3.3530560944,0.1702466961  
C, 6.710152088,3.17049842,0.5244509081  
H, 7.1671609271,2.3973857786,-0.0990725372  
H, 7.2554279639,4.1051852719,0.3621543437  
H, 6.8486515138,2.8823513983,1.5690846683  
C, 5.1250039001,3.8249693967,-1.2921700522  
H, 5.5645474277,3.0991341247,-1.9820019853  
H, 4.091394769,4.0086424658,-1.5980140665  
H, 5.6732751925,4.7634040491,-1.4093251642

|                                              |                             |
|----------------------------------------------|-----------------------------|
| C, 4.6055272464,4.4512017499,1.0714742243    |                             |
| H, 4.6784153926,4.1936220502,2.1306497355    |                             |
| H, 5.1294865943,5.4002453846,0.9226909344    |                             |
| H, 3.5487519887,4.6055757117,0.8374191328    |                             |
| Zero-point correction=                       | 0.617728 (Hartree/Particle) |
| Thermal correction to Energy=                | 0.654496                    |
| Thermal correction to Enthalpy=              | 0.655440                    |
| Thermal correction to Gibbs Free Energy=     | 0.546113                    |
| Sum of electronic and zero-point Energies=   | -1998.763697                |
| Sum of electronic and thermal Energies=      | -1998.726928                |
| Sum of electronic and thermal Enthalpies=    | -1998.725984                |
| Sum of electronic and thermal Free Energies= | -1998.835312                |

### H'

C, -0.0504552805,-2.5384123185,1.2760587283  
 C, 0.8458447554,-1.4279800882,1.8577090917  
 H, -0.5002318544,-2.1533655875,0.3539066401  
 H, 0.1789547576,-0.7478545811,2.3814755534  
 H, 1.5964764675,-1.8124807871,2.5509508121  
 O, -1.0254577899,-2.8186486414,2.2566534274  
 C, 0.6008514052,-3.8871652102,0.9916630929  
 H, -0.183570442,-4.6152994804,0.8070106082  
 H, 1.2209256146,-4.2255583664,1.8211954845  
 Cl, 1.6551444438,-3.8907389026,-0.4959840275  
 C, -0.9342053667,5.4655172455,-0.6875535836  
 C, 0.4584520515,5.4941657771,-0.8472555688  
 C, 1.1854150885,4.3272949452,-0.6896143156  
 C, 0.530855598,3.1233583296,-0.4051036872  
 C, -0.8845861817,3.0614243715,-0.2559269662  
 C, -1.5866453531,4.2856740318,-0.3842444222  
 H, -1.5038772216,6.3839458678,-0.7753751054  
 H, 0.9688436742,6.4260126251,-1.056316542  
 H, 2.2658524349,4.3654453918,-0.7574634032  
 H, -2.6543817673,4.2921927952,-0.2072569721  
 N, 1.2220710949,1.9116596113,-0.2135632795  
 N, -1.4465267666,1.8531853709,0.0630810847  
 C, 2.4828525632,1.6739374223,-0.4820363754  
 H, 3.0081873553,2.4719674967,-0.9943086342  
 C, -2.6892691898,1.6238963934,-0.2843161956  
 H, -3.1617632288,2.3334914693,-0.9777154449  
 C, 3.269810368,0.5321463358,-0.1441179074  
 C, 4.6395891445,0.5714901097,-0.5078202327  
 C, 2.7835054859,-0.5795208081,0.5940976869  
 C, 5.5386682647,-0.416146394,-0.1470077142  
 H, 4.9737956671,1.4288748016,-1.0783543094



C, 3.6884761885,-1.5695812142,0.9840073317  
C, 5.0221829918,-1.4812955306,0.6188447934  
H, 3.3482518911,-2.4287133091,1.5416816935  
H, 5.6808404303,-2.2828946093,0.931835717  
C, -3.5413718694,0.5454447376,0.0669428897  
C, -4.8071567178,0.518915955,-0.5861239338  
C, -3.2090708119,-0.4991059235,1.0271306666  
C, -5.7540267329,-0.4636130804,-0.4004842534  
H, -5.0132008759,1.3335372301,-1.2755314806  
C, -4.2077768149,-1.5256302481,1.176451421  
C, -5.4044929513,-1.5017895566,0.5083783783  
H, -3.9799426609,-2.335449983,1.8610695224  
H, -6.1025951114,-2.3104683091,0.6899370634  
O, 1.4691250625,-0.5814700386,0.8510488346  
O, -2.1313347523,-0.5237592147,1.6902157892  
H, -1.6120536162,-2.0129471834,2.2399706909  
C, -7.1005776953,-0.4165944917,-1.1470520024  
C, -6.855724993,-0.4257680725,-2.67397341  
H, -7.8061030178,-0.393982966,-3.2174403882  
H, -6.260716667,0.4339982347,-2.9911411182  
H, -6.3199467936,-1.3300568073,-2.9752594929  
C, -7.9978602311,-1.6209287537,-0.8044455523  
H, -8.9400068812,-1.5463226996,-1.3549489308  
H, -7.5280169252,-2.5690107704,-1.0807165269  
H, -8.2400503758,-1.657828045,0.2611975686  
C, -7.8649209255,0.8721542906,-0.7643180947  
H, -8.0620176297,0.901788561,0.3107956585  
H, -7.294581712,1.7680535869,-1.0217809063  
H, -8.8246655763,0.9234025493,-1.2896318745  
C, 7.0264408824,-0.3918073563,-0.5330146204  
C, 7.3597718958,-1.6512831167,-1.3660395211  
H, 6.763507939,-1.683842221,-2.2816724323  
H, 8.4167154206,-1.6492552583,-1.6479740666  
H, 7.1676764116,-2.5715670104,-0.8095717511  
C, 7.3879068133,0.8485270105,-1.3696493831  
H, 6.8292307604,0.8838032517,-2.3091929367  
H, 7.2051602235,1.7779821586,-0.8227617669  
H, 8.4507497454,0.8218876878,-1.6217211449  
C, 7.8900257095,-0.3790672615,0.7495455909  
H, 7.7114151009,-1.2600580376,1.370450885  
H, 8.9525887388,-0.3678828063,0.4899580381  
H, 7.6786460015,0.5061655003,1.35546364  
H, 0.6355313388,1.1681458949,0.1884838921

Zero-point correction=

0.618283 (Hartree/Particle)

|                                              |              |
|----------------------------------------------|--------------|
| Thermal correction to Energy=                | 0.654808     |
| Thermal correction to Enthalpy=              | 0.655752     |
| Thermal correction to Gibbs Free Energy=     | 0.547699     |
| Sum of electronic and zero-point Energies=   | -1998.725017 |
| Sum of electronic and thermal Energies=      | -1998.688492 |
| Sum of electronic and thermal Enthalpies=    | -1998.687548 |
| Sum of electronic and thermal Free Energies= | -1998.795600 |

## I

C, 1.1316591187,3.3776292853,-1.0650274631  
 C, 1.822075897,2.1487712419,-1.6444657998  
 H, 1.9020774271,4.1282909336,-0.8409935829  
 H, 2.4168325297,2.4131148981,-2.5226981869  
 H, 1.0841441503,1.3841071072,-1.9081338594  
 O, 0.4136995238,3.0391974089,0.1113743183  
 C, 0.0982770603,3.9837101037,-2.0084886622  
 H, -0.4050104011,4.808229504,-1.5121358113  
 H, -0.6268463527,3.2387897445,-2.3271205701  
 Cl, 0.8681161594,4.6748591737,-3.5082886153  
 C, -0.9379702374,1.2989436508,5.2486703716  
 C, 0.4518435788,1.2935498991,5.3228261361  
 C, 1.207098899,1.1027971854,4.1688157428  
 C, 0.5869204459,0.9185917317,2.9296088572  
 C, -0.8252669348,0.9078032928,2.8536153323  
 C, -1.5682728972,1.1042208506,4.0233490064  
 H, -1.5326386501,1.4713126871,6.1382454379  
 H, 0.9502470631,1.457596188,6.2711901893  
 H, 2.289829188,1.135107278,4.2098853963  
 H, -2.6494338519,1.1413669662,3.9570338699  
 N, 1.328240247,0.790361702,1.7393122758  
 N, -1.4255833537,0.7131347632,1.5986067592  
 C, 2.2054091484,-0.1354661686,1.6447279863  
 H, 2.3314130708,-0.8485308284,2.4705473898  
 C, -2.4448017416,-0.0598101154,1.4781381538  
 H, -2.8272336056,-0.6272046045,2.3362616097  
 C, 3.0437623932,-0.4278522208,0.4781010548  
 C, 3.705250473,-1.6699332942,0.4665038522  
 C, 3.1778082232,0.4143585329,-0.6426959477  
 C, 4.4434444397,-2.1276925944,-0.621992607  
 H, 3.6005179974,-2.2922000792,1.3468359654  
 C, 3.9006558957,-0.0308637948,-1.7491959109  
 C, 4.5132071747,-1.2769891562,-1.7365033409  
 H, 4.0033862387,0.6146008221,-2.6130287052  
 H, 5.0708633416,-1.5812006988,-2.6148422338  
 C, -3.1404292215,-0.2639295906,0.2201429788

C, -4.23654553,-1.1417565009,0.1825630201  
C, -2.7354590507,0.3802747008,-0.9760992383  
C, -4.9554559008,-1.4132377772,-0.9787099209  
H, -4.5179113744,-1.6198582716,1.1156232076  
C, -3.4462405935,0.1148596027,-2.1479554897  
C, -4.5260330922,-0.7582986875,-2.1448146181  
H, -3.1347984388,0.6092506087,-3.0604146915  
H, -5.0418863297,-0.9261012612,-3.0812543155  
O, 2.6548833382,1.6657497447,-0.5772669649  
H, 0.8889614406,2.3271948987,0.589976868  
O, -1.6998128098,1.2333690464,-1.0347571207  
H, -1.3121259153,1.3510985361,-0.1343783312  
C, -6.1499135752,-2.3840335852,-0.9470559114  
C, -7.2271180458,-1.8494833901,0.0249154128  
H, -8.0820025491,-2.5319840161,0.0602705666  
H, -6.8405138758,-1.7482294046,1.0418513992  
H, -7.5877150443,-0.8679580715,-0.2943097102  
C, -6.7975360067,-2.5529644011,-2.333675556  
H, -7.6383487973,-3.2481132288,-2.2635550944  
H, -7.1849640261,-1.6066185049,-2.7209551363  
H, -6.093297273,-2.960207231,-3.0643681943  
C, -5.6749051365,-3.7753524131,-0.4676495134  
H, -4.9131193711,-4.179879461,-1.1396140128  
H, -5.2458072606,-3.7339011196,0.5364546467  
H, -6.5138543363,-4.4777465569,-0.4414046752  
C, 5.1571211023,-3.4903237091,-0.6451172198  
C, 6.6727924137,-3.2735089414,-0.8620978552  
H, 7.1023864918,-2.6778286302,-0.052127793  
H, 7.1935195708,-4.2353939893,-0.8904836809  
H, 6.8793129045,-2.7568211242,-1.8022619425  
C, 4.9676316881,-4.2709260043,0.6681433756  
H, 5.3705811526,-3.7272845258,1.5271191645  
H, 3.9146090778,-4.4919952071,0.8630729196  
H, 5.4970379366,-5.2252009372,0.6061840357  
C, 4.5913889513,-4.3471692942,-1.8014011765  
H, 4.7369578982,-3.8668278526,-2.7717134946  
H, 5.0919568905,-5.3196267886,-1.8334691289  
H, 3.5197088544,-4.5198517966,-1.6711411087  
C, -0.3605005941,5.1967020246,1.7793551324  
O, -0.3669670298,4.5300381742,2.7277941956  
O, -0.3672579913,5.9104011709,0.8622666731

|                                 |                             |
|---------------------------------|-----------------------------|
| Zero-point correction=          | 0.630300 (Hartree/Particle) |
| Thermal correction to Energy=   | 0.671383                    |
| Thermal correction to Enthalpy= | 0.672327                    |

|                                              |              |
|----------------------------------------------|--------------|
| Thermal correction to Gibbs Free Energy=     | 0.550376     |
| Sum of electronic and zero-point Energies=   | -2187.397546 |
| Sum of electronic and thermal Energies=      | -2187.356463 |
| Sum of electronic and thermal Enthalpies=    | -2187.355519 |
| Sum of electronic and thermal Free Energies= | -2187.477470 |

I'

C, -1.0025949595,-2.2365883548,1.0998360026  
 C, -1.4438884024,-1.9062696504,-0.3316081153  
 H, -1.8723940062,-2.270433279,1.7635528104  
 H, -0.5797109669,-1.8860452025,-0.9906514987  
 H, -2.187523529,-2.603066373,-0.721860927  
 O, -0.1501390029,-1.2387039158,1.601055936  
 C, -0.2908208525,-3.5901461867,1.1595432862  
 H, 0.08581255,-3.7565216947,2.1650801908  
 H, 0.5238799981,-3.6357265186,0.4400599717  
 Cl, -1.418550353,-4.985836931,0.7907129425  
 C, 1.4102756783,5.1143921644,-1.5959838673  
 C, 0.0310240016,5.3560762105,-1.6098169349  
 C, -0.8385457597,4.3484809829,-1.227359541  
 C, -0.3407799034,3.1126690059,-0.8012400178  
 C, 1.0556795846,2.8434149416,-0.7668678111  
 C, 1.9088618141,3.8855239063,-1.2022340003  
 H, 2.0950822571,5.8867933601,-1.9278674706  
 H, -0.3582403985,6.3057556481,-1.9549410108  
 H, -1.9070895621,4.5110520662,-1.3027922608  
 H, 2.9730743027,3.6964091196,-1.2570183926  
 N, -1.1987418021,2.0615567789,-0.4137856956  
 N, 1.4631781938,1.5855006526,-0.3919981591  
 C, -2.4417375119,2.1876410149,-0.0233155018  
 H, -2.7924789999,3.2081196305,0.0862735198  
 C, 2.6634461642,1.4277660139,0.1081473844  
 H, 3.2258914024,2.329437493,0.3864980302  
 C, -3.3904115154,1.1650484288,0.2808791351  
 C, -4.6509050823,1.5838398644,0.7734100127  
 C, -3.137576014,-0.2227324668,0.1214151795  
 C, -5.6504799218,0.6937914589,1.12589976  
 H, -4.8113452647,2.6495263328,0.8778044041  
 C, -4.1409237372,-1.1314780084,0.4731635343  
 C, -5.3558093799,-0.6749332513,0.9601031515  
 H, -3.9749070655,-2.1943742257,0.3692176898  
 H, -6.1019644628,-1.4167925959,1.2201633477  
 C, 3.3827405501,0.2260866477,0.346964102  
 C, 4.7070777551,0.3838676354,0.8547841354  
 C, 2.8815625738,-1.1031142962,0.0512279982

C, 5.578766962,-0.661144415,1.0520050787  
 H, 5.0225445007,1.3974212624,1.0763793024  
 C, 3.8258807969,-2.1695130446,0.2363514363  
 C, 5.0925835078,-1.957060649,0.7116479466  
 H, 3.4848487403,-3.1692737951,-0.0095017854  
 H, 5.7454629632,-2.8158166818,0.8344307986  
 O, -1.9477810277,-0.5498094505,-0.39369366  
 O, 1.6892910289,-1.3407918737,-0.3284746517  
 H, 0.5797260331,-1.1294791016,0.9406643076  
 C, 7.0093736798,-0.496635746,1.5876714415  
 C, 7.1785348175,-1.3226099033,2.8843707883  
 H, 8.1967067772,-1.22112293,3.2741386855  
 H, 6.4817133747,-0.9812559965,3.6546932834  
 H, 6.9927332578,-2.3858810943,2.7149451847  
 C, 8.0208812201,-0.9987095943,0.5303431931  
 H, 9.0463952158,-0.900954215,0.9016837054  
 H, 7.8567371694,-2.0497895359,0.280395818  
 H, 7.9352610819,-0.4205251992,-0.3937669854  
 C, 7.3445713051,0.9705940425,1.9110566123  
 H, 7.2801142974,1.6061481499,1.0234695605  
 H, 6.6764571153,1.3791288334,2.6744069259  
 H, 8.3668377503,1.0406676096,2.2934619606  
 C, -7.0178019238,1.1289001284,1.6782272139  
 C, -7.2141493262,0.5271659066,3.0893171455  
 H, -6.439127521,0.8777071397,3.7760047841  
 H, -8.1865145131,0.8225859259,3.4939624238  
 H, -7.1797563956,-0.5647063282,3.0759602009  
 C, -7.1383189661,2.6595841474,1.7868569937  
 H, -6.389361068,3.080451134,2.4635326468  
 H, -7.0390971372,3.1472106601,0.8128414756  
 H, -8.1218251658,2.9212793461,2.1845267027  
 C, -8.1375436104,0.6200799777,0.7412202713  
 H, -8.132915477,-0.4688083491,0.6527906514  
 H, -9.1171263441,0.9160329555,1.1275957677  
 H, -8.0279625052,1.0379686863,-0.2631074883  
 H, -0.7644351154,1.1305482512,-0.4239371646  
 C, 1.2905852904,-0.2019540967,-2.9097256674  
 O, 2.4317573122,-0.1036471972,-3.0846575207  
 O, 0.133311527,-0.2845723665,-2.8218727042

|                                            |                             |
|--------------------------------------------|-----------------------------|
| Zero-point correction=                     | 0.631513 (Hartree/Particle) |
| Thermal correction to Energy=              | 0.672125                    |
| Thermal correction to Enthalpy=            | 0.673069                    |
| Thermal correction to Gibbs Free Energy=   | 0.553938                    |
| Sum of electronic and zero-point Energies= | -2187.368770                |

|                                              |              |
|----------------------------------------------|--------------|
| Sum of electronic and thermal Energies=      | -2187.328158 |
| Sum of electronic and thermal Enthalpies=    | -2187.327214 |
| Sum of electronic and thermal Free Energies= | -2187.446345 |

**J**

C, -1.2929233019,-2.6787853265,-1.7842902096  
 C, -1.6206407476,-1.2003148145,-1.6351510119  
 H, -2.2017247793,-3.2241327928,-2.0546771837  
 H, -1.7442374921,-0.7421892944,-2.6196232508  
 H, -0.8348501395,-0.6925299928,-1.0755094971  
 O, -0.7319676564,-3.2262674078,-0.5729648964  
 C, -0.205556035,-2.9419003735,-2.8248763431  
 H, 0.0747161427,-3.990734172,-2.7951489201  
 H, 0.6647689002,-2.3138091955,-2.6521596569  
 Cl, -0.7992072666,-2.6048574009,-4.5100267378  
 C, 0.5543659427,-1.8848028304,4.9896186725  
 C, -0.8356682598,-1.8116919186,4.9814465251  
 C, -1.4991547568,-1.3508708752,3.8488194149  
 C, -0.7896909962,-0.9622407112,2.7060549842  
 C, 0.622410098,-1.0380893169,2.7140830433  
 C, 1.2745227086,-1.4990329566,3.8635822462  
 H, 1.0777594836,-2.2644388262,5.8592919564  
 H, -1.4059926534,-2.133873024,5.8447611882  
 H, -2.5822079171,-1.3354093834,3.8184286684  
 H, 2.3539725428,-1.5955292674,3.8495104138  
 N, -1.4485457086,-0.5425875803,1.5383728513  
 N, 1.3249635219,-0.6728272303,1.5548923774  
 C, -2.3395577395,0.366626822,1.621561671  
 H, -2.523634646,0.886066202,2.5723813549  
 C, 2.3926193044,0.0410022552,1.620279569  
 H, 2.7422758648,0.4500038105,2.5758895375  
 C, -3.1650904883,0.8475723078,0.5051716895  
 C, -3.8115922591,2.0854804026,0.6773785046  
 C, -3.3754730876,0.1573926852,-0.6995739668  
 C, -4.6140147435,2.671066323,-0.2999874638  
 H, -3.6548513985,2.5938104952,1.6204749968  
 C, -4.1868163342,0.7130626584,-1.683313185  
 C, -4.786161012,1.9511978382,-1.4919796353  
 H, -4.354977498,0.151052375,-2.5946453372  
 H, -5.4088105614,2.3502464236,-2.2839413727  
 C, 3.1817713622,0.363318093,0.4452864016  
 C, 4.3197421566,1.175416862,0.5714153689  
 C, 2.8186296195,-0.1190073567,-0.837590021  
 C, 5.1190232194,1.5316923292,-0.5127113319  
 H, 4.5690382095,1.5294270329,1.5668479725

C, 3.6096314653,0.2285626578,-1.9318979162  
 C, 4.7293160913,1.0347906895,-1.7674258079  
 H, 3.3321687386,-0.1430866982,-2.9110883523  
 H, 5.3101160762,1.2758780693,-2.6480779219  
 O, -2.8697034904,-1.1110042949,-0.9134392157  
 H, -2.9057951711,-2.5560840171,0.0636324046  
 O, 1.7410509266,-0.9030388749,-1.0256564277  
 H, 1.3230231767,-1.0599759386,-0.1353972111  
 C, 6.3554121208,2.4262670833,-0.3085911584  
 C, 7.3412220203,1.7343213259,0.6611148921  
 H, 8.2246467753,2.3607871753,0.818650589  
 H, 6.8872079338,1.5488778781,1.6375710026  
 H, 7.6726325415,0.7730683905,0.2593223469  
 C, 7.0977138771,2.7008099132,-1.629131342  
 H, 7.9637880531,3.3396190106,-1.4372438412  
 H, 7.4645201707,1.778932765,-2.0888558995  
 H, 6.4623734286,3.2168697749,-2.3541601202  
 C, 5.9187740703,3.7840525495,0.2889782748  
 H, 5.2239881686,4.2992540975,-0.3798589305  
 H, 5.4228278888,3.6612699691,1.2548825898  
 H, 6.7878271674,4.4314191014,0.4416560683  
 C, -5.2988549838,4.036426881,-0.116574072  
 C, -6.8303995786,3.8661734856,-0.2474308951  
 H, -7.2149419816,3.1851037811,0.5164989688  
 H, -7.3297678438,4.831765447,-0.1248748935  
 H, -7.1142476486,3.4677495561,-1.2240719669  
 C, -5.0001565892,4.6600502498,1.258710548  
 H, -5.3617032424,4.0329358997,2.0783289066  
 H, -3.9304972025,4.8345009233,1.4036683147  
 H, -5.5037011294,5.6267907994,1.3392644328  
 C, -4.7952354238,5.0091801789,-1.2081662166  
 H, -5.0149335516,4.6415715782,-2.2131359089  
 H, -5.2782021703,5.9845681468,-1.0975858373  
 H, -3.7141605836,5.1544834155,-1.1339173888  
 C, -1.5024807649,-3.8419090603,0.3866620785  
 O, -2.7746996565,-3.4392707996,0.4671695037  
 O, -1.0254005179,-4.6808490574,1.0859715754

|                                            |                             |
|--------------------------------------------|-----------------------------|
| Zero-point correction=                     | 0.632643 (Hartree/Particle) |
| Thermal correction to Energy=              | 0.672034                    |
| Thermal correction to Enthalpy=            | 0.672978                    |
| Thermal correction to Gibbs Free Energy=   | 0.557609                    |
| Sum of electronic and zero-point Energies= | -2187.367649                |
| Sum of electronic and thermal Energies=    | -2187.328258                |
| Sum of electronic and thermal Enthalpies=  | -2187.327314                |

Sum of electronic and thermal Free Energies= -2187.442682

J'

C, 0.7789729127,-1.2272890814,1.3354536425  
C, -0.362449437,-1.7227577579,0.4264513213  
H, 0.7796215901,-0.1327666495,1.2827982757  
H, 0.015081651,-2.0080939659,-0.5513150415  
H, -0.9248419371,-2.5366143405,0.8700551769  
O, 2.05111169415,-1.6275483432,0.9073359507  
C, 0.5966607554,-1.6318038282,2.800513754  
H, 1.4225887153,-1.2513744971,3.3949040963  
H, 0.5129672462,-2.7101197702,2.8935230041  
Cl, -0.9294742028,-0.9127890672,3.5388693668  
C, 0.1091068411,5.8169175829,0.923736036  
C, -1.2324181333,5.6278801989,1.2596519366  
C, -1.8255005357,4.3879641922,1.0583465315  
C, -1.0803720211,3.3439141236,0.5114749144  
C, 0.2863281724,3.5098507184,0.1834606609  
C, 0.8584418676,4.7735754859,0.3947961913  
H, 0.5719653739,6.7854208904,1.0724984468  
H, -1.8097792186,6.4376780188,1.6877638825  
H, -2.8527546337,4.2255891774,1.3621208263  
H, 1.8888996221,4.9372849973,0.1038807289  
N, -1.6247309758,2.0561794612,0.295330567  
N, 0.9483054035,2.4306853739,-0.3946845551  
C, -2.8803449016,1.7343464653,0.099177935  
H, -3.5902665964,2.5550140629,0.0762639541  
C, 2.2033565724,2.1835461191,-0.1345944887  
H, 2.7362111117,2.7754801005,0.6178262233  
C, -3.383119317,0.4236138564,-0.1153474954  
C, -4.7689755048,0.2950043968,-0.3958972733  
C, -2.564056439,-0.7458546873,-0.0769796174  
C, -5.3661382302,-0.9232193458,-0.6510117344  
H, -5.3567151953,1.2043977739,-0.4072442058  
C, -3.1621029248,-1.9826186924,-0.3531051931  
C, -4.5165327881,-2.0529344852,-0.6281621498  
H, -2.5660940566,-2.8834910821,-0.3614723543  
H, -4.9316591292,-3.0320007471,-0.8375999574  
C, 2.9380545935,1.1276778698,-0.7525125547  
C, 4.2489098927,0.8397448162,-0.2969414849  
C, 2.3681877708,0.3148805753,-1.7680846852  
C, 4.9926498855,-0.2107497308,-0.7939017  
H, 4.6429327496,1.4640428443,0.495303147  
C, 3.1260904201,-0.7254959049,-2.3030241851  
C, 4.3913403487,-0.9843359332,-1.8134499548



H, 2.6827073366,-1.3510555513,-3.0674277032  
 H, 4.9267152161,-1.8331900621,-2.2189927446  
 O, -1.2787716128,-0.5710553055,0.2180898556  
 O, 1.1166591653,0.506902535,-2.2226279313  
 H, 0.7369272732,1.2628393572,-1.7198584986  
 C, 6.3952299795,-0.5744545257,-0.2829843294  
 C, 6.4388361194,-2.0764772274,0.0849492074  
 H, 7.3884948175,-2.3092457215,0.5771444383  
 H, 5.6076773692,-2.3538658216,0.7350900139  
 H, 6.3646266506,-2.7125206035,-0.7999353802  
 C, 7.4308403987,-0.2817465174,-1.39331748  
 H, 8.4349561334,-0.5647674779,-1.0618410736  
 H, 7.2096632616,-0.8461417559,-2.3029767401  
 H, 7.4438682336,0.7813365505,-1.6526485678  
 C, 6.7772655105,0.238659878,0.9670402476  
 H, 6.8142577906,1.3140656757,0.7666560464  
 H, 6.0765064842,0.0611774499,1.7873613647  
 H, 7.7709756108,-0.0623810002,1.3085767442  
 C, -6.863216772,-1.0912826191,-0.95430757  
 C, -7.499267474,-2.0149500934,0.1104670088  
 H, -7.3966773677,-1.5884285398,1.1117591369  
 H, -8.5651264078,-2.1492464851,-0.0947395269  
 H, -7.0383198433,-3.0053901276,0.1203069707  
 C, -7.6103163187,0.2541202722,-0.9356824485  
 H, -7.5498241026,0.739763345,0.0424277379  
 H, -7.2264181037,0.9453130788,-1.691519243  
 H, -8.6680737419,0.087896424,-1.1529163989  
 C, -7.0354057193,-1.723705521,-2.3549920276  
 H, -6.5633590366,-2.706650168,-2.4206669398  
 H, -8.0974906498,-1.8520069833,-2.5821626848  
 H, -6.5964211962,-1.0885951591,-3.1290380233  
 H, -0.9503262637,1.2881455627,0.242578611  
 C, 2.2411416153,-3.1091577881,0.6509622557  
 O, 3.3891409276,-3.3547274532,0.3294713634  
 O, 1.2025924571,-3.7657288128,0.8030823705

|                                              |                             |
|----------------------------------------------|-----------------------------|
| Zero-point correction=                       | 0.632871 (Hartree/Particle) |
| Thermal correction to Energy=                | 0.672396                    |
| Thermal correction to Enthalpy=              | 0.673340                    |
| Thermal correction to Gibbs Free Energy=     | 0.558575                    |
| Sum of electronic and zero-point Energies=   | -2187.334938                |
| Sum of electronic and thermal Energies=      | -2187.295413                |
| Sum of electronic and thermal Enthalpies=    | -2187.294469                |
| Sum of electronic and thermal Free Energies= | -2187.409234                |

K

C, -1.0083166534,2.1425372914,1.3814828434  
C, -2.2770916606,2.9660914505,1.1211302815  
H, -0.4371207785,1.9358222367,0.47924495  
H, -2.5786037032,2.9328430869,0.0735734217  
H, -2.2037455698,3.9976469376,1.4605504794  
O, -1.5454617395,0.8907902205,1.8616603744  
C, -0.085884548,2.6839469667,2.4653430427  
H, 0.7163809156,1.976312535,2.6517313736  
H, -0.6268477345,2.9124448947,3.3827180183  
Cl, 0.6897720566,4.2302135649,1.9129221852  
C, -0.2105731979,-5.6488403885,0.4476172536  
C, 1.1231235792,-5.5527970423,0.8347777448  
C, 1.785583118,-4.3329459561,0.7363794076  
C, 1.1317607785,-3.1942161456,0.2514655431  
C, -0.2336831295,-3.2831898176,-0.1107578071  
C, -0.8792589801,-4.5223375744,-0.0218032897  
H, -0.731234486,-6.5974797379,0.5075953673  
H, 1.646957223,-6.4212356232,1.2168172744  
H, 2.8116932848,-4.245032781,1.0744478192  
H, -1.9061609874,-4.6038449756,-0.3586219822  
N, 1.7585351457,-1.9392037171,0.1921254996  
N, -0.8667228682,-2.1445526232,-0.6336196263  
C, 2.9809124698,-1.8138527615,-0.1949538761  
H, 3.5513338394,-2.6756685496,-0.5616024031  
C, -2.0913589161,-1.870296456,-0.3399606542  
H, -2.6472051182,-2.4660599409,0.3923276436  
C, 3.6619692092,-0.53539687,-0.1833490999  
C, 4.9956099208,-0.4485999829,-0.6312513855  
C, 3.0083541182,0.6349329013,0.2713112312  
C, 5.7052410821,0.744051838,-0.6412001796  
H, 5.4608419302,-1.3645428763,-0.9754274704  
C, 3.7119921402,1.8432280328,0.2687190692  
C, 5.0222140401,1.8869029024,-0.1759329558  
H, 3.208057509,2.7366607125,0.6176027321  
H, 5.5306027676,2.8443191343,-0.1614430124  
C, -2.7978906752,-0.7580534225,-0.9420858358  
C, -4.1394583889,-0.5143017831,-0.5860270663  
C, -2.1624440068,0.0941047339,-1.8780591247  
C, -4.8792695117,0.5316121431,-1.1214264873  
H, -4.5804678915,-1.1727797169,0.1514372001  
C, -2.903285152,1.1417855612,-2.4389079321  
C, -4.2235074241,1.3449436391,-2.068772559  
H, -2.4185193518,1.7813487332,-3.1671417231  
H, -4.7599328236,2.166573815,-2.5306600477

O, 1.7356712282,0.6182904748,0.7065390179  
 H, 1.4067961964,-0.3198027051,0.6182609212  
 O, -0.8784314891,-0.0572716456,-2.2329951268  
 H, -0.5302004574,-0.8481882055,-1.7431406997  
 C, -6.336328766,0.8221793389,-0.7231394229  
 C, -7.2482238668,0.6743044023,-1.9625990654  
 H, -8.2882922282,0.889139049,-1.6984383179  
 H, -6.9598178646,1.3603789559,-2.7631089929  
 H, -7.2019057674,-0.3427123348,-2.361734834  
 C, -6.8367561482,-0.1396692873,0.3701417932  
 H, -7.8658370523,0.1145832192,0.6377345583  
 H, -6.8350923957,-1.1789873023,0.0289774455  
 H, -6.2292032214,-0.0718569958,1.2761806954  
 C, -6.4435107615,2.2644770451,-0.1745188669  
 H, -5.8008679273,2.3958904665,0.6993038244  
 H, -6.1549653201,3.0066571463,-0.9234442418  
 H, -7.4745175044,2.4802506846,0.1220285908  
 C, 7.1602181964,0.8602820005,-1.126479682  
 C, 8.049621789,1.380516692,0.0265546556  
 H, 8.027595479,0.6931826108,0.8766335458  
 H, 9.0874416113,1.4772034788,-0.306844208  
 H, 7.7227995555,2.3606743636,0.3819517039  
 C, 7.7259246272,-0.4921913673,-1.5960370675  
 H, 7.7318172048,-1.2328444802,-0.7914122686  
 H, 7.1580685117,-0.900734144,-2.4365811707  
 H, 8.758714712,-0.3621539686,-1.9297517754  
 C, 7.2309689639,1.8487630907,-2.3135728837  
 H, 6.878517466,2.8445936665,-2.0347798614  
 H, 8.2622221085,1.9481506385,-2.6660317117  
 H, 6.6177991283,1.4993527755,-3.1486093838  
 C, -2.8503494867,1.0438608341,2.2137982147  
 O, -3.2780113233,2.2915145278,1.9071762984  
 O, -3.51605203,0.1971843857,2.7203190779

|                                              |                             |
|----------------------------------------------|-----------------------------|
| Zero-point correction=                       | 0.632564 (Hartree/Particle) |
| Thermal correction to Energy=                | 0.672163                    |
| Thermal correction to Enthalpy=              | 0.673107                    |
| Thermal correction to Gibbs Free Energy=     | 0.555887                    |
| Sum of electronic and zero-point Energies=   | -2187.394110                |
| Sum of electronic and thermal Energies=      | -2187.354511                |
| Sum of electronic and thermal Enthalpies=    | -2187.353567                |
| Sum of electronic and thermal Free Energies= | -2187.470787                |

**K'**

C, 0.4407331813,-1.4079307546,2.3824447417  
 C, 0.8777466373,-2.4768310033,1.378694638

H, -0.3431399512,-0.777665948,1.9698872684  
H, 0.4913317366,-3.4701841322,1.5991053733  
H, 0.6239956428,-2.1848578454,0.3602027959  
O, 1.6450823843,-0.619409311,2.5283191688  
C, 0.0765642013,-1.9233357341,3.7697928471  
H, -0.0241233002,-1.0957322341,4.4678380649  
H, 0.8156600078,-2.6322944966,4.1415273667  
Cl, -1.5160227133,-2.7875931009,3.7349038008  
C, 0.2634034861,5.5642167696,1.1686262523  
C, -1.0904256217,5.3940252541,1.449724737  
C, -1.7304366574,4.2105052063,1.0972434801  
C, -1.0290746146,3.1944080522,0.444252337  
C, 0.3482074515,3.3526638311,0.1661214819  
C, 0.9736693928,4.5499618599,0.5351778264  
H, 0.7652212352,6.4865572296,1.4361961863  
H, -1.6476647535,6.1748370571,1.9532759347  
H, -2.7709690953,4.063999783,1.3605448457  
H, 2.0167139384,4.6934203833,0.2790240546  
N, -1.6321905677,1.9755401432,0.089100005  
N, 1.001737546,2.3387910351,-0.5452066966  
C, -2.9243934037,1.75529996,-0.1390913696  
H, -3.5837193292,2.6186209211,-0.123809629  
C, 2.2038212698,1.9740704144,-0.2382898318  
H, 2.7009366507,2.3769215643,0.6511169688  
C, -3.4507104475,0.4920779089,-0.4094561932  
C, -4.8483676916,0.3609320832,-0.6869097841  
C, -2.579945211,-0.681955063,-0.4051169733  
C, -5.4341564625,-0.8461079384,-0.9569563671  
H, -5.4390977218,1.2698950278,-0.6758697607  
C, -3.2337416558,-1.9311138534,-0.6916235715  
C, -4.5725158262,-1.9950618303,-0.9512195335  
H, -2.6166407167,-2.8219014455,-0.6999035094  
H, -5.0034581313,-2.9679865296,-1.1637361584  
C, 2.9538136486,1.0215754112,-1.0208771754  
C, 4.2392526964,0.6325342974,-0.5852395313  
C, 2.431807823,0.4747639857,-2.2208544956  
C, 5.0227661672,-0.2715277698,-1.2843212728  
H, 4.5932962774,1.0532079334,0.3468314787  
C, 3.2203032495,-0.4294672169,-2.9407649676  
C, 4.4744558018,-0.7876009521,-2.4777814509  
H, 2.8192086172,-0.8435397809,-3.8579289729  
H, 5.0458887559,-1.5009478871,-3.0610889334  
O, -1.3410628264,-0.603283617,-0.1624316775  
O, 1.2182183368,0.7914342836,-2.69254468

H, 0.8018478353,1.4131449891,-2.048849218  
 C, 6.4027463873,-0.7442696053,-0.7979259808  
 C, 6.8489117404,-0.0080853634,0.4786354294  
 H, 7.8371518071,-0.367366665,0.7786993102  
 H, 6.9273246534,1.0712499811,0.3158506266  
 H, 6.1623559701,-0.190107715,1.3078925332  
 C, 6.3304246478,-2.2565324061,-0.4795966968  
 H, 7.3033582798,-2.617982574,-0.1315382922  
 H, 5.5924963155,-2.4474773944,0.3029188516  
 H, 6.0531599484,-2.8424885012,-1.3600704495  
 C, 7.4603854122,-0.4942442497,-1.896772402  
 H, 7.2295393692,-1.0300130738,-2.8208249307  
 H, 7.5309487842,0.5706815235,-2.13608822  
 H, 8.4445165372,-0.8315689803,-1.5574972862  
 C, -6.9292667645,-1.0263716535,-1.2572152788  
 C, -7.5578526814,-1.9693664092,-0.2043987179  
 H, -7.4627937195,-1.5485242674,0.8002224977  
 H, -8.6218972226,-2.1180512337,-0.4130331441  
 H, -7.0813160111,-2.9525609691,-0.2003142912  
 C, -7.693660037,0.3088637922,-1.2205198816  
 H, -7.6359788929,0.7822469719,-0.2363677761  
 H, -7.3151094065,1.0143101457,-1.9654495014  
 H, -8.7501208661,0.1337571516,-1.4402899028  
 C, -7.10373032,-1.6424886308,-2.665255377  
 H, -6.6123123588,-2.6146651546,-2.748422609  
 H, -8.1652058435,-1.7877096312,-2.8886668231  
 H, -6.6799722027,-0.9880140725,-3.4316893826  
 C, 2.7196671618,-1.3521235364,2.1184440214  
 O, 3.8538473925,-1.0167205731,2.266116166  
 O, 2.3146854803,-2.4981157463,1.5347125052  
 H, -1.0571670228,1.1202577094,-0.0177823077

|                                              |                             |
|----------------------------------------------|-----------------------------|
| Zero-point correction=                       | 0.632781 (Hartree/Particle) |
| Thermal correction to Energy=                | 0.672557                    |
| Thermal correction to Enthalpy=              | 0.673501                    |
| Thermal correction to Gibbs Free Energy=     | 0.554401                    |
| Sum of electronic and zero-point Energies=   | -2187.389105                |
| Sum of electronic and thermal Energies=      | -2187.349330                |
| Sum of electronic and thermal Enthalpies=    | -2187.348386                |
| Sum of electronic and thermal Free Energies= | -2187.467486                |

## L

C, -0.8043206538,2.4187099607,-1.063535273  
 C, -0.0963211915,1.2342758567,-1.7182462109  
 H, -0.0582977471,2.9747462117,-0.4775862826  
 H, 0.7735096951,1.5565258002,-2.2970884481

H, -0.7891576882,0.6745518355,-2.3554168039  
O, -1.855051599,1.9631789396,-0.2348726274  
C, -1.455410722,3.3633913075,-2.0663675352  
H, -2.0011121724,4.1396730872,-1.5371797091  
H, -2.1353987181,2.841016718,-2.7349487802  
Cl, -0.2140976279,4.2053592436,-3.100131487  
C, -3.3079484312,0.2411816293,5.1845704493  
C, -1.9209010451,0.1367225551,5.2154399674  
C, -1.2155410282,-0.1015150715,4.0392579377  
C, -1.8808095915,-0.232316032,2.8139117414  
C, -3.2875060159,-0.1239296567,2.7905090006  
C, -3.9859666721,0.1095891124,3.9743861941  
H, -3.8646297305,0.4319388176,6.0944772048  
H, -1.3842216265,0.2499205971,6.1502302776  
H, -0.132856749,-0.1539085639,4.0500029035  
H, -5.0655910988,0.1977972241,3.9343175899  
N, -1.1882411195,-0.4136720529,1.601619314  
N, -3.9820805237,-0.2249522434,1.5543724246  
C, -0.3735198255,-1.3958879169,1.4954591906  
H, -0.279465834,-2.1148450703,2.3213206689  
C, -4.4835200552,-1.3479525248,1.213192236  
H, -4.3959054472,-2.2116461739,1.8831904428  
C, 0.4230920064,-1.7423558014,0.3157610871  
C, 0.9256447673,-3.0529380089,0.2437280294  
C, 0.664697668,-0.8670936748,-0.764090251  
C, 1.5987236194,-3.5486344328,-0.8707246735  
H, 0.7461616236,-3.6959333659,1.0965867664  
C, 1.317265084,-1.348454145,-1.8999443711  
C, 1.7660165407,-2.6627658658,-1.9459701086  
H, 1.4945713788,-0.6892194036,-2.74023527  
H, 2.2751566586,-2.9943855322,-2.843590927  
C, -5.2264080909,-1.6012913749,-0.026402764  
C, -6.1160375003,-2.6861479539,-0.0276801215  
C, -5.0899783645,-0.8476390436,-1.2089201247  
C, -6.91159219,-3.020131146,-1.1263826802  
H, -6.1867875437,-3.273162622,0.8821369403  
C, -5.860492923,-1.1718589507,-2.3178439764  
C, -6.7646393905,-2.2298105196,-2.2724288904  
H, -5.729532695,-0.5873716693,-3.2203579762  
H, -7.3467426887,-2.440435897,-3.1595386301  
O, 0.2962352005,0.4199832396,-0.6048215181  
H, -1.5352602655,1.1994681748,0.2817378169  
O, -4.1342806885,0.1382912668,-1.3336906326  
H, -4.4925810804,1.1377986789,0.6259417313

C, -7.8840555722,-4.2104301797,-1.0459750493  
 C, -8.9095571855,-3.9613178303,0.0844146362  
 H, -9.6104162186,-4.7987468463,0.1524757909  
 H, -8.4244369002,-3.8551507913,1.0576901949  
 H, -9.4847549673,-3.0508111519,-0.103293825  
 C, -8.6581799249,-4.4156344349,-2.3606730663  
 H, -9.3358668333,-5.266753507,-2.2569645627  
 H, -9.2636743114,-3.542268892,-2.6173511326  
 H, -7.9887209931,-4.6281565534,-3.1986294841  
 C, -7.0922530153,-5.5041923644,-0.7457808805  
 H, -6.3554552176,-5.7017123987,-1.5290178898  
 H, -6.5606222505,-5.445245497,0.2069779489  
 H, -7.7713703809,-6.3604392191,-0.6940234241  
 C, 2.1435396973,-4.9850453556,-0.9584303317  
 C, 3.6746603633,-4.9410040905,-1.1708521254  
 H, 4.169678519,-4.4333955285,-0.3385990276  
 H, 4.0787801587,-5.9555996683,-1.2396669792  
 H, 3.9416636219,-4.4136859489,-2.0896567352  
 C, 1.8595686795,-5.7949667372,0.3195815031  
 H, 2.3246132134,-5.343107799,1.2001443066  
 H, 0.7871409389,-5.8946172863,0.5090647337  
 H, 2.269239265,-6.8027425248,0.212797689  
 C, 1.4822652454,-5.7168382763,-2.1494003544  
 H, 1.6874980202,-5.216528517,-3.098662682  
 H, 1.8616068354,-6.740466846,-2.2247874144  
 H, 0.3970998227,-5.7642284837,-2.0244926601  
 C, -4.567437408,1.4819439142,-1.232860038  
 O, -4.6277732393,2.1751090435,-2.2011184926  
 O, -4.86536626,1.8228236579,-0.0022947198

|                                              |                             |
|----------------------------------------------|-----------------------------|
| Zero-point correction=                       | 0.631960 (Hartree/Particle) |
| Thermal correction to Energy=                | 0.671568                    |
| Thermal correction to Enthalpy=              | 0.672513                    |
| Thermal correction to Gibbs Free Energy=     | 0.556283                    |
| Sum of electronic and zero-point Energies=   | -2187.352582                |
| Sum of electronic and thermal Energies=      | -2187.312973                |
| Sum of electronic and thermal Enthalpies=    | -2187.312029                |
| Sum of electronic and thermal Free Energies= | -2187.428259                |

## M

C, 2.1898248394,2.6807510787,-1.3326099262  
 C, 2.6975533389,1.3074307156,-1.7329695706  
 H, 2.6520375218,3.0010161914,-0.3958682954  
 H, 3.7684260401,1.3485299762,-1.9391632071  
 H, 2.1534810604,0.9412265176,-2.608391948  
 O, 0.7868206673,2.5326552991,-1.159755549

C, 2.4372206067,3.7413254731,-2.4052702847  
H, 2.0195041815,4.6853346416,-2.0698370255  
H, 2.007735529,3.4500642043,-3.3622909173  
Cl, 4.2138169813,4.0305392052,-2.6837691358  
C, -0.9545175206,1.337105239,5.0252873737  
C, 0.3820728154,0.9538714354,5.2024881247  
C, 1.1012338482,0.4691468529,4.1215801952  
C, 0.479197906,0.348051706,2.8766211349  
C, -0.8822876671,0.7008885964,2.6756484462  
C, -1.5716317331,1.2279900527,3.7907838782  
H, -1.5072445727,1.7500035994,5.8617333744  
H, 0.8651428509,1.077428618,6.163560921  
H, 2.1549387572,0.235897438,4.2263844381  
H, -2.5893089909,1.5723194583,3.6573501399  
N, 1.1749794681,-0.1311772904,1.7462972344  
N, -1.3943567065,0.5256326675,1.4198182232  
C, 2.107265582,-1.0475813821,1.7555292807  
H, 2.2624628741,-1.5388425281,2.7109111723  
C, -2.6460283326,0.1949620724,1.2598595206  
H, -3.228494031,-0.0768144431,2.151860569  
C, 2.9115102659,-1.4917184585,0.6568141054  
C, 3.6021230653,-2.7153577532,0.8164410342  
C, 3.0687095737,-0.7659093716,-0.5525249289  
C, 4.3935351652,-3.2668587849,-0.1795405667  
H, 3.4777155916,-3.2322560236,1.759565001  
C, 3.8642486796,-1.3093158066,-1.5630150455  
C, 4.4982110578,-2.5297773976,-1.3735465878  
H, 3.9868071093,-0.787818519,-2.5018336266  
H, 5.0994626723,-2.9146650207,-2.1887658085  
C, -3.3554731821,0.04634247,0.0358485571  
C, -4.6272090164,-0.5823967543,0.1120860635  
C, -2.8213346211,0.4335642291,-1.2576713219  
C, -5.3863107452,-0.9163864829,-0.9902535329  
H, -4.9938570838,-0.8219737692,1.1068760434  
C, -3.6070644228,0.029511219,-2.3859601097  
C, -4.820241618,-0.6007141503,-2.2554789775  
H, -3.2100574046,0.2789099525,-3.3636169803  
H, -5.3620382878,-0.8503636883,-3.1600815001  
O, 2.4472620681,0.4239310504,-0.622336046  
H, 0.8381731991,0.2449930899,0.8535412797  
O, -1.7438963972,1.0892158871,-1.425826265  
H, -1.3517568368,2.2332704239,-0.6530946405  
C, -6.7564327822,-1.6010060114,-0.8269151469  
C, -7.6984799404,-0.6933784625,-0.0021863428



H, -8.6771275599,-1.1680079601,0.1266463141  
 H, -7.2928066676,-0.4901409906,0.9918722071  
 H, -7.8476955244,0.2672719615,-0.502445606  
 C, -7.4336551805,-1.8805913874,-2.1818939251  
 H, -8.4027301585,-2.3600043047,-2.0168163868  
 H, -7.6124059774,-0.960397511,-2.7449255601  
 H, -6.8356167731,-2.5515511436,-2.8048672471  
 C, -6.5842940522,-2.9520534395,-0.0942507437  
 H, -5.9279909358,-3.6190412491,-0.6601391328  
 H, -6.1470715061,-2.8190686191,0.898386904  
 H, -7.5516904484,-3.4500388397,0.0313086973  
 C, 5.1312911334,-4.607746889,-0.032345202  
 C, 6.6513960722,-4.3773844769,-0.1983785372  
 H, 7.0307868342,-3.6948312954,0.5667961808  
 H, 7.1894902717,-5.3250076868,-0.1053553  
 H, 6.8957548164,-3.9538895485,-1.1754293459  
 C, 4.8875820954,-5.2551175847,1.3427265805  
 H, 5.2449934353,-4.6234935468,2.1609884169  
 H, 3.8290367395,-5.473289098,1.5094226226  
 H, 5.4288172727,-6.2024101147,1.4015320808  
 C, 4.6361492572,-5.5854351181,-1.123397769  
 H, 4.8208461381,-5.2021358933,-2.1297697802  
 H, 5.1553964315,-6.5438888128,-1.0346024473  
 H, 3.5629480302,-5.7696488377,-1.0269186227  
 C, 0.1517245724,3.4486364274,-0.3241365712  
 O, 0.7455609747,4.3815411505,0.1606905996  
 O, -1.0948830838,3.1386432758,-0.1771231703

|                                              |                             |
|----------------------------------------------|-----------------------------|
| Zero-point correction=                       | 0.631579 (Hartree/Particle) |
| Thermal correction to Energy=                | 0.670769                    |
| Thermal correction to Enthalpy=              | 0.671714                    |
| Thermal correction to Gibbs Free Energy=     | 0.557231                    |
| Sum of electronic and zero-point Energies=   | -2187.349316                |
| Sum of electronic and thermal Energies=      | -2187.310126                |
| Sum of electronic and thermal Enthalpies=    | -2187.309181                |
| Sum of electronic and thermal Free Energies= | -2187.423664                |

## N

C, -1.6759571357,-3.1168672549,-0.7712178369  
 C, -2.4413983458,-1.9591833159,-1.393432042  
 H, -2.1133455283,-3.3832247261,0.1962917109  
 H, -3.4976571381,-2.2041033414,-1.5176245934  
 H, -1.9977797278,-1.6731631034,-2.3514836571  
 O, -0.3529669126,-2.6614339628,-0.610856062  
 C, -1.6701446904,-4.3566007282,-1.66556541  
 H, -1.1201549903,-5.1440624973,-1.1608089563

H, -1.2368239539,-4.1425586792,-2.6409978667  
Cl, -3.3530900854,-5.0091522014,-1.9684078619  
C, 1.263317797,-0.5751575555,5.0801448578  
C, -0.1012138746,-0.3034252435,5.2104697846  
C, -0.8580633289,-0.0449304052,4.075553491  
C, -0.2413591871,-0.0289302162,2.8244887086  
C, 1.1463268606,-0.2495881146,2.6736702931  
C, 1.8761695312,-0.5623644193,3.8353912539  
H, 1.8475932232,-0.8235384776,5.958783652  
H, -0.5789288359,-0.3435606911,6.1813476337  
H, -1.9317235933,0.0847639629,4.1504462672  
H, 2.9222421868,-0.8238773243,3.7413389721  
N, -1.0027674993,0.1788335316,1.6430827851  
N, 1.6607689259,-0.1731463552,1.3961363638  
C, -1.9693159627,1.0501287686,1.5302248697  
H, -2.0746266368,1.7307375004,2.3699186203  
C, 2.8691689369,0.2300499955,1.206444796  
H, 3.4462867579,0.6317228284,2.0514511643  
C, -2.8802845301,1.2173785589,0.440649202  
C, -3.6705963742,2.3902546094,0.4201541919  
C, -3.0442407027,0.2527540332,-0.5889561346  
C, -4.5785386964,2.6601808312,-0.590911742  
H, -3.5314740064,3.0953038169,1.2300115925  
C, -3.961212967,0.5099321789,-1.6118880014  
C, -4.6947504267,1.6870529765,-1.6041538042  
H, -4.0973845436,-0.202582645,-2.4134664825  
H, -5.3882334647,1.8497815415,-2.4210117201  
C, 3.5583778336,0.2964623075,-0.060296902  
C, 4.7377272585,1.0730429787,-0.0891014653  
C, 3.0873529586,-0.2933595715,-1.2717447215  
C, 5.4470777732,1.3555919451,-1.2475688886  
H, 5.0780535909,1.4800366889,0.8583461703  
C, 3.7888760205,0.0240548667,-2.4498786118  
C, 4.9219742988,0.8180528302,-2.4386563813  
H, 3.4216268129,-0.4072661606,-3.3735717553  
H, 5.4189621888,1.0047090398,-3.3823702146  
O, -2.3041504014,-0.8512026889,-0.4752172575  
H, -0.7495989952,-0.4059025162,0.8382302171  
O, 2.0437683072,-1.0928751536,-1.3798079032  
H, 1.8488730182,-1.7178609471,-0.5805503766  
C, 6.7219865417,2.217265583,-1.1958007658  
C, 7.762597054,1.5506351438,-0.2667074316  
H, 8.6766396452,2.1514799568,-0.2210348129  
H, 7.3844237212,1.4425516283,0.7527309914

H, 8.0269460189,0.5541965327,-0.6305306676  
 C, 7.3640150837,2.3877411078,-2.5852527414  
 H, 8.2665566701,2.9990752648,-2.4998499484  
 H, 7.6556719374,1.4273772263,-3.0191194155  
 H, 6.6912745274,2.8900284666,-3.2858813159  
 C, 6.379281373,3.6235308589,-0.6517495643  
 H, 5.6496302353,4.1224322938,-1.2955406585  
 H, 5.9576488837,3.5758421723,0.3553420563  
 H, 7.2778384042,4.2475228399,-0.6074794899  
 C, -5.4288790752,3.9396475105,-0.6474336554  
 C, -6.9284824654,3.5621295594,-0.6370246659  
 H, -7.191299271,3.0223172571,0.2766473372  
 H, -7.5447872864,4.464203269,-0.687797563  
 H, -7.1972223331,2.9312971616,-1.4876860539  
 C, -5.1557928822,4.8681582886,0.5494102645  
 H, -5.393742908,4.3870709412,1.5024239308  
 H, -4.1143463341,5.200689666,0.5790252488  
 H, -5.7806595443,5.7608908324,0.4699086201  
 C, -5.1015282205,4.7128622838,-1.9461028082  
 H, -5.3167665496,4.1212236821,-2.8391074507  
 H, -5.7008027541,5.6259789274,-2.002754559  
 H, -4.0461248978,4.9959908253,-1.9782772589  
 C, 0.494191378,-3.3887899897,0.3501953259  
 O, -0.0251266106,-4.3230066575,0.9375135859  
 O, 1.6286569129,-2.874296127,0.3800115166

|                                              |                             |
|----------------------------------------------|-----------------------------|
| Zero-point correction=                       | 0.631761 (Hartree/Particle) |
| Thermal correction to Energy=                | 0.671089                    |
| Thermal correction to Enthalpy=              | 0.672033                    |
| Thermal correction to Gibbs Free Energy=     | 0.557082                    |
| Sum of electronic and zero-point Energies=   | -2187.349606                |
| Sum of electronic and thermal Energies=      | -2187.310278                |
| Sum of electronic and thermal Enthalpies=    | -2187.309334                |
| Sum of electronic and thermal Free Energies= | -2187.424285                |

**G**

C, 0.3500476649,-2.5959410442,2.6335929227  
 C, 0.618917358,-1.1708982951,2.4388071614  
 H, -0.4910411652,-3.013188142,2.0879708488  
 H, -0.042861409,-0.6232586496,1.7738152527  
 H, 1.6372690206,-0.8043951606,2.5658879791  
 O, 0.0032276131,-1.6484998344,3.6569210233  
 C, 1.4261470946,-3.5338913805,3.1003960641  
 H, 1.0226349124,-4.3236816576,3.7332011067  
 H, 2.2050416937,-2.9946230479,3.6359064996  
 Cl, 2.2529058504,-4.402736179,1.7131044685

C, 0.2227872316,4.8866508438,1.9290909615  
C, -1.0709151382,4.5378449211,2.316230114  
C, -1.627647054,3.3353912297,1.8981974102  
C, -0.9192473369,2.4290085437,1.0792301924  
C, 0.4141882908,2.7823816666,0.7182700077  
C, 0.9524362994,4.0062705325,1.1357496935  
H, 0.6557959526,5.8338111095,2.2318482828  
H, -1.6494999875,5.2057828127,2.9469676627  
H, -2.6195871201,3.0530199138,2.2310163177  
H, 1.94168447,4.2883582719,0.791052036  
N, -1.4274062951,1.2029138679,0.7039949407  
N, 1.1172390956,1.9117857348,-0.1285871157  
C, -2.6718480115,1.1277946792,0.330169599  
H, -3.2201129178,2.0726665723,0.1706303298  
C, 2.3923209748,1.7722947083,-0.0572926831  
H, 2.9835117486,2.27459163,0.719881418  
C, -3.4557761159,-0.0318793688,0.0501954305  
C, -4.7646491058,0.2080941472,-0.4500672978  
C, -2.9952415358,-1.4073368465,0.2636912506  
C, -5.6654389311,-0.7831380961,-0.7790341202  
H, -5.0446779212,1.2503082509,-0.5728807027  
C, -3.9713822453,-2.4214675858,-0.1080285727  
C, -5.2143083124,-2.1248162726,-0.5921461298  
H, -3.6552555799,-3.4515571868,0.0254898619  
H, -5.8809351245,-2.9478646244,-0.8406844137  
C, 3.1263712596,0.9343230287,-0.9906525899  
C, 4.5229603821,0.8436653138,-0.899648727  
C, 2.4509439294,0.1989779098,-2.002133317  
C, 5.2938576254,0.0684262249,-1.7644784693  
H, 5.0036904965,1.4143363036,-0.1104014941  
C, 3.2158324158,-0.5797769145,-2.8768288516  
C, 4.5978001419,-0.6400135262,-2.7579716357  
H, 2.6953277086,-1.1434901603,-3.6419363867  
H, 5.13784883,-1.2639214138,-3.458728989  
O, -1.8806713279,-1.7230591812,0.7267432394  
O, 1.1252885418,0.2228441859,-2.1468747953  
H, 0.7451898964,0.7867255941,-1.4199308944  
C, 6.824171329,0.0135517358,-1.6046065252  
C, 7.1835302476,-0.5203764298,-0.198611373  
H, 8.2705753158,-0.5700428096,-0.0716159432  
H, 6.7843618503,0.1215312491,0.5901294163  
H, 6.7740067935,-1.5226253516,-0.0483609151  
C, 7.4856145445,-0.9081883345,-2.646114335  
H, 8.5691818531,-0.9167296232,-2.4949209614

|                                              |                             |
|----------------------------------------------|-----------------------------|
| H, 7.1300744367,-1.9384025703,-2.5584747937  |                             |
| H, 7.2961805748,-0.5675540221,-3.6679404423  |                             |
| C, 7.418087709,1.4312132233,-1.7760990567    |                             |
| H, 7.1890807233,1.8306521263,-2.7680746823   |                             |
| H, 7.0151812803,2.1276261884,-1.036904178    |                             |
| H, 8.5070689877,1.4099411258,-1.6582081453   |                             |
| C, -7.0788702037,-0.5177658391,-1.318615511  |                             |
| C, -8.132339251,-1.1360437841,-0.3681304847  |                             |
| H, -8.0648002243,-0.6825978881,0.6247734644  |                             |
| H, -9.147721228,-0.9770223926,-0.7515771505  |                             |
| H, -7.9829963338,-2.2121226443,-0.2504418307 |                             |
| C, -7.3847535966,0.9855382943,-1.4450769956  |                             |
| H, -7.3197865708,1.4907840621,-0.4774942261  |                             |
| H, -6.692858261,1.4801843146,-2.1321646731   |                             |
| H, -8.3997993408,1.1286059929,-1.8306485487  |                             |
| C, -7.2367146442,-1.1526981163,-2.7212864209 |                             |
| H, -7.0606162322,-2.2308832985,-2.6945803765 |                             |
| H, -8.2467498043,-0.9860998395,-3.1152439252 |                             |
| H, -6.5177808186,-0.7180807973,-3.4212292762 |                             |
| Zero-point correction=                       | 0.599993 (Hartree/Particle) |
| Thermal correction to Energy=                | 0.637919                    |
| Thermal correction to Enthalpy=              | 0.638863                    |
| Thermal correction to Gibbs Free Energy=     | 0.523452                    |
| Sum of electronic and zero-point Energies=   | -1998.198184                |
| Sum of electronic and thermal Energies=      | -1998.160259                |
| Sum of electronic and thermal Enthalpies=    | -1998.159314                |
| Sum of electronic and thermal Free Energies= | -1998.274725                |

#### H<sup>-</sup>

C, 0.7452351725,2.9641728216,-1.1671549032  
 C, 1.3297981722,1.5511604182,-1.2580272607  
 H, 1.5799182547,3.6560006441,-1.0175744094  
 H, 1.5184922445,1.2667067067,-2.2988727587  
 H, 0.6413545361,0.8451066488,-0.7933059391  
 O, -0.1327133546,3.1319080876,-0.0790866997  
 C, -0.0144635817,3.3722264233,-2.4354662318  
 H, -0.4672354791,4.3477812912,-2.2818141164  
 H, -0.7720756803,2.6380245684,-2.6971445419  
 Cl, 1.088897798,3.5704219114,-3.9069292512  
 C, -0.9692483102,0.9855765373,5.1997256  
 C, 0.4124804168,0.8460324675,5.3055705185  
 C, 1.168806759,0.6316530933,4.1550261463  
 C, 0.5667320851,0.5591154916,2.892426713  
 C, -0.8456458844,0.6942513688,2.7770866615  
 C, -1.5853541489,0.9107904127,3.9533414185

H, -1.5684836612,1.1752263215,6.0847833397  
H, 0.9031632151,0.9277878687,6.2697149758  
H, 2.24992781,0.5688417958,4.2176008286  
H, -2.655641071,1.0595786294,3.866887504  
N, 1.3156070984,0.4193173938,1.7230523751  
N, -1.4178267001,0.6455859521,1.517114449  
C, 2.2559178629,-0.4339693165,1.6439228355  
H, 2.440454025,-1.1578262847,2.4548967712  
C, -2.513998959,-0.0087753581,1.3328268224  
H, -2.9216142527,-0.6121687597,2.1630158132  
C, 3.1595318909,-0.5738192391,0.4934263788  
C, 3.9840900694,-1.7135252979,0.4616518777  
C, 3.2799779003,0.3722831812,-0.5469500774  
C, 4.8960235309,-1.9720478223,-0.5593418239  
H, 3.8787453813,-2.4136129823,1.2820624918  
C, 4.1984093879,0.1279794564,-1.5716474912  
C, 4.9851959001,-1.0154059607,-1.5822467292  
H, 4.2882045728,0.8713820741,-2.3556077701  
H, 5.6817471773,-1.1569027665,-2.4017266534  
C, -3.2919592946,-0.0845453473,0.1241016035  
C, -4.4433533647,-0.8997081346,0.1662037553  
C, -2.9394519437,0.6152769011,-1.104569912  
C, -5.3014588281,-1.0991031618,-0.9054073775  
H, -4.6512421015,-1.3939513909,1.1136663911  
C, -3.8446403959,0.3787913108,-2.200962091  
C, -4.9564704149,-0.4257128546,-2.1033672125  
H, -3.6091520349,0.8811107284,-3.1341227126  
H, -5.5806774645,-0.5378309467,-2.9838616686  
O, 2.5991884864,1.5486781178,-0.5523155899  
O, -1.9336946045,1.3689283189,-1.2368840619  
H, -0.81426213,2.4273255709,-0.1453964651  
C, -6.5408530194,-2.0016908232,-0.7652654112  
C, -7.4785668134,-1.4469208086,0.3334406354  
H, -8.3627123454,-2.0849828012,0.4544732991  
H, -6.9697659475,-1.3896864007,1.2985955468  
H, -7.8153062775,-0.4382158108,0.078129919  
C, -7.3495617819,-2.0883597835,-2.0731339921  
H, -8.2204983284,-2.7364269423,-1.9297833398  
H, -7.7127877868,-1.1062549989,-2.3883833909  
H, -6.7524815703,-2.5059648129,-2.8885318748  
C, -6.1127031034,-3.4372304771,-0.3792903357  
H, -5.4628850573,-3.8638600572,-1.1485149612  
H, -5.5590291379,-3.4484828234,0.5625617989  
H, -6.9867213723,-4.0901597213,-0.2648784325

|                                              |                             |
|----------------------------------------------|-----------------------------|
| C, 5.7837695834,-3.2286696293,-0.5982104761  |                             |
| C, 7.2729442877,-2.811627946,-0.5928394036   |                             |
| H, 7.5147569146,-2.2486992636,0.3129483214   |                             |
| H, 7.9190171699,-3.6953812528,-0.6298125331  |                             |
| H, 7.5182471925,-2.1814783896,-1.4507892935  |                             |
| C, 5.5437437255,-4.1550153653,0.6078038803   |                             |
| H, 5.7672735378,-3.6553685165,1.554365812    |                             |
| H, 4.5110412783,-4.5115687236,0.645927826    |                             |
| H, 6.1946964975,-5.0312768669,0.533835687    |                             |
| C, 5.4844255753,-4.0315401981,-1.8854698481  |                             |
| H, 5.6776634993,-3.4407640794,-2.7837450277  |                             |
| H, 6.1108909818,-4.9288494107,-1.9325474053  |                             |
| H, 4.4369632103,-4.343315987,-1.9124455224   |                             |
| Zero-point correction=                       | 0.603027 (Hartree/Particle) |
| Thermal correction to Energy=                | 0.639733                    |
| Thermal correction to Enthalpy=              | 0.640677                    |
| Thermal correction to Gibbs Free Energy=     | 0.532508                    |
| Sum of electronic and zero-point Energies=   | -1998.223276                |
| Sum of electronic and thermal Energies=      | -1998.186569                |
| Sum of electronic and thermal Enthalpies=    | -1998.185625                |
| Sum of electronic and thermal Free Energies= | -1998.293794                |

**F**  
 C, -0.6444033104,-2.2683904729,-1.8632256225  
 C, -1.2750002659,-0.8946604002,-1.6116704897  
 H, -1.4477610474,-3.009743953,-1.8536830295  
 H, -1.4528042624,-0.3636775879,-2.5528031622  
 H, -0.6208838443,-0.3093841423,-0.9658805383  
 O, 0.2737608247,-2.6451719279,-0.8599086765  
 C, 0.0938706357,-2.3463786943,-3.2049650655  
 H, 0.5763426107,-3.3158846197,-3.2933404709  
 H, 0.825187231,-1.5478959603,-3.2991923708  
 Cl, -1.0405191942,-2.2275607542,-4.656368868  
 C, 1.0132945878,-1.7241020082,4.8023213358  
 C, -0.3720519398,-1.6571570469,4.9305468523  
 C, -1.1390248181,-1.221692918,3.8518380016  
 C, -0.5429599054,-0.854512701,2.6385287367  
 C, 0.8725216105,-0.9123655109,2.5031389534  
 C, 1.6228606023,-1.3572006293,3.6057723451  
 H, 1.6211055491,-2.084435008,5.6262506236  
 H, -0.8565207656,-1.9646281043,5.8512435136  
 H, -2.2214777287,-1.2090355399,3.9222814757  
 H, 2.6966851221,-1.4500906827,3.4920549011  
 N, -1.3005986947,-0.4874915072,1.5240818625  
 N, 1.4388775219,-0.5649112572,1.2879275151

C, -2.2626116517,0.338401971,1.6323193219  
H, -2.4595315551,0.8618648182,2.5821920647  
C, 2.5051368273,0.1592322513,1.2586122216  
H, 2.8905870151,0.5814867631,2.2032279243  
C, -3.1776789735,0.7039220965,0.542382659  
C, -4.0379398833,1.793842108,0.7699152017  
C, -3.2780872217,0.0135635182,-0.6846229638  
C, -4.9687547843,2.2445463827,-0.1635179457  
H, -3.9466124741,2.2941425127,1.7267644985  
C, -4.2165868325,0.4492442031,-1.6238818876  
C, -5.0397997779,1.5386370374,-1.3742987451  
H, -4.290172519,-0.101948024,-2.5544387873  
H, -5.7496839663,1.8364349182,-2.1385685229  
C, 3.2736569253,0.5338722874,0.099477504  
C, 4.3844776058,1.3745099227,0.3255210936  
C, 2.9488165746,0.1072729669,-1.2541498561  
C, 5.2244918758,1.848136109,-0.6719820296  
H, 4.5740823224,1.6578316959,1.3593352819  
C, 3.8331732783,0.6225309195,-2.2669711669  
C, 4.9051888921,1.4397466385,-1.989917553  
H, 3.6162601336,0.3271164194,-3.2888066925  
H, 5.5171281428,1.7735064417,-2.8214166931  
O, -2.5569752395,-1.1048385243,-0.963155883  
O, 1.9787334971,-0.6470650954,-1.557220711  
H, 0.943388491,-1.924884674,-0.778886511  
C, 6.4140170635,2.7637593056,-0.3315534078  
C, 7.3803589235,2.041251847,0.6365585991  
H, 8.2316716076,2.683509702,0.8936838695  
H, 6.8778763366,1.7615006974,1.5654986274  
H, 7.7661164519,1.1249527092,0.1810253307  
C, 7.2172810856,3.1655897868,-1.5832814681  
H, 8.0506985191,3.8156846714,-1.2973276542  
H, 7.6344061841,2.2920618342,-2.09220243  
H, 6.5993673213,3.7121759507,-2.3011691788  
C, 5.9080126509,4.0619113463,0.3409910421  
H, 5.2302853064,4.6012084384,-0.3267116007  
H, 5.3611389229,3.8458276619,1.2617776998  
H, 6.7441687129,4.7259767504,0.5927400491  
C, -5.8940538376,3.4490427605,0.0850655691  
C, -7.3702947693,2.9964741918,0.0007182442  
H, -7.5860552007,2.2344711091,0.7547032259  
H, -8.0415045206,3.8454304757,0.1697146414  
H, -7.6075643634,2.5724255051,-0.9777092549  
C, -5.6688197722,4.0852562456,1.4687989786



H, -5.8691357382,3.3774736683,2.2777877503  
H, -4.6459876706,4.4537321957,1.5833104409  
H, -6.3446560448,4.9358939588,1.597132858  
C, -5.6310654532,4.5314757875,-0.987591067  
H, -5.8123672186,4.1528169448,-1.9960897306  
H, -6.2869799489,5.3944924983,-0.8302166398  
H, -4.5946787852,4.8766454187,-0.9438980985  
C, -0.0147819587,-4.7793615302,0.6566952199  
O, 0.9734969835,-4.5997855743,1.2371013329  
O, -1.012676009,-5.0566495941,0.1282404122

|                                              |                             |
|----------------------------------------------|-----------------------------|
| Zero-point correction=                       | 0.615415 (Hartree/Particle) |
| Thermal correction to Energy=                | 0.656452                    |
| Thermal correction to Enthalpy=              | 0.657396                    |
| Thermal correction to Gibbs Free Energy=     | 0.535622                    |
| Sum of electronic and zero-point Energies=   | -2186.859931                |
| Sum of electronic and thermal Energies=      | -2186.818894                |
| Sum of electronic and thermal Enthalpies=    | -2186.817950                |
| Sum of electronic and thermal Free Energies= | -2186.939724                |

#### J

C, -1.5468800046,-2.9373175729,-1.9689956991  
C, -2.383408554,-1.6764869259,-2.117161379  
H, -1.8914691055,-3.5166367629,-1.1088575248  
H, -3.4050320705,-1.9315837831,-2.4184752013  
H, -1.9307808953,-1.0166717571,-2.8664957832  
O, -0.2054473233,-2.5384521787,-1.7930476158  
C, -1.5808251951,-3.8261876691,-3.2129863007  
H, -0.9584186869,-4.6944192096,-3.0236153317  
H, -1.2492494354,-3.2882489643,-4.0995538551  
Cl, -3.2567100601,-4.4825776648,-3.6134492629  
C, 0.9844048176,-2.1979648742,4.7788465044  
C, -0.3914080563,-2.0237145559,4.9012955522  
C, -1.110264428,-1.4563598694,3.8518746183  
C, -0.4737833216,-1.0571298948,2.6686598887  
C, 0.9355407541,-1.1992802542,2.5544217621  
C, 1.6356929312,-1.7881415775,3.6181839254  
H, 1.5493838318,-2.6730731823,5.5740080082  
H, -0.9104909999,-2.354763648,5.7946053019  
H, -2.189629311,-1.3695787873,3.9124141333  
H, 2.6989088295,-1.9629355645,3.5031038803  
N, -1.1934416352,-0.6047955044,1.5664410463  
N, 1.5509002681,-0.7703577662,1.380449388  
C, -2.0649528835,0.3155565762,1.6671850742  
H, -2.2066268032,0.8642202842,2.6136640427  
C, 2.6808145273,-0.1771442916,1.4468611144

H, 3.1191719603,0.065821165,2.4295742924  
C, -2.9257676725,0.7829540684,0.5731545969  
C, -3.6590927437,1.9580609862,0.7918116246  
C, -3.0444891913,0.131666406,-0.6816065145  
C, -4.4793730843,2.5469011645,-0.1706497582  
H, -3.5516170433,2.4199853347,1.7661559277  
C, -3.8518094672,0.7199265298,-1.6649471881  
C, -4.546038463,1.8965941388,-1.4090635917  
H, -3.9447448067,0.253126659,-2.6359669865  
H, -5.1579890261,2.3062798232,-2.2058145655  
C, 3.4793185218,0.309914762,0.3273249555  
C, 4.600435028,1.0890410462,0.6710532979  
C, 3.1638259404,0.1314544489,-1.0556363633  
C, 5.4171093799,1.7401269255,-0.2487615035  
H, 4.811515087,1.1886175356,1.732345632  
C, 3.9718469551,0.8265572612,-1.9819948622  
C, 5.0551522,1.5982102631,-1.5990901569  
H, 3.7166522578,0.7087469349,-3.0290574266  
H, 5.6331035054,2.0855471459,-2.3754992564  
O, -2.3915110192,-1.0258895222,-0.8452809136  
O, 2.1763121602,-0.582980805,-1.544944575  
H, 1.9258853256,-1.4929743347,-1.0837426388  
C, 6.6259752403,2.5658359247,0.2262174297  
C, 7.6035006528,1.6598015928,1.0104368467  
H, 8.470520121,2.2331955019,1.3584407314  
H, 7.1229178454,1.2143561779,1.8845486986  
H, 7.963327513,0.8427393474,0.3791044404  
C, 7.400068821,3.1922073124,-0.9488206647  
H, 8.2514855954,3.7647755368,-0.5678147782  
H, 7.789270987,2.4295004691,-1.6289942504  
H, 6.7724972608,3.8755025989,-1.5277312101  
C, 6.1508137961,3.713842095,1.1471408701  
H, 5.4673408184,4.3794068742,0.612589999  
H, 5.6226208825,3.3324328342,2.0241377627  
H, 7.0025737883,4.3071588387,1.4994720509  
C, -5.2783156041,3.8390164348,0.0746069432  
C, -6.7874489268,3.5582269423,-0.1119354274  
H, -7.1296967389,2.797345446,0.5949101192  
H, -7.3726204145,4.4690446047,0.0555713028  
H, -7.0090252768,3.1988821533,-1.1196171677  
C, -5.0699205564,4.3932607302,1.4958871245  
H, -5.392936399,3.6805516524,2.2597242719  
H, -4.0223771697,4.6432224852,1.683948594  
H, -5.6575799393,5.3069932146,1.6251737388

|                                              |                             |
|----------------------------------------------|-----------------------------|
| C, -4.8342936207,4.9252829841,-0.9324641726  |                             |
| H, -4.9985917334,4.6091620205,-1.9653063172  |                             |
| H, -5.3966801455,5.8515984037,-0.7722265375  |                             |
| H, -3.7698476075,5.1470062165,-0.8185565829  |                             |
| C, 0.6475729146,-3.4476772494,-1.0527699967  |                             |
| O, 0.2073085286,-4.5688758449,-0.8269294657  |                             |
| O, 1.7437613732,-2.9113738364,-0.7818536662  |                             |
| Zero-point correction=                       | 0.616360 (Hartree/Particle) |
| Thermal correction to Energy=                | 0.655546                    |
| Thermal correction to Enthalpy=              | 0.656490                    |
| Thermal correction to Gibbs Free Energy=     | 0.542337                    |
| Sum of electronic and zero-point Energies=   | -2186.848392                |
| Sum of electronic and thermal Energies=      | -2186.809206                |
| Sum of electronic and thermal Enthalpies=    | -2186.808262                |
| Sum of electronic and thermal Free Energies= | -2186.922415                |

## 2J

C, -0.4983251373,-2.074517757,-1.7894478655  
 C, -1.6001384873,-1.0148560264,-1.9656379377  
 H, -0.1556553887,-2.0041985011,-0.7548549121  
 H, -2.5386463841,-1.4662913058,-2.2922522803  
 H, -1.288595471,-0.2718511288,-2.6952473789  
 O, 0.6470033959,-1.8527324126,-2.5861184405  
 C, -0.9760131818,-3.5026754288,-2.0637738698  
 H, -0.1525198698,-4.1970795431,-1.9196685801  
 H, -1.3848577389,-3.5818319187,-3.0657687966  
 Cl, -2.2992335138,-4.0564731125,-0.9003306592  
 C, 1.00974716,0.1990252771,5.6026012403  
 C, -0.3846035505,0.1855703678,5.5976112739  
 C, -1.0752039749,0.2829857013,4.393905118  
 C, -0.3920900897,0.4010895997,3.1741834231  
 C, 1.0307578906,0.4102216836,3.1789127637  
 C, 1.7057968994,0.3036732804,4.4033818566  
 H, 1.5542262574,0.1054014132,6.5360329988  
 H, -0.9334541948,0.0787787353,6.5271479643  
 H, -2.1576220305,0.2253335203,4.3805767054  
 H, 2.7894711945,0.2794828276,4.4146023385  
 N, -1.0484168629,0.4361876812,1.9428906483  
 N, 1.6401081111,0.4849189084,1.9290866685  
 C, -2.065202403,1.1943252856,1.7885570851  
 H, -2.3742061704,1.8673815428,2.6048306326  
 C, 2.8944990779,0.6864367131,1.7115496637  
 H, 3.6077272384,0.8980590832,2.520308101  
 C, -2.8936240678,1.3368547974,0.5935473729  
 C, -3.8964204436,2.3224554524,0.6697390131

C, -2.7434544241,0.6064032242,-0.6184244384  
C, -4.7476421452,2.6463928348,-0.3806252945  
H, -3.979702796,2.8512291345,1.6119055565  
C, -3.5866275369,0.9438063737,-1.6936947115  
C, -4.5541806406,1.9287100732,-1.5699464439  
H, -3.4820432718,0.4299488733,-2.6376382471  
H, -5.1730417464,2.1376421721,-2.4363387655  
C, 3.4395975655,0.6182874393,0.3754694131  
C, 4.8294198473,0.7399825148,0.1787703547  
C, 2.5987034719,0.3756319197,-0.7503499284  
C, 5.4238831142,0.6031159395,-1.0682168531  
H, 5.4392615304,0.9334656033,1.0572945591  
C, 3.1901751145,0.1962570628,-2.0094736408  
C, 4.5631895678,0.3115115489,-2.1490486335  
H, 2.5622350906,-0.0824243017,-2.8524110294  
H, 4.9719228241,0.1526376868,-3.1389286427  
O, -1.8211009245,-0.3552650327,-0.6848547859  
O, 1.2731548676,0.3153116151,-0.6481807322  
H, 1.0248031256,0.3542924374,0.3114577965  
C, 6.9505185928,0.7409534552,-1.2223877234  
C, 7.661408087,-0.3419306329,-0.3775706579  
H, 8.7496003406,-0.2581487917,-0.477228546  
H, 7.4140554497,-0.2510691746,0.682979464  
H, 7.3636605175,-1.3422674851,-0.703009568  
C, 7.4055391876,0.5775150009,-2.6844210951  
H, 8.4918677577,0.694629457,-2.7477880463  
H, 7.1538491267,-0.4100163215,-3.0793293399  
H, 6.9496873933,1.328133487,-3.3354010038  
C, 7.4007186414,2.1385748379,-0.7370420233  
H, 6.9227323351,2.9251446147,-1.3273783726  
H, 7.1389936471,2.3049783563,0.3108541442  
H, 8.4866368031,2.2494890675,-0.8332657752  
C, -5.8379977808,3.727150179,-0.2909601306  
C, -7.2207359718,3.093547869,-0.5705517321  
H, -7.4441172159,2.3125199599,0.161350269  
H, -8.0096817017,3.8515599561,-0.5153768586  
H, -7.2627125806,2.6396012467,-1.5633216779  
C, -5.8900731969,4.3903976393,1.0976444441  
H, -6.1088430737,3.6643896574,1.8856559439  
H, -4.9486410543,4.8889077342,1.3441276394  
H, -6.6798421697,5.1473284684,1.1155050038  
C, -5.5639034317,4.831107657,-1.3385692526  
H, -5.5482371433,4.4285642205,-2.3539927428  
H, -6.3402871072,5.6027510649,-1.2959086685

|                                              |                             |
|----------------------------------------------|-----------------------------|
| H, -4.5969282777,5.3076734189,-1.1561027387  |                             |
| C, 0.4548525868,-1.6109943116,-4.034949297   |                             |
| O, 1.4983119814,-1.235779182,-4.5617233931   |                             |
| O, -0.6966112909,-1.8117501029,-4.4525072649 |                             |
| Zero-point correction=                       | 0.618362 (Hartree/Particle) |
| Thermal correction to Energy=                | 0.657735                    |
| Thermal correction to Enthalpy=              | 0.658679                    |
| Thermal correction to Gibbs Free Energy=     | 0.543668                    |
| Sum of electronic and zero-point Energies=   | -2186.844013                |
| Sum of electronic and thermal Energies=      | -2186.804640                |
| Sum of electronic and thermal Enthalpies=    | -2186.803696                |
| Sum of electronic and thermal Free Energies= | -2186.918707                |

## 2K

C, 0.4495496841,2.0475428538,2.5342252191  
 C, 0.3399577772,3.3089963733,1.6819463345  
 H, 0.9126690794,1.2338768968,1.9768205073  
 H, 1.0893259383,4.0634003196,1.9135904091  
 H, 0.3665378946,3.06195961,0.6241298867  
 O, -0.9476395939,1.7340924454,2.7877222723  
 C, 1.0639365806,2.2371950357,3.9182628895  
 H, 0.9553690216,1.3254018905,4.5007061568  
 H, 0.6007083869,3.0709238813,4.4462574978  
 Cl, 2.8427945602,2.6008925139,3.8477487248  
 C, -0.5643749418,-3.8512876994,3.4724168288  
 C, 0.8269839707,-3.7524147197,3.4603375547  
 C, 1.4563977632,-2.8304216868,2.6320022985  
 C, 0.7232635465,-1.9796477929,1.779774575  
 C, -0.696571428,-2.1050152602,1.7827556576  
 C, -1.3131271654,-3.0276974508,2.6373969683  
 H, -1.062923382,-4.5428552521,4.1428692982  
 H, 1.4230363294,-4.3775577627,4.1178966469  
 H, 2.5344990269,-2.7209117576,2.6580655019  
 H, -2.3964653482,-3.0677049484,2.6721759146  
 N, 1.314683059,-1.0079344662,0.9983098592  
 N, -1.4205543031,-1.256858756,0.9376714623  
 C, 2.3616521606,-1.2998481582,0.2901604149  
 H, 2.6697780987,-2.3581045232,0.2331524388  
 C, -2.5334435947,-1.6004644355,0.3972457185  
 H, -2.9451815069,-2.6119386057,0.5153608842  
 C, 3.1820405912,-0.4231326288,-0.4883979812  
 C, 4.2201099838,-1.0364754997,-1.2373497341  
 C, 2.9948844651,1.0252502382,-0.5455197102  
 C, 5.0954979921,-0.3506075432,-2.0557742319  
 H, 4.3061658306,-2.1151073488,-1.1425180961

C, 3.9249170456,1.7080146784,-1.4267951695  
C, 4.9061571688,1.0605410392,-2.1271371446  
H, 3.8055362676,2.784804563,-1.4977589601  
H, 5.5639884085,1.6531402785,-2.7591713786  
C, -3.3061446938,-0.6767453534,-0.4147487073  
C, -4.5375725771,-1.0863305094,-0.9593756584  
C, -2.8417449315,0.6387520932,-0.6659738858  
C, -5.3351699462,-0.251504976,-1.7322220572  
H, -4.853160905,-2.101160552,-0.7456768562  
C, -3.6414964956,1.4902018333,-1.4416518432  
C, -4.849678816,1.0532727648,-1.9544165545  
H, -3.284320023,2.4969331884,-1.6221794366  
H, -5.4334843888,1.750198698,-2.5465352574  
O, 2.1252551701,1.6573014163,0.0969922097  
O, -1.67557687,1.0960847725,-0.207719335  
H, -1.2294547734,0.3658329451,0.3032626481  
C, -6.6831672251,-0.6845494258,-2.333923972  
C, -7.046150128,-2.1354741174,-1.9693267448  
H, -8.0090518036,-2.3985150453,-2.4175298944  
H, -6.3022351213,-2.8447897038,-2.3424109202  
H, -7.13507323,-2.2708546034,-0.8879736292  
C, -7.8085962258,0.2365271023,-1.8081289443  
H, -8.7748171887,-0.0533334916,-2.2355222901  
H, -7.8824563913,0.1744469982,-0.7190804853  
H, -7.6283222796,1.2822315431,-2.0679206052  
C, -6.6201854625,-0.5812525784,-3.8757042058  
H, -6.4034226966,0.4384718765,-4.2024433558  
H, -5.8367678886,-1.2311830613,-4.2749288465  
H, -7.5751626459,-0.8807623462,-4.3214041825  
C, 6.220511813,-1.0164659815,-2.8622215202  
C, 7.5906696619,-0.4377502884,-2.4345393852  
H, 7.7737560293,-0.6312033246,-1.3739189358  
H, 8.4055404448,-0.8895331623,-3.0133063033  
H, 7.6322010925,0.6437223185,-2.5847679554  
C, 6.2676385235,-2.5409840547,-2.6528510847  
H, 6.4381273892,-2.7964677663,-1.6033927976  
H, 5.3374060505,-3.0196946126,-2.9708417112  
H, 7.0846006009,-2.9733193006,-3.2400667838  
C, 6.0154551305,-0.7519958142,-4.3733582127  
H, 6.00198633,0.3181881628,-4.5940309444  
H, 6.8198570298,-1.2070481588,-4.9641780445  
H, 5.0626577972,-1.1701964627,-4.7097286612  
C, -1.7096304845,2.8375026934,2.5694799071  
O, -2.8715147334,2.9179762657,2.8344590397

|                                              |                             |
|----------------------------------------------|-----------------------------|
| O, -0.9672203753,3.8316062366,2.0379917197   |                             |
| Zero-point correction=                       | 0.617223 (Hartree/Particle) |
| Thermal correction to Energy=                | 0.657073                    |
| Thermal correction to Enthalpy=              | 0.658018                    |
| Thermal correction to Gibbs Free Energy=     | 0.539134                    |
| Sum of electronic and zero-point Energies=   | -2186.855652                |
| Sum of electronic and thermal Energies=      | -2186.815801                |
| Sum of electronic and thermal Enthalpies=    | -2186.814857                |
| Sum of electronic and thermal Free Energies= | -2186.933741                |

**TSA-C**

C, -0.7829482204,5.091090567,0.1083599538  
C, 0.5354244682,5.1302699886,-0.3383905015  
C, 1.2486279357,3.946293828,-0.4962475129  
C, 0.6648251372,2.7070124003,-0.2058753814  
C, -0.6911811054,2.664811361,0.2029510753  
C, -1.3900545115,3.8664137668,0.3707406775  
H, -1.3408958989,6.0097888742,0.2482438197  
H, 1.0076055402,6.078332989,-0.5684838449  
H, 2.2620461867,3.9780610573,-0.8792546658  
H, -2.4077702695,3.8306093757,0.741862697  
N, 1.3264973346,1.4813834668,-0.3670252433  
N, -1.2680139492,1.4179508042,0.4993872634  
C, 2.5993358923,1.3527173355,-0.2185805015  
H, 3.2355861313,2.1990216166,0.0662903312  
C, -2.4251251715,1.1392810343,0.0291671912  
H, -2.9344154801,1.8442345,-0.643043539  
C, 3.2564516657,0.0731497535,-0.3860074907  
C, 4.6591137166,-0.0136200973,-0.2809397123  
C, 2.5050906045,-1.1050578156,-0.6208054117  
C, 5.3470278249,-1.2119249858,-0.4103778798  
H, 5.1967875899,0.9079487251,-0.0930296121  
C, 3.1871874217,-2.3204334458,-0.744939927  
C, 4.567037191,-2.3635565278,-0.6450250451  
H, 2.6082371126,-3.2188307852,-0.9221934634  
H, 5.0544723995,-3.3262164143,-0.7516177789  
C, -3.1714598918,-0.0878275955,0.286662517  
C, -4.4363116001,-0.1937829208,-0.3155924989  
C, -2.7094425446,-1.1666016924,1.0826760171  
C, -5.2707613284,-1.3021028089,-0.1705665283  
H, -4.7640389108,0.6431080183,-0.9237553342  
C, -3.5413999063,-2.2769577039,1.2399313584  
C, -4.7871296549,-2.3472944069,0.6274019819  
H, -3.1787567038,-3.091209854,1.8558269794  
H, -5.3833370901,-3.236793438,0.7832558165

O, 1.1662531085,-1.0948746726,-0.714498249  
 H, 0.8791616124,-0.1421019639,-0.6369188322  
 O, -1.5168030704,-1.1888447634,1.7091509395  
 H, -0.2405579355,-0.9368309316,1.5153677347  
 C, -6.6405282041,-1.3390291332,-0.8719304454  
 C, -6.4387890594,-1.2402709407,-2.401841075  
 H, -7.4050408589,-1.2632868389,-2.9151635415  
 H, -5.9335859495,-0.3140496564,-2.6855792787  
 H, -5.8370331858,-2.0750801456,-2.7709639783  
 C, -7.4113432159,-2.637680684,-0.5726628906  
 H, -8.3753395352,-2.6179005944,-1.0877463447  
 H, -6.8703599979,-3.5217840929,-0.9207346769  
 H, -7.6109510002,-2.7554483415,0.495945338  
 C, -7.5012761043,-0.1478154123,-0.391041673  
 H, -7.6633052851,-0.1944504303,0.689189926  
 H, -7.0299931347,0.8116334482,-0.6169350405  
 H, -8.4785719341,-0.1618995107,-0.883238748  
 C, 6.8777486793,-1.3254344535,-0.3088758971  
 C, 7.4420096874,-1.8936930171,-1.6319551603  
 H, 7.1976239777,-1.2391927652,-2.4730397072  
 H, 8.5313393556,-1.9830780328,-1.5748357056  
 H, 7.0386091503,-2.8847828121,-1.8525188938  
 C, 7.5459918658,0.036623731,-0.0485749157  
 H, 7.3475498431,0.7477674645,-0.8553200307  
 H, 7.2095663892,0.4807662553,0.8923327293  
 H, 8.6296184855,-0.0922191722,0.0172326305  
 C, 7.2503898461,-2.2738408853,0.854433886  
 H, 6.8408364751,-3.2761346381,0.7085753329  
 H, 8.3377653468,-2.3676000071,0.9361882393  
 H, 6.8687002517,-1.8925448623,1.8053715728  
 C, -0.6561893504,0.0362631032,2.8225345638  
 O, -1.2454422066,0.6262558222,3.6254665524  
 O, 0.3965380379,-0.3205240366,2.2764258326

|                                              |                             |
|----------------------------------------------|-----------------------------|
| Zero-point correction=                       | 0.545186 (Hartree/Particle) |
| Thermal correction to Energy=                | 0.578755                    |
| Thermal correction to Enthalpy=              | 0.579699                    |
| Thermal correction to Gibbs Free Energy=     | 0.478163                    |
| Sum of electronic and zero-point Energies=   | -1534.576886                |
| Sum of electronic and thermal Energies=      | -1534.543317                |
| Sum of electronic and thermal Enthalpies=    | -1534.542373                |
| Sum of electronic and thermal Free Energies= | -1534.643909                |

#### TSB-C

C, -0.7086606064,5.1408816889,-0.0090915881  
 C, 0.63741293,5.1900302612,-0.3635506221



C, 1.3525809235,4.0128573885,-0.5543860618  
C, 0.7415334069,2.7608159598,-0.3982417934  
C, -0.630471992,2.7222183849,-0.066285763  
C, -1.3355884851,3.908773437,0.1436537613  
H, -1.2664582779,6.0541199179,0.1592085796  
H, 1.1320601892,6.1455259741,-0.4939094358  
H, 2.3896418138,4.0508167481,-0.8660196763  
H, -2.3693154306,3.8642374097,0.4658829643  
N, 1.4117699937,1.5573858537,-0.6442922935  
N, -1.2376203196,1.4515324222,0.1185663428  
C, 2.6102756434,1.3709302195,-0.202585419  
H, 3.0932069673,2.1183084521,0.4377783071  
C, -2.4538338206,1.2062309839,-0.2569340375  
H, -2.9927173138,2.0143171942,-0.7521344913  
C, 3.3792207523,0.1860078758,-0.4974931539  
C, 4.6800318427,0.0580176143,0.0353312841  
C, 2.8562570958,-0.852542119,-1.3071228192  
C, 5.4832133637,-1.0447854183,-0.2074986159  
H, 5.038197596,0.8692473183,0.6576245068  
C, 3.6612744995,-1.9698611065,-1.5625231195  
C, 4.9328744399,-2.0548755531,-1.0266005813  
H, 3.2562997226,-2.7623610796,-2.1798848801  
H, 5.5181098367,-2.9404882704,-1.2477566649  
C, -3.1892828076,-0.0210021569,-0.0819183757  
C, -4.5942994852,0.0422857072,-0.2395726698  
C, -2.5740390018,-1.2709276468,0.1883097323  
C, -5.4123446868,-1.0641577305,-0.071491447  
H, -5.0273603032,1.0054587092,-0.4813667154  
C, -3.3961786711,-2.391997218,0.3510690886  
C, -4.771488057,-2.2834596124,0.2357201296  
H, -2.918534796,-3.3398852073,0.5637915727  
H, -5.3676802269,-3.1781826349,0.3755724909  
O, 1.6300939691,-0.8093730241,-1.838323231  
H, 1.1932608576,0.0181596617,-1.5253448906  
O, -1.2413334298,-1.38691889,0.2033251262  
H, -0.6325377841,0.6752314996,0.7816264476  
C, -6.943360237,-1.0133735544,-0.2066970032  
C, -7.3947843837,-1.9851004248,-1.3218233936  
H, -8.4837686382,-1.9644746157,-1.4247024934  
H, -6.9566965528,-1.7059583514,-2.283860307  
H, -7.1019495575,-3.0155316083,-1.1081745975  
C, -7.5892525881,-1.4333489291,1.1340865301  
H, -8.6802237075,-1.4091486295,1.0543428475  
H, -7.3002365104,-2.4458783155,1.4252376793

H, -7.2914988809,-0.7568498967,1.9396891302  
 C, -7.4499728201,0.395455499,-0.5645421464  
 H, -7.1939953811,1.1282688128,0.2059198968  
 H, -7.0473663187,0.7432060189,-1.5201956226  
 H, -8.5391927243,0.3815082748,-0.6538599226  
 C, 6.9006258744,-1.2043204345,0.367080885  
 C, 7.9170020141,-1.3245991663,-0.7920103894  
 H, 7.9010557413,-0.4288213128,-1.4189201621  
 H, 8.9311160429,-1.4481045332,-0.399480658  
 H, 7.7017164384,-2.1835508274,-1.4319610095  
 C, 7.3096436568,-0.0059201086,1.2426445169  
 H, 7.3176012369,0.9288877841,0.6748894738  
 H, 6.6421372604,0.117586038,2.0999097601  
 H, 8.3193094012,-0.1625977547,1.6313927707  
 C, 6.9639494479,-2.4804672505,1.2381271205  
 H, 6.7265538627,-3.37770034,0.6617387023  
 H, 7.9684945104,-2.6085889363,1.6530502767  
 H, 6.2560030688,-2.421192376,2.0689302912  
 C, -0.5283922127,-1.2741542486,1.5703412173  
 O, -0.0786926544,-0.1067027111,1.6801190603  
 O, -0.5135591272,-2.2643613658,2.2332952286

|                                              |                             |
|----------------------------------------------|-----------------------------|
| Zero-point correction=                       | 0.547231 (Hartree/Particle) |
| Thermal correction to Energy=                | 0.580178                    |
| Thermal correction to Enthalpy=              | 0.581123                    |
| Thermal correction to Gibbs Free Energy=     | 0.480600                    |
| Sum of electronic and zero-point Energies=   | -1534.621349                |
| Sum of electronic and thermal Energies=      | -1534.588401                |
| Sum of electronic and thermal Enthalpies=    | -1534.587457                |
| Sum of electronic and thermal Free Energies= | -1534.687980                |

**TSD-E**

C, 1.00789342,-4.8754677856,-2.4332388625  
 C, -0.4510304638,-4.7372706763,-2.3979752952  
 H, 1.4782697061,-4.6911794586,-1.4600449445  
 H, -1.006027108,-4.5231021553,-1.4991984144  
 H, -1.007265443,-5.0106971555,-3.2836173566  
 O, 1.1321921931,-3.8128478453,-3.3413665412  
 C, 1.5583600626,-6.1461113464,-3.0592740776  
 H, 2.6313384883,-6.0410903307,-3.2085776414  
 H, 1.0705252682,-6.3520548422,-4.0096238922  
 Cl, 1.2915887873,-7.5896899515,-1.9859992651  
 C, -0.4927593456,-4.3239655739,3.3738371399  
 C, 0.8276653579,-4.0131896203,3.6850219049  
 C, 1.4976657003,-3.0292812529,2.9626133919  
 C, 0.8678715586,-2.3447319805,1.9160690837

C, -0.4893116467,-2.6331364201,1.6261540242  
C, -1.1443771618,-3.6339067128,2.3547073368  
H, -1.0173742399,-5.0978593665,3.9222279142  
H, 1.3366023023,-4.5303001225,4.4902677805  
H, 2.5128740513,-2.7595432274,3.2300958958  
H, -2.1648427949,-3.8897715314,2.0925368032  
N, 1.4966398415,-1.3217689168,1.1921444308  
N, -1.0957764626,-1.9643523791,0.5518991702  
C, 2.7347076958,-1.4096128222,0.850035804  
H, 3.3210658637,-2.3114306344,1.0686867361  
C, -2.2879900179,-1.5235941416,0.6647529412  
H, -2.8389427494,-1.6151780195,1.6120195802  
C, 3.423830631,-0.3492839015,0.1463330835  
C, 4.7832602351,-0.5007538021,-0.1760841317  
C, 2.7491614277,0.8399775042,-0.2388323139  
C, 5.5141298161,0.4712623361,-0.8519711133  
H, 5.2645995755,-1.4255003457,0.1273203669  
C, 3.4743543495,1.8237386481,-0.9165174729  
C, 4.8176687964,1.6396831198,-1.2104902944  
H, 2.95669623,2.7286937628,-1.2107768067  
H, 5.3305045136,2.4328823422,-1.7389604148  
C, -3.0355579965,-0.8562743132,-0.4043021561  
C, -4.3997219052,-0.6027875741,-0.1709001341  
C, -2.4876654405,-0.4227824575,-1.6220212166  
C, -5.2262030445,0.0388203475,-1.0907287615  
H, -4.803594726,-0.9327090054,0.7780442368  
C, -3.2845173103,0.2339941434,-2.5485950044  
C, -4.6310293322,0.4564937779,-2.290393713  
H, -2.8288325235,0.5721285071,-3.4711248311  
H, -5.2212183161,0.969096391,-3.0409125857  
O, 1.4565379457,1.0524110747,0.0243225598  
H, 1.1013005672,0.2393221207,0.4626329234  
O, -1.1339167466,-0.5118967969,-1.9024001052  
H, 0.9750803799,-2.6967489529,-2.8218317736  
C, -6.7200352165,0.3050109842,-0.8351260756  
C, -7.1845419499,-0.2327609744,0.5304829713  
H, -8.249063325,-0.0228941506,0.6627294435  
H, -7.0504008556,-1.3152216924,0.6088797693  
H, -6.6511425791,0.2417422656,1.3587339028  
C, -6.9832534495,1.8283939827,-0.8694463048  
H, -8.0433058214,2.0341496891,-0.6930021633  
H, -6.4034916948,2.3423850938,-0.0981603814  
H, -6.715573761,2.2645086902,-1.8344666885  
C, -7.5583955573,-0.3857961957,-1.9356331116

H, -7.3082035508,-0.0129907932,-2.9314989069  
H, -7.3929760967,-1.4665423757,-1.931768097  
H, -8.6246036733,-0.203889348,-1.7704387012  
C, 7.0016565961,0.2430284245,-1.1769790246  
C, 7.6211187179,1.4348327875,-1.9299482063  
H, 7.5781466798,2.3551898143,-1.3409789157  
H, 8.6736947301,1.2278855515,-2.1413483579  
H, 7.1225475709,1.615675079,-2.8861305476  
C, 7.7956730023,0.0402151198,0.1340431591  
H, 7.7142480015,0.9198649023,0.7783467391  
H, 7.4315579986,-0.8213488458,0.6991228794  
H, 8.8554515357,-0.1273301754,-0.0826691371  
C, 7.1512722309,-1.013973034,-2.0650385894  
H, 6.598731014,-0.8969005901,-3.0011271009  
H, 8.2042021182,-1.1875079442,-2.3091650075  
H, 6.7739423925,-1.9096578602,-1.5657007326  
C, -0.6045178536,-1.7136496664,-2.2539316464  
O, -1.3510773128,-2.6825585282,-2.4694296056  
O, 0.6603388693,-1.680756707,-2.3655474407

|                                              |                             |
|----------------------------------------------|-----------------------------|
| Zero-point correction=                       | 0.624377 (Hartree/Particle) |
| Thermal correction to Energy=                | 0.664074                    |
| Thermal correction to Enthalpy=              | 0.665018                    |
| Thermal correction to Gibbs Free Energy=     | 0.547141                    |
| Sum of electronic and zero-point Energies=   | -2187.282452                |
| Sum of electronic and thermal Energies=      | -2187.242756                |
| Sum of electronic and thermal Enthalpies=    | -2187.241811                |
| Sum of electronic and thermal Free Energies= | -2187.359688                |

**TSD'-E'**

C, -0.026575335,-2.6857715494,-4.992121244  
C, 1.3506070506,-2.4816444672,-5.0698773187  
C, 2.0206302776,-1.9023179165,-3.9980962962  
C, 1.322209637,-1.5587601829,-2.8406965599  
C, -0.0677136488,-1.789323834,-2.7295746276  
C, -0.7265068783,-2.3349304827,-3.843861407  
H, -0.5608407601,-3.1017070097,-5.8386146286  
H, 1.893525058,-2.7331360397,-5.9726895234  
H, 3.0772745345,-1.6747559603,-4.077003865  
H, -1.8016786566,-2.4599878016,-3.8071310187  
N, 1.9772882683,-0.9373545988,-1.749555042  
N, -0.6868268426,-1.4049398396,-1.5440212931  
C, 3.2090399011,-1.1906549894,-1.3634780322  
H, 3.688515777,-2.0317232793,-1.8563641706  
C, -1.676485857,-2.0948121083,-1.1000442638  
H, -1.9676939823,-3.0172449803,-1.6232070612

C, 3.9451031307,-0.4947518757,-0.3814874268  
C, 5.2091031227,-1.0259379791,0.0079100383  
C, 3.4711161698,0.7235652147,0.2039908523  
C, 6.0006016696,-0.4247547883,0.9580213946  
H, 5.5276597707,-1.9439224323,-0.4710961312  
C, 4.2911439111,1.3372406491,1.1817784384  
C, 5.4950563755,0.774288821,1.5346377972  
H, 3.9383968728,2.2525241049,1.6395646659  
H, 6.082534385,1.2801493283,2.2930339249  
C, -2.5250749976,-1.8025527785,0.0415936635  
C, -3.6542249704,-2.6393793327,0.1961787804  
C, -2.3225905799,-0.7493645451,0.9645069663  
C, -4.6098999867,-2.451030701,1.1824126381  
H, -3.7636094768,-3.4495496864,-0.5147895773  
C, -3.2907919396,-0.5401714985,1.9567521659  
C, -4.3969849988,-1.3658641644,2.0535497554  
H, -3.1661956282,0.2838920182,2.6438154163  
H, -5.1132958421,-1.1603840403,2.8415384328  
O, 2.3333620756,1.2231060194,-0.1920066778  
O, -1.1723368641,-0.0550928918,0.9089651821  
C, -5.8496496347,-3.3451452587,1.347264628  
C, -5.8872042931,-4.485603883,0.3139690883  
H, -6.7812007044,-5.0950273349,0.4715980032  
H, -5.9257004156,-4.1044711647,-0.7103159431  
H, -5.0188381544,-5.1443689021,0.4037378406  
C, -5.8491206942,-3.976070875,2.7591800716  
H, -6.73003192,-4.6118538988,2.8925750311  
H, -4.9581714523,-4.5916714705,2.9104047161  
H, -5.8659313452,-3.2159454476,3.5436025121  
C, -7.1269222052,-2.4918437886,1.1692778379  
H, -7.177778892,-1.6820625446,1.9006278867  
H, -7.1591750801,-2.0426631685,0.1729676213  
H, -8.0206503539,-3.1114684106,1.2941046878  
C, 7.3619690661,-0.9752405269,1.409417216  
C, 7.3214983408,-1.2698159551,2.9270807818  
H, 6.5538273449,-2.0122173493,3.160897282  
H, 8.2869232064,-1.659774211,3.26321359  
H, 7.1062170374,-0.372475666,3.511967773  
C, 7.7315788681,-2.2776335854,0.6776099766  
H, 7.0024613383,-3.0707424206,0.8659098712  
H, 7.8100189808,-2.1299332009,-0.4033058905  
H, 8.7024915646,-2.6344078476,1.0305577494  
C, 8.4625083525,0.0719684023,1.1193738496  
H, 8.2782658882,1.0129409093,1.6431162076

H, 9.4379292517,-0.3020349631,1.4444883852  
H, 8.5211196724,0.2905940538,0.0496638262  
C, -1.1133976843,1.348682633,1.3018874917  
O, -2.1403225052,2.0080392958,1.2298854882  
O, 0.0563016551,1.6597745366,1.6089680226  
H, 2.0883611171,2.1906868785,0.2909987809  
C, 1.2160917407,4.4218894369,0.4946968079  
C, 0.1962552781,3.9307556256,1.4204662014  
O, 2.0301073153,3.358069814,0.9110367192  
H, 0.9148230117,4.3753078729,-0.5587001612  
H, -0.7903329312,3.599372667,1.1259301047  
H, 0.3781987582,4.0780949881,2.4759490259  
C, 1.8919202864,5.7480189499,0.7979148375  
H, 2.7974760858,5.8421680948,0.2004132891  
H, 2.1359863845,5.826956081,1.8554211812  
Cl, 0.8235533744,7.1622105441,0.3850840429  
H, 1.4421664435,-0.2480383315,-1.2116440889

|                                              |                             |
|----------------------------------------------|-----------------------------|
| Zero-point correction=                       | 0.625726 (Hartree/Particle) |
| Thermal correction to Energy=                | 0.665385                    |
| Thermal correction to Enthalpy=              | 0.666329                    |
| Thermal correction to Gibbs Free Energy=     | 0.550155                    |
| Sum of electronic and zero-point Energies=   | -2187.273178                |
| Sum of electronic and thermal Energies=      | -2187.233520                |
| Sum of electronic and thermal Enthalpies=    | -2187.232576                |
| Sum of electronic and thermal Free Energies= | -2187.348750                |

#### TSE-F

C, 1.4135094048,0.0176273573,-4.5596666252  
C, 1.8090095357,1.062539534,-3.5000369797  
H, 0.871116848,0.5080837451,-5.3719855387  
H, 2.0455755705,2.0378749502,-3.9136319482  
H, 2.5989066331,0.721087836,-2.8331461475  
O, 0.5155431323,-0.8785910073,-3.9344242021  
C, 2.6136829886,-0.7307111499,-5.1275676063  
H, 2.2870564052,-1.4715705698,-5.8527816578  
H, 3.1985250149,-1.2060921413,-4.3413953415  
Cl, 3.724782259,0.4126837757,-5.9966340247  
C, 0.6448924342,4.2234412162,1.78296804  
C, -0.6518432692,4.135709449,2.2805454614  
C, -1.3795385049,2.961787492,2.1068436607  
C, -0.8356137792,1.8633644948,1.4293380372  
C, 0.4979684304,1.9388111089,0.9539144834  
C, 1.2119739308,3.1311471247,1.1312694505  
H, 1.2187848142,5.134951893,1.9063276175  
H, -1.0944849735,4.9713147256,2.8104145904

H, -2.3718099735,2.8762314761,2.534791088  
H, 2.2145464001,3.2013508005,0.7245152009  
N, -1.5238645866,0.6503715383,1.2762718618  
N, 1.0324563176,0.8514767535,0.2457015182  
C, -2.7964670569,0.6173457084,1.0819072164  
H, -3.3797647577,1.5396002538,0.9676857507  
C, 2.1949882551,0.4187124585,0.5664324594  
H, 2.7204477173,0.8580112549,1.427903459  
C, -3.5303250086,-0.6265057684,0.9822482246  
C, -4.9284310782,-0.5983449173,0.803770666  
C, -2.8650188386,-1.8760632936,1.054876002  
C, -5.6956221879,-1.7502612068,0.7058271917  
H, -5.3974349052,0.3770358797,0.7476798863  
C, -3.6308325897,-3.0454615122,0.9554456261  
C, -5.0019672906,-2.9762493477,0.7883534541  
H, -3.118166031,-3.9982706074,1.0105581078  
H, -5.5530092288,-3.9073610583,0.7166030795  
C, 2.941426739,-0.6503965168,-0.0856437573  
C, 4.2155217561,-0.9321048916,0.4561733269  
C, 2.4717747897,-1.4259256475,-1.1838922278  
C, 5.0569103592,-1.9288888037,-0.017588611  
H, 4.5292996911,-0.3208185834,1.2941494707  
C, 3.3259452982,-2.4495919646,-1.6566216153  
C, 4.5663147002,-2.6903996289,-1.0951406167  
H, 2.9620711686,-3.0774131049,-2.4635281303  
H, 5.1643984825,-3.4983789687,-1.503128216  
O, -1.5428896581,-1.9821580471,1.2117700758  
H, -1.1687960896,-1.0630913311,1.2357351118  
O, 1.2963810863,-1.2543372334,-1.7592941286  
H, 1.0016654961,-1.3439409309,-3.0850842874  
C, 6.441314793,-2.2307599975,0.5796957566  
C, 6.7997636478,-1.2737039051,1.730801582  
H, 7.7915673237,-1.5199580306,2.1195169506  
H, 6.8244679098,-0.231700494,1.3995745601  
H, 6.0921608391,-1.3535386367,2.5604639767  
C, 6.4613485971,-3.6756648642,1.1307849799  
H, 7.4443680889,-3.9122226682,1.5501978728  
H, 5.7146767234,-3.8006260491,1.919496702  
H, 6.2470574753,-4.4098267475,0.3504482904  
C, 7.5215092438,-2.0882066999,-0.5176639135  
H, 7.3455872539,-2.7717070346,-1.3517985125  
H, 7.5383426313,-1.0705644171,-0.9177195762  
H, 8.5128321602,-2.3102860191,-0.1102645152  
C, -7.2216424678,-1.7406257418,0.5143751635

C, -7.7906452294,-0.3114345022,0.4533884152  
 H, -7.3752507783,0.2554113491,-0.3844530082  
 H, -8.8747793505,-0.3521676201,0.3181577776  
 H, -7.5946027508,0.2440392815,1.3748118062  
 C, -7.5822999978,-2.4577204474,-0.8074211023  
 H, -7.1250359402,-1.9515346932,-1.6618773368  
 H, -7.2398592677,-3.4953233357,-0.8130617499  
 H, -8.6668644394,-2.4646988606,-0.9549620858  
 C, -7.8968163399,-2.4764314204,1.6951868416  
 H, -7.6641721227,-1.9849689248,2.6437907126  
 H, -8.9843691492,-2.4814191864,1.5711154796  
 H, -7.5663967076,-3.5153090255,1.7683592273  
 C, -0.095517757,0.2621094548,-2.3975200002  
 O, 0.6149221839,1.2782537818,-2.6893161851  
 O, -1.1074216336,-0.0620865093,-1.9620236955  
 Zero-point correction= 0.627468 (Hartree/Particle)  
 Thermal correction to Energy= 0.666684  
 Thermal correction to Enthalpy= 0.667629  
 Thermal correction to Gibbs Free Energy= 0.551773  
 Sum of electronic and zero-point Energies= -2187.293770  
 Sum of electronic and thermal Energies= -2187.254554  
 Sum of electronic and thermal Enthalpies= -2187.253609  
 Sum of electronic and thermal Free Energies= -2187.369465

**TSG-H**

C, -0.9162479236,-2.5346513009,3.7952889284  
 C, -0.3913172829,-2.1081263096,2.4932777246  
 H, -1.5188839727,-3.4433962551,3.7502015983  
 H, -0.6947835165,-2.5495877282,1.5581804135  
 H, 0.2547817044,-1.2411686485,2.4726556018  
 O, -1.7053006168,-1.348074998,3.8636529599  
 C, 0.0377188048,-2.5418017135,4.9724636034  
 H, -0.5225739017,-2.6365784669,5.9002662755  
 H, 0.6398736127,-1.6360437104,4.993033998  
 Cl, 1.1700135724,-3.9522213545,4.8710020378  
 C, 0.4863069947,3.9784141933,3.2921919981  
 C, -0.88432127,3.8508095396,3.5139569807  
 C, -1.5902934216,2.8066577586,2.9276259536  
 C, -0.9490040372,1.8696072046,2.1033812116  
 C, 0.4389783739,2.02134411,1.8510713853  
 C, 1.1375451404,3.0682258589,2.4685829087  
 H, 1.0478194923,4.7724909467,3.7704422823  
 H, -1.4000023776,4.5517898874,4.1606226857  
 H, -2.6458507019,2.6744750832,3.1342094063  
 H, 2.207899106,3.1541622151,2.3208108122



N, -1.6282743567,0.7640980311,1.5904154304  
N, 1.0393718421,1.0833438203,0.9965881734  
C, -2.6834743047,0.9323194408,0.8796889082  
H, -2.9863538254,1.9496897276,0.5894639018  
C, 2.1083318314,1.3335719447,0.321928917  
H, 2.587882902,2.3186759463,0.3458903742  
C, -3.5250208514,-0.1200331287,0.3382672884  
C, -4.3905119908,0.2522372748,-0.7117273046  
C, -3.4943081151,-1.485697607,0.7749471666  
C, -5.1917468672,-0.6464578132,-1.4028508609  
H, -4.3972243617,1.3001076713,-0.98923263  
C, -4.293899149,-2.4014441407,0.0364424224  
C, -5.1067197597,-1.9978367625,-0.9995729147  
H, -4.2601210548,-3.4393394595,0.34775754  
H, -5.7028921766,-2.7483807104,-1.507982772  
C, 2.7270963566,0.3372603186,-0.5318227517  
C, 3.9342603286,0.6312213158,-1.1866079251  
C, 2.1305372589,-0.9355296374,-0.7283431929  
C, 4.5856131717,-0.2769708166,-2.0180395611  
H, 4.3624756124,1.614737099,-1.0201188056  
C, 2.7699547263,-1.8531101401,-1.5613125918  
C, 3.9688359573,-1.5284779897,-2.1839784517  
H, 2.307395676,-2.8211806807,-1.711995829  
H, 4.4251088527,-2.2759278783,-2.819687115  
O, -2.8297448478,-1.926939093,1.7988310756  
H, -2.3536137753,-1.3932852241,3.0383830606  
O, 0.9629508718,-1.2709226337,-0.1521554498  
H, 0.6487570612,-0.4741671547,0.35575169  
C, 5.9121582796,0.1048177562,-2.7002405208  
C, 6.9767564067,0.4147749561,-1.6225042085  
H, 7.9254590886,0.6938549449,-2.0914261996  
H, 6.6693060841,1.240665819,-0.9763368356  
H, 7.1541560477,-0.4573942548,-0.9874147795  
C, 6.4514892624,-1.0264538955,-3.5948152922  
H, 7.3905417439,-0.7116406162,-4.057584443  
H, 6.6555487208,-1.9359818228,-3.0232450567  
H, 5.7550189358,-1.2757829761,-4.4001046097  
C, 5.7005253187,1.3552274414,-3.5846436307  
H, 4.9524867517,1.1629445155,-4.3584659784  
H, 5.3620811033,2.213777299,-2.9997386802  
H, 6.6361226082,1.6371879412,-4.0775347627  
C, -6.1252266704,-0.2433545431,-2.5548701538  
C, -7.5811147983,-0.6281800341,-2.2014454636  
H, -7.9132403173,-0.1077265226,-1.299019478

|                                              |                             |
|----------------------------------------------|-----------------------------|
| H, -8.2565310371,-0.3578476745,-3.0194212346 |                             |
| H, -7.6858608729,-1.7012176553,-2.0249093835 |                             |
| C, -6.0867060329,1.2694261472,-2.8370515456  |                             |
| H, -6.3978207853,1.8528660009,-1.9660991404  |                             |
| H, -5.0885101767,1.6022468,-3.1344709964     |                             |
| H, -6.7712187283,1.5082130123,-3.6555981037  |                             |
| C, -5.7022390104,-0.9840819923,-3.8453337603 |                             |
| H, -5.7504941503,-2.0686854138,-3.7235631577 |                             |
| H, -6.361552555,-0.7123136629,-4.6759318345  |                             |
| H, -4.6772803886,-0.7248549209,-4.1238817086 |                             |
| Zero-point correction=                       | 0.610451 (Hartree/Particle) |
| Thermal correction to Energy=                | 0.647779                    |
| Thermal correction to Enthalpy=              | 0.648723                    |
| Thermal correction to Gibbs Free Energy=     | 0.536387                    |
| Sum of electronic and zero-point Energies=   | -1998.659971                |
| Sum of electronic and thermal Energies=      | -1998.622644                |
| Sum of electronic and thermal Enthalpies=    | -1998.621699                |
| Sum of electronic and thermal Free Energies= | -1998.734035                |

#### TSG'-H

C, 0.071777151,1.1379357659,-2.1721274832  
 C, -0.3817399691,2.0302254797,-1.1000349468  
 H, -0.7394046062,0.8722012194,-2.8709773086  
 H, -1.368021025,2.4671496316,-1.0612018457  
 H, 0.3703682786,2.4308314397,-0.4363619095  
 O, 0.4377443828,0.137604074,-1.2932050629  
 C, 1.2856416093,1.6109366919,-2.9657505318  
 H, 1.6593966675,0.7866798111,-3.5714117383  
 H, 2.0678079466,1.9671044772,-2.2987549518  
 Cl, 0.8934636339,2.9828061593,-4.1120303629  
 C, 0.7210270396,-5.2036871898,-1.4858793237  
 C, -0.6166605539,-5.0125616038,-1.8216215926  
 C, -1.2708027037,-3.8519657296,-1.4189405107  
 C, -0.6020966289,-2.8870555414,-0.6655679544  
 C, 0.7556433958,-3.0680649155,-0.3272497878  
 C, 1.3995496139,-4.2377483637,-0.7492181536  
 H, 1.2370425162,-6.1058255011,-1.7934074818  
 H, -1.1474304799,-5.7539022835,-2.4067990312  
 H, -2.295720647,-3.6758281744,-1.7238463105  
 H, 2.429572089,-4.399155493,-0.4535142835  
 N, -1.2349128527,-1.6845849392,-0.258596407  
 N, 1.3813362977,-2.1168100439,0.4858685574  
 C, -2.4939537014,-1.6199394453,0.117074527  
 H, -3.0242596819,-2.5691520047,0.1456221602  
 C, 2.540814448,-1.650149969,0.1758250915

H, 3.0323357344,-1.9458163377,-0.7574888702  
C, -3.2239693332,-0.4675506577,0.4798537475  
C, -4.618655234,-0.6116032593,0.7278529738  
C, -2.5858824194,0.8231489837,0.6229493943  
C, -5.4306294146,0.4559810498,1.0374685385  
H, -5.0361430985,-1.6089804334,0.6485231744  
C, -3.4542309923,1.9176301838,0.9285051284  
C, -4.8009451492,1.7325981558,1.1191465824  
H, -3.0061549839,2.8981098341,1.043958527  
H, -5.4058809357,2.6003556811,1.3607791654  
C, 3.2524342244,-0.7088429298,1.0120767154  
C, 4.5335366831,-0.2684508845,0.6216403364  
C, 2.6857189633,-0.2149242835,2.2122823004  
C, 5.2783781507,0.6310178833,1.3708149874  
H, 4.9290464034,-0.6666891324,-0.3051604017  
C, 3.4270321632,0.6966281131,2.975091609  
C, 4.6835266535,1.1006129923,2.561192921  
H, 2.9880085613,1.0741564056,3.8907041328  
H, 5.220156996,1.8073106104,3.1846524524  
O, -1.3202618522,0.9437664196,0.5125927098  
H, -0.6638291702,-0.8042324232,-0.3862345155  
O, 1.4753287153,-0.5824463303,2.6458395083  
H, 1.0895603165,-1.1936265834,1.9716789072  
C, 6.6795168506,1.1173719013,0.9643322004  
C, 7.6963158276,0.749456159,2.0699095842  
H, 8.6994233254,1.089998849,1.7947126304  
H, 7.4408391739,1.2100751378,3.0271147202  
H, 7.7334405194,-0.3329783121,2.2200074113  
C, 7.1557508259,0.4803016761,-0.3536912402  
H, 8.1539300474,0.8508288835,-0.6017121174  
H, 7.2179333865,-0.6089828116,-0.2789904045  
H, 6.4953960568,0.7304058811,-1.1886355122  
C, 6.6605564155,2.6523063857,0.7774488623  
H, 5.9572207411,2.94023051,-0.0085473118  
H, 6.3658410707,3.1690605152,1.6938646124  
H, 7.6539311941,3.0151406093,0.4955022969  
C, -6.9401219379,0.3346199496,1.2975380274  
C, -7.7126704505,1.2055152273,0.2792861873  
H, -7.5148782475,0.8758832977,-0.7443141505  
H, -8.7900304747,1.135249443,0.4580061027  
H, -7.4337806703,2.2595236688,0.3500189206  
C, -7.4382957169,-1.1154323177,1.1626290983  
H, -7.2708324961,-1.5116651483,0.1570549608  
H, -6.9511931598,-1.7808219806,1.8808884649

|                                              |                             |
|----------------------------------------------|-----------------------------|
| H, -8.5134832828,-1.1538618381,1.3558112989  |                             |
| C, -7.2573372219,0.8202925453,2.7313792366   |                             |
| H, -6.9600497754,1.8605250134,2.8843312097   |                             |
| H, -8.3313802393,0.7502147318,2.929189132    |                             |
| H, -6.7335455437,0.2112323442,3.4729741072   |                             |
| Zero-point correction=                       | 0.612704 (Hartree/Particle) |
| Thermal correction to Energy=                | 0.649698                    |
| Thermal correction to Enthalpy=              | 0.650642                    |
| Thermal correction to Gibbs Free Energy=     | 0.540060                    |
| Sum of electronic and zero-point Energies=   | -1998.665048                |
| Sum of electronic and thermal Energies=      | -1998.628054                |
| Sum of electronic and thermal Enthalpies=    | -1998.627110                |
| Sum of electronic and thermal Free Energies= | -1998.737692                |

### TSG'-H'

C, -0.4478632528,-2.2362121076,2.0865067322  
 C, 0.43769575,-1.1930081135,2.634525389  
 H, -0.999550942,-1.9288663857,1.1887440382  
 H, -0.0285860455,-0.2390494385,2.7972823168  
 H, 1.2104237285,-1.5027930312,3.3272459719  
 O, -1.1500919796,-2.1584835005,3.291120803  
 C, 0.0944236156,-3.6444357125,1.9238604444  
 H, -0.7393368458,-4.3416288775,1.885368023  
 H, 0.7532384684,-3.9119239593,2.7481031709  
 Cl, 1.0401669102,-3.8945249046,0.3785185198  
 C, -0.9516221905,5.7912085477,0.2744132183  
 C, 0.4195534905,5.8202247993,0.0245903044  
 C, 1.1535801324,4.6417882847,0.0683621737  
 C, 0.5257101475,3.4223778298,0.3347158901  
 C, -0.8710577335,3.3730159974,0.5739371608  
 C, -1.5808806984,4.5860670803,0.5550834373  
 H, -1.5255228132,6.7106082154,0.2729894171  
 H, 0.9228477049,6.7585799951,-0.1741615467  
 H, 2.2251399529,4.6852764069,-0.0799505243  
 H, -2.635297957,4.570700323,0.802018664  
 N, 1.2407435213,2.2063843785,0.4007180353  
 N, -1.4605426056,2.1504961671,0.8934191939  
 C, 2.4927185969,1.998954105,0.0298581783  
 H, 2.9865068959,2.8228414669,-0.4743990679  
 C, -2.6413552195,1.9023788434,0.4417512027  
 H, -3.0900230815,2.5998691821,-0.2804893789  
 C, 3.2465948812,0.8306018864,0.2486381801  
 C, 4.5999091416,0.8022552115,-0.201335953  
 C, 2.6984688813,-0.2973106014,0.9658360138  
 C, 5.435351407,-0.2603983942,0.0439590104

H, 4.957480334,1.6679372393,-0.7467060252  
C, 3.5844551378,-1.376045836,1.2322200447  
C, 4.8811310743,-1.3477866357,0.7824794474  
H, 3.2038804828,-2.2400874177,1.7602785222  
H, 5.50713233,-2.2071345196,0.9966877393  
C, -3.4867587606,0.7530408559,0.7134025856  
C, -4.5815448487,0.5734146841,-0.1564003421  
C, -3.2759187325,-0.2001212151,1.7477604624  
C, -5.4398213555,-0.5195531372,-0.1035576267  
H, -4.7313657001,1.3314627913,-0.9189170451  
C, -4.1249693315,-1.3174477915,1.7940094956  
C, -5.1686426136,-1.4712023094,0.8937128433  
H, -3.9479591675,-2.0606918465,2.5631419226  
H, -5.7896980482,-2.353175808,0.9863135937  
O, 1.460981533,-0.2634236127,1.3132187117  
O, -2.3162998295,-0.0190438494,2.6466443382  
H, -1.9999276771,-0.9156897013,3.0529757279  
C, -6.6055319037,-0.646892256,-1.1009370031  
C, -6.0575659401,-0.656694841,-2.5466803306  
H, -6.8774262001,-0.7477953593,-3.2661558272  
H, -5.5118431703,0.2607387802,-2.7798479488  
H, -5.3756193213,-1.4976290734,-2.6987889778  
C, -7.4106971333,-1.9422097332,-0.887937589  
H, -8.222453204,-1.9941579215,-1.6184555064  
H, -6.7899676857,-2.8325347674,-1.0208043799  
H, -7.8603533024,-1.9832833298,0.1079195421  
C, -7.5678667267,0.5509428839,-0.9272931642  
H, -7.975230363,0.5785722624,0.0869637029  
H, -7.0643486725,1.5034757155,-1.109956312  
H, -8.4047132584,0.4765077938,-1.6292206702  
C, 6.8961465229,-0.3277434036,-0.4273285295  
C, 7.0791006032,-1.545592696,-1.3632000815  
H, 6.439599573,-1.4587398667,-2.2456301889  
H, 8.1180790474,-1.6131979424,-1.6996422513  
H, 6.8316032179,-2.4851946182,-0.8636178563  
C, 7.3142045342,0.9371014632,-1.1977195097  
H, 6.7108995451,1.0836051222,-2.0980804519  
H, 7.2342100295,1.8348766563,-0.5782101877  
H, 8.3570307171,0.8477522575,-1.512716942  
C, 7.8293644247,-0.4770469345,0.7967229771  
H, 7.6110256115,-1.3818036549,1.3690569536  
H, 8.8732892342,-0.5345713187,0.4739491471  
H, 7.7284086417,0.3777911352,1.4708869865  
H, 0.7569147603,1.3997236118,0.8164329748

|                                              |                             |
|----------------------------------------------|-----------------------------|
| Zero-point correction=                       | 0.614567 (Hartree/Particle) |
| Thermal correction to Energy=                | 0.651032                    |
| Thermal correction to Enthalpy=              | 0.651976                    |
| Thermal correction to Gibbs Free Energy=     | 0.543846                    |
| Sum of electronic and zero-point Energies=   | -1998.692877                |
| Sum of electronic and thermal Energies=      | -1998.656412                |
| Sum of electronic and thermal Enthalpies=    | -1998.655468                |
| Sum of electronic and thermal Free Energies= | -1998.763598                |

**TSI-J**

C, -1.0551994805,-2.884782318,-1.8019614449  
 C, -1.4497532712,-1.419711428,-1.7319227758  
 H, -1.8786450963,-3.4684732317,-2.2251565874  
 H, -1.6369608019,-1.0312770991,-2.7376376722  
 H, -0.6594717006,-0.8329123548,-1.2562538071  
 O, -0.8152236863,-3.3616686116,-0.4666141576  
 C, 0.2220897556,-3.1495492767,-2.592285676  
 H, 0.4993931184,-4.1957666554,-2.49370538  
 H, 1.0351497343,-2.5046234465,-2.2678778329  
 Cl, -0.0243756394,-2.8455721483,-4.3708654602  
 C, 0.8026969064,-1.7028465984,5.0913814625  
 C, -0.5883266208,-1.7423057668,5.0449572523  
 C, -1.2544423009,-1.3943164209,3.8739052047  
 C, -0.5466885481,-1.0023045846,2.7318460044  
 C, 0.8658942048,-0.9562585081,2.780179956  
 C, 1.520830621,-1.3126284696,3.9659120792  
 H, 1.3295748096,-1.9948642228,5.992319257  
 H, -1.1559266064,-2.0644732977,5.9102215815  
 H, -2.3336519335,-1.4686759299,3.815237115  
 H, 2.6045923748,-1.3182101399,3.9857455591  
 N, -1.2106880794,-0.701599194,1.5268881559  
 N, 1.561477362,-0.579122873,1.6213380383  
 C, -2.1254367156,0.1899978737,1.5491140717  
 H, -2.3064164912,0.7613670212,2.4699790156  
 C, 2.6109719037,0.1651443194,1.6753227144  
 H, 2.9557439189,0.5908310817,2.6250007937  
 C, -2.9850137854,0.5998322876,0.4313552481  
 C, -3.6780332441,1.8154934172,0.5936956171  
 C, -3.19698284,-0.1310251413,-0.7511471387  
 C, -4.5310234622,2.3450988396,-0.3713075499  
 H, -3.5186085376,2.3513780832,1.5211275472  
 C, -4.0595479593,0.3742299724,-1.7215745041  
 C, -4.7062760901,1.5890452801,-1.5404591432  
 H, -4.2314581803,-0.2152468543,-2.6148158431  
 H, -5.3691798842,1.94174087,-2.3219091368

C, 3.3795743224,0.4991021592,0.4924694584  
 C, 4.5167882127,1.3229334045,0.6054053246  
 C, 2.9987927569,0.0180670502,-0.7825178062  
 C, 5.2914769254,1.6833166984,-0.4889081977  
 H, 4.7759639439,1.6728189456,1.5974949747  
 C, 3.7679371408,0.3753687822,-1.8939515905  
 C, 4.8804672517,1.1859350942,-1.7425702072  
 H, 3.4728911697,0.0060258453,-2.8688079462  
 H, 5.4491214919,1.4381852032,-2.6305045596  
 O, -2.6450094031,-1.3716283281,-0.9408912067  
 H, -1.2832445517,-2.9101615521,0.5968544768  
 O, 1.9243548614,-0.7727664348,-0.9512608239  
 H, 1.5179564806,-0.9124746323,-0.0493138474  
 C, 6.5392658831,2.5768420267,-0.384754434  
 C, 7.7714721185,1.8082366917,-0.9156855366  
 H, 8.6665639293,2.4347370192,-0.8535945503  
 H, 7.9480664029,0.90252257,-0.329296696  
 H, 7.646764799,1.5106801425,-1.9593533836  
 C, 6.330893726,3.8553270256,-1.2297132326  
 H, 7.2140131351,4.4988944583,-1.1706800801  
 H, 6.1598852706,3.6220724788,-2.2833063024  
 H, 5.4697135336,4.4248944956,-0.8699243385  
 C, 6.8294704909,3.0021213975,1.0659350591  
 H, 6.0073884078,3.5835927345,1.4925124377  
 H, 7.0132516952,2.1396523157,1.7127217781  
 H, 7.7242635089,3.6294288358,1.0928923504  
 C, -5.2737205669,3.6809576601,-0.1962297358  
 C, -6.7988350978,3.4326999341,-0.2591687315  
 H, -7.1175876931,2.7559088224,0.5380954788  
 H, -7.3419237075,4.3754088176,-0.1430149751  
 H, -7.1001409993,2.9913931836,-1.2119516223  
 C, -4.9516334128,4.3567258764,1.1490533246  
 H, -5.2485004893,3.7358282062,1.9988037332  
 H, -3.8867872821,4.5860161466,1.2451692252  
 H, -5.4988852965,5.299763486,1.2250074936  
 C, -4.863628103,4.6473427552,-1.331772882  
 H, -5.1075923036,4.2440086265,-2.3172431912  
 H, -5.3869522934,5.6021405045,-1.2244563363  
 H, -3.7884237615,4.8441520326,-1.3079763971  
 C, -1.8748607955,-4.413537104,0.2371601632  
 O, -1.9845999213,-3.7253784677,1.2776256198  
 O, -2.2214382643,-5.3860698818,-0.323570041

Zero-point correction=

0.626493 (Hartree/Particle)

Thermal correction to Energy=

0.666144

|                                              |              |
|----------------------------------------------|--------------|
| Thermal correction to Enthalpy=              | 0.667088     |
| Thermal correction to Gibbs Free Energy=     | 0.550165     |
| Sum of electronic and zero-point Energies=   | -2187.319648 |
| Sum of electronic and thermal Energies=      | -2187.279997 |
| Sum of electronic and thermal Enthalpies=    | -2187.279053 |
| Sum of electronic and thermal Free Energies= | -2187.395976 |

**TSI'-J'**

C, -0.9647113097,-2.7243829522,-0.7561163214  
 C, -1.7931227294,-1.8890499311,-1.781842834  
 H, -1.3810102752,-2.4678742148,0.2469492552  
 H, -1.2163882311,-1.7912738014,-2.6962872532  
 H, -2.784604301,-2.2911209093,-1.998885953  
 O, 0.3570604444,-2.5006058169,-0.8350383951  
 C, -1.2363086897,-4.2295560053,-0.9745202751  
 H, -0.6169238413,-4.7983795968,-0.2880185975  
 H, -1.0468227031,-4.5349686285,-2.0016862411  
 Cl, -2.9877304698,-4.7694402841,-0.6213477536  
 C, 1.2033017498,5.3090792267,-2.6061746127  
 C, -0.1879835349,5.38209271,-2.5875952272  
 C, -0.9272298511,4.2872671648,-2.1548738449  
 C, -0.2819827698,3.1254331615,-1.7278262581  
 C, 1.1258496094,3.031926954,-1.7521711651  
 C, 1.849037211,4.1463774375,-2.2012142255  
 H, 1.7874913751,6.1518930043,-2.9565369395  
 H, -0.6971611088,6.2739056776,-2.9312774775  
 H, -2.0101988772,4.3205312073,-2.1780648724  
 H, 2.9287415459,4.072617955,-2.2525287754  
 N, -1.0357399815,2.0296945197,-1.228225513  
 N, 1.7460567255,1.8379666524,-1.3828517402  
 C, -2.1176368302,2.1680547541,-0.4865399894  
 H, -2.339120152,3.1885243239,-0.190917764  
 C, 2.7179861148,1.8572307649,-0.5243979168  
 H, 2.9595916991,2.7890583635,0.0015980432  
 C, -2.9947703666,1.161758502,-0.0280433821  
 C, -4.0287725268,1.5637909311,0.8664390908  
 C, -2.907411547,-0.2065500912,-0.4283830922  
 C, -4.9489736208,0.679150799,1.3818092713  
 H, -4.0642080828,2.6112669032,1.138686245  
 C, -3.84704855,-1.1114760119,0.0937685681  
 C, -4.8217521189,-0.6703894766,0.9669334952  
 H, -3.7993080632,-2.1594361264,-0.1639281972  
 H, -5.5163161571,-1.4099594427,1.3482563316  
 C, 3.5246729087,0.7167087411,-0.194826344  
 C, 4.4470823481,0.8152320386,0.875355886



C, 3.4479453248,-0.4884957926,-0.937703331  
 C, 5.2719522112,-0.2312584852,1.2416948895  
 H, 4.4809868799,1.7555962258,1.4125093046  
 C, 4.2802338915,-1.5565422189,-0.5748070056  
 C, 5.1545982759,-1.422049437,0.4840380682  
 H, 4.1825787506,-2.4836769002,-1.1233997887  
 H, 5.7704187244,-2.2769226718,0.7402344358  
 O, -1.9571818983,-0.5130687916,-1.3054982359  
 O, 2.6472156327,-0.6343762688,-1.9938854665  
 H, 2.0450548755,0.1352512879,-2.0404569041  
 C, 6.2743428271,-0.1571282711,2.4048883733  
 C, 5.9232509273,-1.2345587231,3.457275729  
 H, 6.6341443944,-1.2007082469,4.2887692738  
 H, 4.9194232981,-1.0736664061,3.8593829932  
 H, 5.9539465367,-2.2410986258,3.0341664722  
 C, 7.7035210691,-0.4092632099,1.8708211598  
 H, 8.4292146474,-0.3701950231,2.6890859722  
 H, 7.7918934388,-1.3887127654,1.3953259382  
 H, 7.9823184418,0.3466752659,1.1315037421  
 C, 6.2571614504,1.2159297815,3.100318706  
 H, 6.5254551711,2.0233898277,2.4130404131  
 H, 5.2772778823,1.4409200312,3.5307915837  
 H, 6.9842183827,1.2239661677,3.9167577408  
 C, -6.0661274033,1.0802383316,2.3573030931  
 C, -5.8949424897,0.2974936739,3.6800191726  
 H, -4.9337469079,0.5252929049,4.1483312054  
 H, -6.6885460534,0.5667428424,4.3829357018  
 H, -5.943390081,-0.7827354451,3.5251720062  
 C, -6.0405156192,2.5847507953,2.679899979  
 H, -5.1021660323,2.883944173,3.1555050517  
 H, -6.1867630922,3.1967655681,1.7851727971  
 H, -6.8492813591,2.8235068587,3.3748013868  
 C, -7.4395437476,0.740864898,1.7326911753  
 H, -7.5368638845,-0.3249335573,1.5138198738  
 H, -8.2446892759,1.0111811866,2.4219064888  
 H, -7.5925658825,1.2895407116,0.7993960157  
 H, -0.7091962201,1.0812710507,-1.4215338677  
 C, 1.3969103262,-3.2463608664,-2.5502042564  
 O, 2.3292644215,-3.7284718051,-2.0269874498  
 O, 0.6796433629,-2.9337129142,-3.4346337123

|                                          |                             |
|------------------------------------------|-----------------------------|
| Zero-point correction=                   | 0.629866 (Hartree/Particle) |
| Thermal correction to Energy=            | 0.669664                    |
| Thermal correction to Enthalpy=          | 0.670608                    |
| Thermal correction to Gibbs Free Energy= | 0.554374                    |

|                                              |              |
|----------------------------------------------|--------------|
| Sum of electronic and zero-point Energies=   | -2187.321777 |
| Sum of electronic and thermal Energies=      | -2187.281980 |
| Sum of electronic and thermal Enthalpies=    | -2187.281036 |
| Sum of electronic and thermal Free Energies= | -2187.397270 |

**TSJ-K**

C, -0.9136095526,1.8537169523,1.8989438068  
 C, -0.1370857471,1.2988047015,0.7614639389  
 H, -0.2756467283,1.8286871091,2.7929299172  
 H, 0.7091302212,1.8951162615,0.4455901739  
 H, -0.6462544074,0.7567198498,-0.0226148863  
 O, -2.1345273497,1.1997459303,2.1116649549  
 C, -1.2944721095,3.3253489666,1.6206134643  
 H, -1.952499502,3.6594377179,2.4171484563  
 H, -1.7894473236,3.439403023,0.6590081511  
 Cl, 0.1493382734,4.424100577,1.6255154609  
 C, -0.3226769784,-6.0272912616,-0.2064831672  
 C, 0.9612300277,-5.9335250522,0.3199807431  
 C, 1.5838363112,-4.6900346037,0.4042590708  
 C, 0.9325343021,-3.5354981821,-0.0360651964  
 C, -0.3697687728,-3.6274786766,-0.5719854753  
 C, -0.9794787256,-4.8817382087,-0.651677547  
 H, -0.8170457463,-6.989423471,-0.2740066275  
 H, 1.4755809136,-6.8187566139,0.6749307471  
 H, 2.5640085314,-4.5981481767,0.8585768466  
 H, -1.9665907182,-4.9516716566,-1.0938828043  
 N, 1.512029453,-2.2596988127,0.1303572841  
 N, -0.9720522758,-2.4757321803,-1.1082314242  
 C, 2.6810220589,-2.0001302194,-0.3225862007  
 H, 3.2443579206,-2.7329303033,-0.9118089859  
 C, -2.1133408278,-2.0705398383,-0.671246347  
 H, -2.6088637109,-2.5656825794,0.168039947  
 C, 3.3184776357,-0.710332713,-0.0845358002  
 C, 4.5806081763,-0.4428493099,-0.6379129746  
 C, 2.7069924424,0.2764354785,0.7155216813  
 C, 5.2488062893,0.7639242601,-0.4405690922  
 H, 5.0298023587,-1.221899588,-1.2412811513  
 C, 3.3649304278,1.4831350573,0.9433243409  
 C, 4.6069055302,1.7171579855,0.3679828436  
 H, 2.9029205925,2.2256108179,1.583039662  
 H, 5.0880688337,2.6677667366,0.5646478857  
 C, -2.7739982677,-0.9016874492,-1.2237453692  
 C, -3.9955339512,-0.4773265202,-0.6671564869  
 C, -2.1910069867,-0.152085844,-2.2733802377  
 C, -4.6608844958,0.6596513548,-1.105571575

H, -4.3787414666,-1.0509236861,0.1653555162  
 C, -2.8630268247,0.9826524335,-2.7401389106  
 C, -4.0645471897,1.3703918476,-2.1660283535  
 H, -2.4189926308,1.5477092848,-3.5512683174  
 H, -4.5458372349,2.2627261287,-2.5514722766  
 O, 1.4875990652,0.0779486195,1.2984298956  
 H, 1.1394185725,-0.8390069109,1.0623758054  
 O, -1.0004785027,-0.4753890882,-2.8108117899  
 H, -0.6901102524,-1.2972381404,-2.3469865563  
 C, -5.9502203073,1.1752399992,-0.4450922938  
 C, -7.0598140051,1.3450150804,-1.5062768973  
 H, -7.977202384,1.7166118348,-1.0395851086  
 H, -6.7764296652,2.0549536939,-2.28756864  
 H, -7.2876185605,0.3904546478,-1.9886702846  
 C, -6.4602283291,0.2150207415,0.645797696  
 H, -7.3738708373,0.6190656297,1.09073663  
 H, -6.7015185013,-0.7696182263,0.234674823  
 H, -5.7278887671,0.0832614371,1.445923043  
 C, -5.6556781688,2.5407085437,0.2203596529  
 H, -4.8746877306,2.4322428985,0.9774429004  
 H, -5.3237701909,3.2831559817,-0.5108084789  
 H, -6.5548178301,2.9309250745,0.7076526397  
 C, 6.6257312164,1.0729490447,-1.0523038257  
 C, 7.6451104575,1.3283038564,0.0821966423  
 H, 7.7453995268,0.448649548,0.7236736247  
 H, 8.6289519988,1.557073135,-0.3377955584  
 H, 7.3496009631,2.1702229983,0.7126388108  
 C, 7.1496824776,-0.0852508104,-1.9203347744  
 H, 7.2805213616,-1.0031903611,-1.3405913654  
 H, 6.4833425321,-0.2992536923,-2.7605927231  
 H, 8.1250740702,0.1808215683,-2.3351302019  
 C, 6.5197486745,2.3335200105,-1.9419452765  
 H, 6.1956644814,3.2081398962,-1.3732486175  
 H, 7.492793,2.5672760293,-2.3835773115  
 H, 5.8055682072,2.1793830314,-2.7552003248  
 C, -2.0259385004,-0.2389226393,2.1059542771  
 O, -0.8760258007,-0.6301813163,1.7607686346  
 O, -3.035034657,-0.842609263,2.396822707

|                                            |                             |
|--------------------------------------------|-----------------------------|
| Zero-point correction=                     | 0.628389 (Hartree/Particle) |
| Thermal correction to Energy=              | 0.667644                    |
| Thermal correction to Enthalpy=            | 0.668589                    |
| Thermal correction to Gibbs Free Energy=   | 0.553847                    |
| Sum of electronic and zero-point Energies= | -2187.290597                |
| Sum of electronic and thermal Energies=    | -2187.251342                |

Sum of electronic and thermal Enthalpies= -2187.250397

Sum of electronic and thermal Free Energies= -2187.365139

**TSJ'-K'**

C, -0.6681168856,1.4588390027,0.7827845776  
C, 0.1835610641,1.6841628898,-0.4583262604  
H, -0.6227965511,0.4056226289,1.0633802088  
H, 0.9490022575,2.4386041165,-0.4439960296  
H, -0.2157562688,1.3848129216,-1.4115799036  
O, -2.0266560793,1.7398472305,0.5163816162  
C, -0.2407990181,2.317949016,1.9752978758  
H, -0.9316441751,2.1642107167,2.7995038591  
H, -0.2052965919,3.3678817308,1.6973854531  
Cl, 1.4182789644,1.8840611137,2.6081152405  
C, -0.6662443036,-5.6636889766,1.7945852207  
C, 0.69413337,-5.527434939,2.0681564252  
C, 1.3850528174,-4.415624094,1.6010064633  
C, 0.7221727917,-3.4439157921,0.8509635448  
C, -0.6633560332,-3.5532843811,0.5885396278  
C, -1.3352443544,-4.6882831408,1.065002125  
H, -1.2065811208,-6.5343157389,2.1470837369  
H, 1.2144924299,-6.2777982168,2.6504265962  
H, 2.4318149324,-4.2901185846,1.8500737121  
H, -2.3835003891,-4.8157318331,0.8235227196  
N, 1.3799593156,-2.2959731163,0.3569436836  
N, -1.26495016,-2.5626667657,-0.1912146321  
C, 2.6650197172,-2.1550358937,0.0998035869  
H, 3.2912634233,-3.026952945,0.2610011874  
C, -2.486178029,-2.1802257404,0.0400910695  
H, -3.0287738723,-2.562235023,0.9121522813  
C, 3.2716012118,-0.9815568112,-0.3903328811  
C, 4.6671086679,-1.0248921077,-0.6750696348  
C, 2.519889221,0.2275767155,-0.6241515206  
C, 5.351315551,0.0516131256,-1.187095485  
H, 5.1817097407,-1.9568468915,-0.473600584  
C, 3.2367099614,1.3218233771,-1.1691328626  
C, 4.5841564,1.2234705683,-1.4306649485  
H, 2.7186638369,2.2428126605,-1.3938982844  
H, 5.0764007364,2.0944600659,-1.8487778191  
C, -3.1869529204,-1.238021459,-0.7815447466  
C, -4.4731138736,-0.801472537,-0.3851922847  
C, -2.6105696857,-0.7020144311,-1.960631493  
C, -5.1934701645,0.136445673,-1.1003162547  
H, -4.872544959,-1.2139448067,0.5328219259  
C, -3.3420743854,0.2218487098,-2.7081520955

C, -4.5904391525,0.631014079,-2.2778151624  
 H, -2.8954725134,0.6329159982,-3.6050481853  
 H, -5.1085918075,1.379499231,-2.8643253207  
 O, 1.2524376836,0.2383891856,-0.3328440406  
 O, -1.3759798343,-1.0391048692,-2.377082699  
 H, -1.0112421913,-1.682893307,-1.727430923  
 C, -6.5688884017,0.6646311901,-0.6635186726  
 C, -6.9862431343,0.1128228444,0.7114508478  
 H, -7.9621593828,0.5204840488,0.9874064436  
 H, -7.0772223155,-0.9778485394,0.7082241838  
 H, -6.2756823108,0.4005648237,1.4910762699  
 C, -6.5191480342,2.2078959654,-0.5701019304  
 H, -7.4635375919,2.5866505968,-0.1663102817  
 H, -5.6927979402,2.5418300763,0.0594255954  
 H, -6.3719148158,2.6682161311,-1.5496683572  
 C, -7.6327463545,0.2404695315,-1.7022257962  
 H, -7.3967649435,0.624208605,-2.6980542868  
 H, -7.705275785,-0.849115449,-1.7711795961  
 H, -8.6158174441,0.6305953054,-1.4205333242  
 C, 6.8538555388,0.0401766133,-1.5056802709  
 C, 7.562387399,1.1413918355,-0.6829890888  
 H, 7.4369551625,0.9705773448,0.3894898991  
 H, 8.6337299261,1.1486086954,-0.9039544032  
 H, 7.172319737,2.1363595257,-0.9102688585  
 C, 7.5049281678,-1.311707574,-1.1633260133  
 H, 7.4123269011,-1.5500394264,-0.0999043723  
 H, 7.0691989115,-2.1315504137,-1.7414896368  
 H, 8.5714024619,-1.276263655,-1.3991799334  
 C, 7.0623249699,0.3106073965,-3.0140071888  
 H, 6.654826081,1.27846913,-3.3158689079  
 H, 8.1295476827,0.3123051717,-3.2540013912  
 H, 6.5783615191,-0.4599124439,-3.6200945426  
 C, -2.1919527588,2.9268098958,-0.3043579845  
 O, -3.3321318714,3.3100238088,-0.4446366561  
 O, -1.0835261129,3.3506059357,-0.7444699403  
 H, 0.8058478248,-1.4768513557,0.1272731576

|                                              |                             |
|----------------------------------------------|-----------------------------|
| Zero-point correction=                       | 0.631681 (Hartree/Particle) |
| Thermal correction to Energy=                | 0.670665                    |
| Thermal correction to Enthalpy=              | 0.671609                    |
| Thermal correction to Gibbs Free Energy=     | 0.557560                    |
| Sum of electronic and zero-point Energies=   | -2187.326358                |
| Sum of electronic and thermal Energies=      | -2187.287374                |
| Sum of electronic and thermal Enthalpies=    | -2187.286430                |
| Sum of electronic and thermal Free Energies= | -2187.400478                |

**TSI-L**

C, 1.8466209258,2.8041421349,-1.03281731  
C, 2.989291721,1.8804682835,-1.4520176403  
H, 2.1972059426,3.4298043951,-0.2008678812  
H, 3.8827430617,2.435613774,-1.7494057602  
H, 2.6587924189,1.2349989577,-2.2716316192  
O, 0.726217706,2.03083824,-0.6576381066  
C, 1.3487419189,3.7042791534,-2.1569630461  
H, 0.5148788233,4.3025595424,-1.8009673742  
H, 1.0409163539,3.1210053246,-3.0231587972  
Cl, 2.6231329082,4.8710504339,-2.7256309411  
C, -0.8140029197,1.3849114277,5.1577217202  
C, 0.5514734982,1.1344933423,5.2494062861  
C, 1.2688443788,0.7927435142,4.106612927  
C, 0.6433089205,0.7044268986,2.8566351973  
C, -0.7426121665,0.9706555946,2.7621324187  
C, -1.4522507528,1.2980672361,3.9235171432  
H, -1.3816472627,1.6618854502,6.0385629667  
H, 1.0627038997,1.2182583823,6.2013984703  
H, 2.3385317446,0.6275762715,4.1644421247  
H, -2.5094827007,1.5211636726,3.8377310016  
N, 1.3679155967,0.3842760292,1.6923897595  
N, -1.3788820916,0.9380116358,1.5095369891  
C, 2.1552360613,-0.6263644528,1.7195234888  
H, 2.1620260713,-1.2829396823,2.5997069699  
C, -2.3769741452,0.1574790611,1.3437856222  
H, -2.6711814727,-0.5392849916,2.1413611394  
C, 3.0446047609,-1.0681939071,0.6409479982  
C, 3.4294506649,-2.4204003253,0.6382147996  
C, 3.5251985614,-0.228442737,-0.3837566279  
C, 4.209658073,-2.9864214227,-0.3677574549  
H, 3.0692992451,-3.0362399872,1.4532985881  
C, 4.3055471568,-0.7755905834,-1.4038155664  
C, 4.6273494873,-2.1268746995,-1.3953992583  
H, 4.6838792025,-0.1357362952,-2.1916880616  
H, 5.2395526365,-2.5088907108,-2.2043340139  
C, -3.2115737785,0.0803127501,0.1449209625  
C, -4.1556496982,-0.9562536872,0.0885025819  
C, -3.1486659892,0.9876065015,-0.9380816921  
C, -5.0392362096,-1.1375172261,-0.9774012918  
H, -4.1848952249,-1.6414324679,0.9296544767  
C, -4.0282226661,0.8269120911,-2.0059900073  
C, -4.9534371856,-0.2118948221,-2.0246011782  
H, -3.9712438581,1.5332673076,-2.8252374755

H, -5.6119988123,-0.2910341539,-2.879549934  
 O, 3.2648205355,1.0943762833,-0.2839638492  
 H, 0.964246903,1.4763088876,0.11584674  
 O, -2.2795960908,2.0253739783,-0.9778096525  
 H, -1.4190348527,2.5378532873,-0.1434693479  
 C, -6.0429179506,-2.3040772381,-0.9642707555  
 C, -6.9676951793,-2.1779797331,0.2684092464  
 H, -7.6834372292,-3.0053616981,0.2931415007  
 H, -6.4035357662,-2.1990122238,1.2038147044  
 H, -7.530868701,-1.241390789,0.2387175496  
 C, -6.9253884411,-2.3232451857,-2.2257279433  
 H, -7.6203661826,-3.1653925663,-2.1738409117  
 H, -7.5198916788,-1.4104782268,-2.3198096678  
 H, -6.3317766986,-2.4418103129,-3.1363034718  
 C, -5.2748264372,-3.6444983984,-0.8936971489  
 H, -4.6124124811,-3.7605432986,-1.755743516  
 H, -4.6631651462,-3.7149695684,0.0088518798  
 H, -5.9758883364,-4.4848226722,-0.8869921583  
 C, 4.618382895,-4.4696609621,-0.3845459149  
 C, 6.1606806512,-4.5778760835,-0.3605134888  
 H, 6.5700796905,-4.1139326575,0.5409131107  
 H, 6.468857613,-5.6277565176,-0.3729120699  
 H, 6.6160218473,-4.0880437225,-1.2243269453  
 C, 4.065457355,-5.2397730194,0.8283237626  
 H, 4.4360615461,-4.8317736175,1.7728386573  
 H, 2.9723211568,-5.2293942744,0.8539530251  
 H, 4.3831605236,-6.2842918976,0.7749740222  
 C, 4.0769029488,-5.139573402,-1.6687064777  
 H, 4.4729174768,-4.668150213,-2.5712456427  
 H, 4.3596434835,-6.1963566741,-1.6946404113  
 H, 2.9861206111,-5.0780666266,-1.7106767193  
 C, -2.6501615063,3.6767050964,-0.4727414922  
 O, -3.63906731,4.1903919323,-0.8147798121  
 O, -1.5788907246,3.7229918801,0.1512718144

|                                              |                             |
|----------------------------------------------|-----------------------------|
| Zero-point correction=                       | 0.625514 (Hartree/Particle) |
| Thermal correction to Energy=                | 0.665402                    |
| Thermal correction to Enthalpy=              | 0.666346                    |
| Thermal correction to Gibbs Free Energy=     | 0.548918                    |
| Sum of electronic and zero-point Energies=   | -2187.308568                |
| Sum of electronic and thermal Energies=      | -2187.268680                |
| Sum of electronic and thermal Enthalpies=    | -2187.267735                |
| Sum of electronic and thermal Free Energies= | -2187.385163                |

**TSL-M**

C, 1.8439509339,3.2267231542,-0.5577575338

C, 2.7713084433,2.2484203756,-1.2776433895  
H, 2.3971728151,3.6154974063,0.3057350285  
H, 3.6716513308,2.7285637808,-1.6662819619  
H, 2.2241805984,1.7255186713,-2.0614984241  
O, 0.7420287671,2.5202699747,-0.0248150423  
C, 1.4233115928,4.4353678741,-1.3994591368  
H, 0.6348315867,4.9767135176,-0.8837654015  
H, 1.0983412813,4.1697342539,-2.397483204  
Cl, 2.8262029896,5.6020657062,-1.5789749185  
C, -0.6612783876,1.954992168,5.4674843576  
C, 0.724940735,1.8250563532,5.4776707372  
C, 1.3931551231,1.4548058917,4.3119433935  
C, 0.6712530876,1.2167596071,3.1466363354  
C, -0.7351713257,1.3299522417,3.129997224  
C, -1.3889377879,1.7081861579,4.3048393277  
H, -1.1831893076,2.2516650702,6.3699841185  
H, 1.2881435187,2.0261946816,6.380642468  
H, 2.4744932707,1.3794308049,4.2941115758  
H, -2.4674952583,1.8108424541,4.2923106119  
N, 1.3308456708,0.8437576301,1.928013794  
N, -1.3668232613,1.088149443,1.9086532164  
C, 2.0228345335,-0.2504009381,1.8435821832  
H, 2.0153214035,-0.87921619,2.7329130771  
C, -2.0210216359,0.0119226656,1.6817918014  
H, -2.2542677939,-0.6832068102,2.502086889  
C, 2.7175718921,-0.7840591562,0.699491976  
C, 2.9013776792,-2.1841998938,0.6618132712  
C, 3.1495091368,0.0012260621,-0.3942726468  
C, 3.4013599922,-2.8357443268,-0.4564153512  
H, 2.5941753344,-2.7528039536,1.5307654069  
C, 3.6407029226,-0.6420936564,-1.532084298  
C, 3.7474201602,-2.0242619178,-1.5553776029  
H, 3.957778821,-0.0543046999,-2.3841224717  
H, 4.1371799582,-2.4861546263,-2.4551796328  
C, -2.4236819686,-0.3990680813,0.3415888034  
C, -3.5616532923,-1.2122114074,0.1832727001  
C, -1.6220705321,-0.0778970556,-0.782505127  
C, -3.9904999536,-1.6560535081,-1.0621355194  
H, -4.1217953563,-1.4688225083,1.0750528575  
C, -2.0446797452,-0.5369282726,-2.037904293  
C, -3.2015474518,-1.2868806089,-2.1696159157  
H, -1.4405325426,-0.2751306266,-2.8975314839  
H, -3.4941520632,-1.6060548904,-3.1640201045  
O, 3.1487620434,1.3260681813,-0.2201473016



H, 1.1278884472,1.4805424262,1.0587556615  
 O, -0.4529274628,0.5718558275,-0.6437205267  
 H, -1.5548753792,2.4092547962,0.3701307362  
 C, -5.2539645004,-2.5089284447,-1.2672619319  
 C, -5.9720199632,-2.8164997884,0.059373317  
 H, -6.8611660664,-3.4222837845,-0.1352516617  
 H, -5.3335844542,-3.379693752,0.7460906318  
 H, -6.2998544582,-1.9040827236,0.5650632263  
 C, -6.2418116235,-1.7505309464,-2.1841229361  
 H, -7.1485612966,-2.3430997805,-2.3415399505  
 H, -6.5312435267,-0.7954496118,-1.7378231127  
 H, -5.8062571063,-1.5409353394,-3.1637150466  
 C, -4.8705922472,-3.8530786209,-1.9287371133  
 H, -4.3970176679,-3.7059041921,-2.9021785205  
 H, -4.172491256,-4.4117020724,-1.2989968677  
 H, -5.7612143996,-4.4706240223,-2.0817526828  
 C, 3.5752707066,-4.361420775,-0.5411591776  
 C, 5.060141433,-4.6960614437,-0.8150337221  
 H, 5.700513786,-4.3206024452,-0.0122655558  
 H, 5.197639017,-5.7793248481,-0.8810664797  
 H, 5.4102146125,-4.2611403671,-1.754108057  
 C, 3.156550706,-5.0660975628,0.7614979874  
 H, 3.7546724337,-4.7341968083,1.6150042333  
 H, 2.1005609971,-4.9013194128,0.9927017618  
 H, 3.303819617,-6.1439702959,0.6581026441  
 C, 2.7022592662,-4.9123697177,-1.6924717245  
 H, 2.9820012485,-4.4827875719,-2.6572806138  
 H, 2.8158467958,-5.9978722839,-1.7675119051  
 H, 1.6455000239,-4.6905202376,-1.5226328125  
 C, -0.4396202347,2.0788275144,-1.114071068  
 O, -0.1370719297,2.2493244014,-2.2799107251  
 O, -1.5478492762,2.6645551941,-0.569778711

|                                              |                             |
|----------------------------------------------|-----------------------------|
| Zero-point correction=                       | 0.630627 (Hartree/Particle) |
| Thermal correction to Energy=                | 0.668567                    |
| Thermal correction to Enthalpy=              | 0.669511                    |
| Thermal correction to Gibbs Free Energy=     | 0.560310                    |
| Sum of electronic and zero-point Energies=   | -2187.298854                |
| Sum of electronic and thermal Energies=      | -2187.260914                |
| Sum of electronic and thermal Enthalpies=    | -2187.259970                |
| Sum of electronic and thermal Free Energies= | -2187.369171                |

**TSN-K**

C, 1.0033242938,4.0052561698,-0.5036608672  
 C, 1.3362069328,2.6134149331,-0.8621613646  
 H, 1.9024478054,4.6254481844,-0.6244837349

H, 1.7056821711,2.4417464749,-1.8641776316  
H, 0.8826834661,1.7764834848,-0.3453869602  
O, 0.443392659,4.1288742809,0.7717369272  
C, -1.0645785176,-0.4290761188,4.4912930115  
C, 0.3197718136,-0.4650495544,4.6307959444  
C, 1.1339371339,-0.3322126508,3.5110875904  
C, 0.5821971182,-0.1557410093,2.2372805822  
C, -0.8230412047,-0.1022128117,2.0990864371  
C, -1.6292187526,-0.2488692737,3.2327586139  
H, -1.705034867,-0.5114518871,5.3615102625  
H, 0.7682119944,-0.5710169404,5.6114866486  
H, 2.2115593014,-0.3095557784,3.6191080793  
H, -2.7047070395,-0.1708968775,3.123331559  
N, 1.389017311,0.0007023179,1.0959760467  
N, -1.3742655003,0.1331538198,0.827091283  
C, 2.3434127755,-0.8237735463,0.8947139713  
H, 2.4707141607,-1.7035022246,1.5395778403  
C, -2.3509394952,-0.574760395,0.3786772099  
H, -2.7295683736,-1.4341767836,0.9439871685  
C, 3.2904131437,-0.7386929385,-0.2243220338  
C, 3.8346451824,-1.9508549115,-0.6868639117  
C, 3.6767080945,0.4521961441,-0.8700260792  
C, 4.6726773041,-2.0414936989,-1.7951483251  
H, 3.5521956257,-2.8481100033,-0.1505885311  
C, 4.5116683811,0.3810424342,-1.9882684325  
C, 4.9879967954,-0.8363881805,-2.4454779164  
H, 4.7999923478,1.3092049039,-2.4671126235  
H, 5.6371335513,-0.8411059302,-3.3131955417  
C, -2.9901293385,-0.2914089761,-0.8933103585  
C, -4.0193803413,-1.1296963588,-1.3631190879  
C, -2.5880393082,0.8139489172,-1.6785498983  
C, -4.664093424,-0.9153528713,-2.5746499929  
H, -4.3010665575,-1.965598316,-0.7341438747  
C, -3.2251090973,1.0415640872,-2.9006663068  
C, -4.232643697,0.1933454553,-3.3302899729  
H, -2.9141497256,1.8890019351,-3.499794294  
H, -4.7019879567,0.4051262186,-4.2842140074  
O, 3.328504354,1.7079913074,-0.4748893108  
H, 3.0111011391,1.8364071141,0.4593182981  
O, -1.62152286,1.6573152748,-1.2661367313  
H, -1.3211927738,1.3268675018,-0.3718457278  
C, -5.7967988819,-1.813115622,-3.1009195995  
C, -7.0796749909,-0.9689651102,-3.2840374631  
H, -7.8951144193,-1.5925061166,-3.6632080083

H, -7.3988457894,-0.5324160876,-2.3337875213  
 H, -6.9303529553,-0.1512761228,-3.9931508604  
 C, -5.3859286078,-2.4211115474,-4.4619921893  
 H, -6.1845282819,-3.0608461134,-4.849829467  
 H, -5.1877290784,-1.6490613398,-5.2091746045  
 H, -4.4821830775,-3.0280971728,-4.36087416  
 C, -6.1171490324,-2.9691156781,-2.1362043509  
 H, -5.2562695982,-3.6275623158,-1.9899021182  
 H, -6.4419236708,-2.6042907953,-1.1578235185  
 H, -6.9287393519,-3.5757635932,-2.5461567056  
 C, 5.2470874541,-3.3720995274,-2.3089677577  
 C, 6.7918684994,-3.3170032533,-2.2557528153  
 H, 7.1420439666,-3.1575287432,-1.2324402346  
 H, 7.2166377653,-4.2576944407,-2.6185573001  
 H, 7.191372348,-2.5107670372,-2.8751722405  
 C, 4.7789901328,-4.573270288,-1.4677987439  
 H, 5.0979109717,-4.4900397252,-0.4251361111  
 H, 3.6914662908,-4.6854350424,-1.4878699097  
 H, 5.2114208296,-5.4929056515,-1.8702469076  
 C, 4.7919937234,-3.5981832614,-3.7695336388  
 H, 5.1316432421,-2.7971725726,-4.4302170267  
 H, 5.1994275864,-4.5390225804,-4.1514352615  
 H, 3.7018584082,-3.6477049518,-3.8362420363  
 C, 1.2419607762,3.538040164,1.8206860206  
 O, 0.8600110985,3.7220511197,2.9456792919  
 O, 2.2449248809,2.9136974681,1.3517538029  
 C, -0.0777364431,4.5521618736,-1.4754461192  
 H, -0.9263218935,3.8784544898,-1.5448792066  
 H, -0.3820418963,5.5256470399,-1.1023185479  
 Cl, 0.5721567891,4.7951591723,-3.1505912485

|                                              |                             |
|----------------------------------------------|-----------------------------|
| Zero-point correction=                       | 0.627386 (Hartree/Particle) |
| Thermal correction to Energy=                | 0.666760                    |
| Thermal correction to Enthalpy=              | 0.667704                    |
| Thermal correction to Gibbs Free Energy=     | 0.551336                    |
| Sum of electronic and zero-point Energies=   | -2187.282127                |
| Sum of electronic and thermal Energies=      | -2187.242753                |
| Sum of electronic and thermal Enthalpies=    | -2187.241809                |
| Sum of electronic and thermal Free Energies= | -2187.358177                |

#### TSG<sup>-</sup>H<sup>+</sup>

C, 0.2016867243,-2.1561485708,0.5436384492  
 C, -0.9610294919,-2.1597979926,-0.3285624066  
 H, 0.3696405922,-1.2256318819,1.0878114368  
 H, -1.2040425302,-1.2312594498,-0.8116225596  
 H, -1.2993783342,-3.0967399933,-0.7368144088

O, 0.8358569107,-2.2699233397,-0.7070385921  
C, 0.5302654425,-3.3851903203,1.3697813345  
H, 1.612844798,-3.4769271319,1.4432186774  
H, 0.1131731826,-4.2873823244,0.9272482386  
Cl, -0.0869881262,-3.3187349742,3.0911231528  
C, 0.4920338449,4.1215929573,2.063130099  
C, -0.8208401714,3.8844245913,2.4554467533  
C, -1.4879124503,2.761058069,1.9770002138  
C, -0.8770588574,1.8394121169,1.106739617  
C, 0.4873554657,2.0494492065,0.7569034539  
C, 1.1268182943,3.2102435811,1.2237433578  
H, 1.0203902877,5.007783048,2.3987044318  
H, -1.3306444625,4.5711626595,3.1234714425  
H, -2.5022545313,2.5564093886,2.2993803794  
H, 2.132920184,3.4179697943,0.8780992215  
N, -1.5724667369,0.7122120476,0.6705114081  
N, 1.1403304929,1.1765556358,-0.1330702876  
C, -2.7716878939,0.8828684031,0.2296686882  
H, -3.1282899838,1.9141553973,0.0701154809  
C, 2.3892501842,0.958514348,0.0486311527  
H, 2.8844744959,1.3327816343,0.958704724  
C, -3.7760869629,-0.1107197548,-0.0936039894  
C, -4.9631457539,0.4005510953,-0.6742563652  
C, -3.6931478264,-1.517083858,0.2361585403  
C, -6.0829265245,-0.3613592976,-0.9606921759  
H, -4.9690016768,1.4633434579,-0.8928798156  
C, -4.8797773736,-2.2768718777,-0.0402031438  
C, -6.0053851857,-1.7319655011,-0.6096843343  
H, -4.8409408088,-3.3287674246,0.2234557213  
H, -6.8562888917,-2.3826590999,-0.7950298748  
C, 3.3285978688,0.3439477638,-0.8937713226  
C, 4.6905882285,0.5681171771,-0.6267285745  
C, 2.9741266824,-0.3156676705,-2.1034646218  
C, 5.7206726013,0.2429469277,-1.509351163  
H, 4.9298772982,1.0554983803,0.3142134079  
C, 4.003146523,-0.6081697333,-3.0101729462  
C, 5.3344447953,-0.3342587973,-2.7274588361  
H, 3.7193718912,-1.0913646081,-3.9381405171  
H, 6.0788392512,-0.6011002624,-3.4677611515  
O, -2.6784986848,-2.0999858342,0.7532644428  
O, 1.7314022402,-0.65971865,-2.4263700318  
H, 1.2737276212,-1.1297916319,-1.6425818949  
C, 7.186009393,0.5339535113,-1.1373194792  
C, 7.5565704688,-0.2264784497,0.1570055191

H, 8.5952984176,-0.0233671157,0.440800395  
 H, 6.9172369464,0.0667261588,0.9926752153  
 H, 7.4438670684,-1.3050475405,0.0172243146  
 C, 8.1648905831,0.0946506795,-2.2422112766  
 H, 9.1919522236,0.3118799258,-1.9332372935  
 H, 8.0966923603,-0.9788049769,-2.4390770571  
 H, 7.9812799757,0.6254186397,-3.1805181489  
 C, 7.3778298527,2.0510588272,-0.9074065395  
 H, 7.1320736243,2.6132849173,-1.8125971611  
 H, 6.73637986,2.4197704594,-0.10378391  
 H, 8.4162893326,2.272907287,-0.6366472962  
 C, -7.3582264439,0.1988988359,-1.6102836288  
 C, -8.5700224364,-0.0231482377,-0.6745321056  
 H, -8.4193823333,0.4916649971,0.2784055646  
 H, -9.4899949252,0.3602655381,-1.1315287062  
 H, -8.7208920561,-1.0833461739,-0.4576159125  
 C, -7.2547043559,1.7074851132,-1.8989873971  
 H, -7.1004271671,2.2837246678,-0.9825645414  
 H, -6.4315177287,1.9317736998,-2.582635564  
 H, -8.1808282305,2.0609884444,-2.3636788887  
 C, -7.6212208564,-0.5246306206,-2.9525151676  
 H, -7.7331637026,-1.60226674,-2.8104294436  
 H, -8.5372535548,-0.149804255,-3.4242078621  
 H, -6.7890306878,-0.3664825127,-3.6439552712

|                                              |                             |
|----------------------------------------------|-----------------------------|
| Zero-point correction=                       | 0.598678 (Hartree/Particle) |
| Thermal correction to Energy=                | 0.635468                    |
| Thermal correction to Enthalpy=              | 0.636413                    |
| Thermal correction to Gibbs Free Energy=     | 0.526783                    |
| Sum of electronic and zero-point Energies=   | -1998.164461                |
| Sum of electronic and thermal Energies=      | -1998.127671                |
| Sum of electronic and thermal Enthalpies=    | -1998.126726                |
| Sum of electronic and thermal Free Energies= | -1998.236356                |

#### TSI-J

C, -0.5580314161,-2.6196743799,-1.1659482726  
 C, -1.2328201594,-1.2382533069,-1.1946382636  
 H, -1.1180150984,-3.2505271619,-0.467139089  
 H, -1.2889077177,-0.8268507818,-2.2089835139  
 H, -0.6692122745,-0.5720813332,-0.5479732634  
 O, 0.7758345852,-2.518678258,-0.7522425459  
 C, -0.4972902814,-3.3160580406,-2.5287431199  
 H, -0.0721281471,-4.3088273018,-2.4135162698  
 H, 0.0865994727,-2.7270878151,-3.2336223685  
 Cl, -2.1413433202,-3.5782791327,-3.3398095398  
 C, 1.1214354109,-1.353637698,4.9216656424

C, -0.2528213759,-1.226194989,5.1107773102  
C, -1.062486712,-0.846901385,4.043610051  
C, -0.5149943228,-0.5819368805,2.7813045211  
C, 0.8915754466,-0.6606538976,2.5969756617  
C, 1.6830557293,-1.0769317315,3.6785651289  
H, 1.7550618284,-1.6957986512,5.733141052  
H, -0.6991073701,-1.4582263522,6.0719367523  
H, -2.1403322303,-0.8143040104,4.1586258872  
H, 2.7421923625,-1.233528087,3.5156204732  
N, -1.3138076895,-0.347626927,1.6659045012  
N, 1.4054519994,-0.3567992109,1.3377716716  
C, -2.287214623,0.4697395104,1.6685744235  
H, -2.4832374804,1.1254550684,2.5326810487  
C, 2.5443153766,0.2171635279,1.2437849092  
H, 3.0683912701,0.5540164208,2.1528411823  
C, -3.220815467,0.6394929269,0.5473438644  
C, -4.112984768,1.7254188364,0.6220987534  
C, -3.3229220697,-0.2443504247,-0.5536780664  
C, -5.0842973808,1.9894931759,-0.3403750009  
H, -4.0181211918,2.3734784554,1.4855127997  
C, -4.3038214332,0.0068808159,-1.5183422046  
C, -5.1603847126,1.0937735841,-1.418410989  
H, -4.3774377529,-0.6900114868,-2.3450618094  
H, -5.9010225392,1.2402722561,-2.1975995622  
C, 3.2544789506,0.5548827814,0.0175318312  
C, 4.4166761861,1.3333973181,0.1850531449  
C, 2.8400997065,0.2159196019,-1.3083271574  
C, 5.1879755037,1.8318634239,-0.8597809269  
H, 4.7030984577,1.5562623288,1.2092076368  
C, 3.612407944,0.7474597513,-2.365019641  
C, 4.7389651907,1.5225144782,-2.1549636277  
H, 3.2873025993,0.503792919,-3.3701358527  
H, 5.2802517899,1.8800580256,-3.0229166199  
O, -2.5882442739,-1.3764333158,-0.6831508327  
O, 1.7975486706,-0.507253782,-1.6470634603  
H, 1.4243007678,-1.3469356822,-1.0711121852  
C, 6.4451388274,2.6732452436,-0.5751312253  
C, 6.0606221596,3.9420446432,0.2213487986  
H, 6.9480905777,4.547891841,0.4374508601  
H, 5.3561866668,4.5561290754,-0.3466120607  
H, 5.5872027686,3.6897943877,1.1730746388  
C, 7.4549840469,1.8438345613,0.2519339259  
H, 8.3556843113,2.4305885029,0.4664990199  
H, 7.0269427756,1.5253154634,1.2052028701

H, 7.7532796272,0.9441368267,-0.2930840367  
 C, 7.147891178,3.1217234088,-1.8697726511  
 H, 7.4751146063,2.2670510058,-2.4682680813  
 H, 6.4943694121,3.741036806,-2.4905495026  
 H, 8.0341016636,3.7151598669,-1.6241254001  
 C, -6.0519493784,3.1829427566,-0.2550027938  
 C, -5.8110003528,4.0440565075,0.998391583  
 H, -4.801472181,4.4634298715,1.0137258161  
 H, -6.5176293661,4.8792602167,1.0137016242  
 H, -5.9559454935,3.4709850714,1.9182859528  
 C, -5.8719494207,4.0852985405,-1.4979084099  
 H, -4.8518486488,4.4752432289,-1.5494993053  
 H, -6.0655347791,3.5393302497,-2.42411009  
 H, -6.5621076295,4.9349638919,-1.4583376153  
 C, -7.5084911115,2.6654813221,-0.2082773897  
 H, -7.6645523752,2.026288373,0.6650430628  
 H, -8.2118876961,3.5031527133,-0.1502864285  
 H, -7.7571591938,2.080358649,-1.0966251282  
 C, 1.4455877125,-3.8379809127,0.351722017  
 O, 0.5951968986,-4.6712359871,0.4362972921  
 O, 2.5373635038,-3.4570081877,0.631205953

|                                              |                             |
|----------------------------------------------|-----------------------------|
| Zero-point correction=                       | 0.612806 (Hartree/Particle) |
| Thermal correction to Energy=                | 0.652385                    |
| Thermal correction to Enthalpy=              | 0.653329                    |
| Thermal correction to Gibbs Free Energy=     | 0.536817                    |
| Sum of electronic and zero-point Energies=   | -2186.840740                |
| Sum of electronic and thermal Energies=      | -2186.801162                |
| Sum of electronic and thermal Enthalpies=    | -2186.800218                |
| Sum of electronic and thermal Free Energies= | -2186.916730                |

#### TS2J--2K

C, 0.0121408026,2.9748292486,1.3313355616  
 C, 1.1083550147,3.0967102289,0.2997740919  
 H, -0.224660577,1.9275243511,1.4903224892  
 H, 2.0568553801,3.5331431002,0.5531082964  
 H, 0.8996052173,2.8381835637,-0.7216025131  
 O, -1.1664365452,3.600729605,0.8245417116  
 C, 0.3273994434,3.6803421517,2.6524683398  
 H, -0.5433386803,3.6315192445,3.301143061  
 H, 0.6090433522,4.715105853,2.4727696968  
 Cl, 1.70318097,2.9268623392,3.5857865828  
 C, -0.444357746,-4.9414265743,2.8552432547  
 C, 0.9310382343,-4.7256954141,2.9429090355  
 C, 1.504541176,-3.6159567448,2.3326563601  
 C, 0.7273035084,-2.6939201946,1.60767674

C, -0.6762204889,-2.9203822365,1.5219901518  
C, -1.2366455715,-4.0380619616,2.1552202574  
H, -0.9003577719,-5.7903874095,3.3529149809  
H, 1.5546756713,-5.4099266209,3.5090379175  
H, 2.5650261812,-3.422249886,2.4443330207  
H, -2.3115344052,-4.1792113097,2.126974851  
N, 1.2542373457,-1.5460079216,1.0332669084  
N, -1.4197620475,-1.9528227341,0.847879167  
C, 2.3678891131,-1.6157563647,0.3927486876  
H, 2.8211918537,-2.6074154372,0.2251097948  
C, -2.5915260664,-2.1315805257,0.3496332325  
H, -3.0848477869,-3.1133780514,0.3443726246  
C, 3.1329178539,-0.5435811521,-0.2054502632  
C, 4.2812814809,-0.9503703906,-0.9226378418  
C, 2.7939621112,0.8594130807,-0.1304990422  
C, 5.1244227734,-0.0847087389,-1.5994889483  
H, 4.486808277,-2.0155818917,-0.9315782104  
C, 3.6669152132,1.734899005,-0.8541193294  
C, 4.7687512092,1.2808464783,-1.544954069  
H, 3.4546556806,2.7954771547,-0.8530432605  
H, 5.3802115752,2.0159723885,-2.0609901008  
C, -3.3314066361,-1.0267062595,-0.2276310827  
C, -4.6509320547,-1.2220101753,-0.6838908105  
C, -2.7545331432,0.2684207894,-0.3101438966  
C, -5.4268666744,-0.1909615121,-1.1938226617  
H, -5.0516619396,-2.2269397483,-0.6110737125  
C, -3.5378782566,1.3236427258,-0.8045240577  
C, -4.8315113044,1.0898411412,-1.2310791333  
H, -3.1047124869,2.3172231188,-0.817765041  
H, -5.400326337,1.9353626194,-1.6026688928  
O, 1.7800125019,1.2767667751,0.5408482138  
O, -1.5007195968,0.5252412325,0.0561251189  
H, -1.0916642235,-0.3085972956,0.4164575444  
C, -6.8692939275,-0.3824899616,-1.6920516428  
C, -7.3377490072,-1.8445150894,-1.575997272  
H, -8.3643778526,-1.9341975189,-1.9434612721  
H, -6.7128341134,-2.5178038254,-2.1693941875  
H, -7.3260864363,-2.1925129293,-0.5392835746  
C, -7.8299493132,0.4952391411,-0.8561493161  
H, -8.8615908015,0.3776796852,-1.2057327769  
H, -7.7918807237,0.2130514269,0.1996155383  
H, -7.5720774662,1.5543408206,-0.9254213344  
C, -6.9654244126,0.0329729299,-3.1786694413  
H, -6.6783832632,1.0766757863,-3.3254275964



|                                              |                             |
|----------------------------------------------|-----------------------------|
| H, -6.3051819279,-0.5824099603,-3.7960308963 |                             |
| H, -7.9901615283,-0.0876476629,-3.5466980623 |                             |
| C, 6.3717615067,-0.534293633,-2.3764535689   |                             |
| C, 7.6299888125,0.1461716635,-1.7872893036   |                             |
| H, 7.7619488163,-0.1306283691,-0.7376766116  |                             |
| H, 8.5286623758,-0.1546289838,-2.3382763829  |                             |
| H, 7.5568224503,1.2352480397,-1.835769485    |                             |
| C, 6.582651858,-2.0579010993,-2.3104294022   |                             |
| H, 6.7159637226,-2.4023436307,-1.2811057888  |                             |
| H, 5.7386252518,-2.6013714529,-2.7439078556  |                             |
| H, 7.4804128473,-2.3333126869,-2.8728358686  |                             |
| C, 6.2353258823,-0.1369911576,-3.8652752525  |                             |
| H, 6.1145126383,0.9424834028,-3.9837912497   |                             |
| H, 7.1241316536,-0.4391486635,-4.4312138844  |                             |
| H, 5.3623663189,-0.618670512,-4.3143457015   |                             |
| C, -0.8564499052,4.748649892,0.0466859388    |                             |
| O, -1.7887622566,5.4090879396,-0.358698473   |                             |
| O, 0.4054581405,4.8932422941,-0.1130966714   |                             |
| Zero-point correction=                       | 0.616295 (Hartree/Particle) |
| Thermal correction to Energy=                | 0.655326                    |
| Thermal correction to Enthalpy=              | 0.656270                    |
| Thermal correction to Gibbs Free Energy=     | 0.541260                    |
| Sum of electronic and zero-point Energies=   | -2186.817234                |
| Sum of electronic and thermal Energies=      | -2186.778204                |
| Sum of electronic and thermal Enthalpies=    | -2186.777260                |
| Sum of electronic and thermal Free Energies= | -2186.892270                |

**cis-G'**

C, -0.044361862,-3.3518248763,2.7502690869  
 C, -0.1725191847,-3.4029823192,1.2928784191  
 H, -0.3452593861,-2.4389066983,3.257092328  
 H, -0.5566473547,-2.5289239595,0.7712745459  
 H, -0.2847666985,-4.3698430718,0.8103194997  
 O, 1.128864285,-3.2146000494,1.9202063079  
 C, -0.0348634619,-4.5993076923,3.5879210344  
 H, 0.5783268917,-4.4779845431,4.4792277354  
 H, 0.3158481878,-5.452719327,3.0113805531  
 Cl, -1.7118967754,-4.9889952457,4.1691311212  
 C, 0.7387426765,5.5692243667,1.2677500431  
 C, -0.6417151951,5.6066329069,1.0858678605  
 C, -1.3300887339,4.4472897922,0.7428925662  
 C, -0.6463916621,3.2438769013,0.5534829923  
 C, 0.7591142954,3.1971918441,0.7253530568  
 C, 1.4265667907,4.3730685218,1.0971086375

H, 1.2754911246,6.4632564245,1.5632274049  
H, -1.1903222007,6.5282411943,1.2398427964  
H, -2.4090446419,4.4776889923,0.6559376307  
H, 2.4928672925,4.3273703226,1.2845965114  
N, -1.3046905293,2.0519946336,0.1947895237  
N, 1.385323299,1.9602650751,0.5931165017  
C, -2.5040367397,1.971085546,-0.3768709253  
H, -2.9690571605,2.9145770204,-0.6458681274  
C, 2.5419714246,1.8731056509,0.0505096795  
H, 3.011676414,2.7613574225,-0.398311617  
C, -3.1906467608,0.7936677312,-0.6658046109  
C, -4.4723764803,0.8854375936,-1.2982747905  
C, -2.6183950658,-0.5094125334,-0.3278377465  
C, -5.2242010555,-0.2147691115,-1.608350956  
H, -4.8369227123,1.881316596,-1.5249415681  
C, -3.4474322074,-1.6434091438,-0.6669660644  
C, -4.6627989148,-1.4927769093,-1.2669227575  
H, -3.0638839553,-2.628605277,-0.4274042806  
H, -5.2323547199,-2.3877013887,-1.4962605347  
C, 3.3380819549,0.6597446489,-0.0777347842  
C, 4.506400665,0.7382414295,-0.8539666359  
C, 3.0043254826,-0.5829237603,0.5178271576  
C, 5.3512996688,-0.3443782425,-1.0930284577  
H, 4.7411321544,1.7046224669,-1.2890094817  
C, 3.8385355837,-1.6802339981,0.2796350661  
C, 4.9785639469,-1.5615639279,-0.506583301  
H, 3.5819052857,-2.6352915575,0.7256576378  
H, 5.5854955284,-2.4457539483,-0.6528505185  
O, -1.4901069931,-0.6260484149,0.2118334683  
O, 1.9206135899,-0.6670740661,1.2999145404  
H, 1.7589717754,-1.5939005595,1.5709757767  
C, 6.6151208045,-0.1717226901,-1.9545431724  
C, 7.5478561473,0.8736731616,-1.2999434499  
H, 8.4538428276,1.0066333996,-1.8996111003  
H, 7.062932561,1.8486986216,-1.2099089691  
H, 7.8464947821,0.5559320368,-0.29725473  
C, 7.4009829701,-1.4877196451,-2.1010962081  
H, 8.2878878934,-1.3188204928,-2.7176931801  
H, 7.7394639677,-1.8690851852,-1.1338435235  
H, 6.8050513736,-2.2653069547,-2.586825343  
C, 6.2204057701,0.3116109738,-3.369095416  
H, 5.5634585395,-0.4121738379,-3.8588880131  
H, 5.6962597017,1.2697622969,-3.3388394491  
H, 7.1115306135,0.4395423358,-3.9917259027

C, -6.6025720666,-0.1514173086,-2.2826995042  
 C, -7.6610312262,-0.804482894,-1.3629266709  
 H, -7.7227500576,-0.277487976,-0.4069554788  
 H, -8.6482733993,-0.7733934923,-1.8345265844  
 H, -7.4284598692,-1.8509751704,-1.151789001  
 C, -7.0431004592,1.2957307348,-2.5656635909  
 H, -7.1245235226,1.8814233065,-1.645777575  
 H, -6.348702234,1.8064125075,-3.2386261208  
 H, -8.0259943754,1.2951013023,-3.044551114  
 C, -6.5568897262,-0.9117433514,-3.6289328929  
 H, -6.2839198722,-1.9612330708,-3.4950885483  
 H, -7.5363695925,-0.8832217619,-4.1166804936  
 H, -5.8256222893,-0.4606318739,-4.3050722676  
 H, -0.8350671269,1.1514125682,0.3733879749

|                                              |                             |
|----------------------------------------------|-----------------------------|
| Zero-point correction=                       | 0.615718 (Hartree/Particle) |
| Thermal correction to Energy=                | 0.653543                    |
| Thermal correction to Enthalpy=              | 0.654488                    |
| Thermal correction to Gibbs Free Energy=     | 0.539121                    |
| Sum of electronic and zero-point Energies=   | -1998.732711                |
| Sum of electronic and thermal Energies=      | -1998.694886                |
| Sum of electronic and thermal Enthalpies=    | -1998.693942                |
| Sum of electronic and thermal Free Energies= | -1998.809309                |

#### ***cis*-TSG'-H'**

C, 0.0635237989,-2.9594667606,2.8087967176  
 C, -0.9896426365,-2.0158568752,3.2098954663  
 H, 1.0547066095,-2.6731589589,3.1932264662  
 H, -0.7653270151,-1.1171582629,3.7620910432  
 H, -2.0140201787,-2.361104359,3.2305568399  
 O, -0.1165493545,-2.7266414353,1.4471254278  
 C, -0.2008587705,-4.4231846983,3.1312196066  
 H, 0.5487938157,-5.0481752795,2.6496505994  
 H, -1.1958210285,-4.7208137677,2.8057000386  
 Cl, -0.1091087371,-4.7596006395,4.9270724499  
 C, 0.7393327772,5.7984774168,1.9377505435  
 C, -0.6554861318,5.8106933649,1.9262666388  
 C, -1.3601524632,4.6259573078,1.7343223367  
 C, -0.6684097045,3.4337600815,1.5270441792  
 C, 0.7491495353,3.4083707631,1.5094400082  
 C, 1.4338765775,4.6099342912,1.7403670666  
 H, 1.2865775359,6.7167897406,2.1173098201  
 H, -1.1951688231,6.7340579568,2.0987073325  
 H, -2.44272874,4.6256016617,1.784210069  
 H, 2.5167144721,4.6018978562,1.7796533115

N, -1.3207796999,2.1939619824,1.3496018166  
N, 1.3107626645,2.1556336253,1.3049203048  
C, -2.5029817346,1.9991310195,0.7933438435  
H, -2.9953768823,2.8862806978,0.4046029348  
C, 2.455931688,1.9814960092,0.7527231179  
H, 3.0550647047,2.8399812459,0.4125478354  
C, -3.1384035456,0.7593141917,0.6134012564  
C, -4.3323519258,0.7204864562,-0.1686995496  
C, -2.5858364928,-0.4669316841,1.1599528656  
C, -4.9690950191,-0.4520348012,-0.4896200563  
H, -4.7173036861,1.6693085367,-0.52439817  
C, -3.2277076111,-1.6781228317,0.7551349116  
C, -4.3576210301,-1.6546362907,-0.0196882182  
H, -2.7614127721,-2.6115154723,1.0393175209  
H, -4.7985286589,-2.6066610296,-0.2961034057  
C, 3.0580966507,0.6880490247,0.4842206376  
C, 4.3870682991,0.6680924122,0.022937199  
C, 2.3574715146,-0.5464996236,0.6205968708  
C, 5.0765454415,-0.5003514515,-0.2870164393  
H, 4.8845065201,1.6274930225,-0.0841196698  
C, 3.0436173929,-1.7283215645,0.2961933823  
C, 4.3615918411,-1.7008610882,-0.1357676732  
H, 2.5113869553,-2.6690164267,0.3852248283  
H, 4.8358465336,-2.6463375272,-0.3665380387  
O, -1.5854304708,-0.4152580898,1.9515909953  
O, 1.0964727239,-0.5409429784,1.0170210253  
H, 0.6565588332,-1.4657811785,1.0864368722  
C, 6.5369332213,-0.4417731825,-0.7711863714  
C, 7.4195012358,0.2132333175,0.3165001874  
H, 8.4619651801,0.263679651,-0.0140437457  
H, 7.0925965764,1.2309658533,0.5432592715  
H, 7.383778604,-0.3626090985,1.2452505327  
C, 7.1061167501,-1.841427976,-1.0679259959  
H, 8.1415852485,-1.7525796987,-1.4077657339  
H, 7.1044246125,-2.4778709419,-0.1787878553  
H, 6.5432309444,-2.350848994,-1.8548897882  
C, 6.6229262979,0.3946521326,-2.0688710304  
H, 6.012392003,-0.0500354681,-2.8593944995  
H, 6.273627592,1.4184571081,-1.9145644995  
H, 7.6571472298,0.4458906751,-2.4241932391  
C, -6.2526467451,-0.5289409802,-1.3299369331  
C, -7.3641912627,-1.2241693885,-0.5094220114  
H, -7.5861179796,-0.6612480737,0.4013013894  
H, -8.283835183,-1.2966292951,-1.098123654

|                                              |                             |
|----------------------------------------------|-----------------------------|
| H, -7.0796318022,-2.2371101387,-0.2146716663 |                             |
| C, -6.7603317648,0.8647524364,-1.7403443207  |                             |
| H, -6.9914262869,1.4850436929,-0.8696977196  |                             |
| H, -6.0322940199,1.3964850469,-2.3593506097  |                             |
| H, -7.6778287686,0.7645433573,-2.3260578251  |                             |
| C, -5.982616187,-1.3421669497,-2.6175538025  |                             |
| H, -5.6553728608,-2.3607113807,-2.3958916591 |                             |
| H, -6.8922674501,-1.4111707512,-3.2220122503 |                             |
| H, -5.2061283365,-0.8667217965,-3.2226997363 |                             |
| H, -0.7684248814,1.3591820329,1.5871187067   |                             |
| Zero-point correction=                       | 0.612967 (Hartree/Particle) |
| Thermal correction to Energy=                | 0.649819                    |
| Thermal correction to Enthalpy=              | 0.650763                    |
| Thermal correction to Gibbs Free Energy=     | 0.541404                    |
| Sum of electronic and zero-point Energies=   | -1998.665088                |
| Sum of electronic and thermal Energies=      | -1998.628236                |
| Sum of electronic and thermal Enthalpies=    | -1998.627292                |
| Sum of electronic and thermal Free Energies= | -1998.736651                |

***cis-H'***

C, -0.2434240107,-2.2569200716,2.0291581176  
 C, -1.530286459,-1.5332899864,2.4408801671  
 H, 0.5910716241,-1.5588112879,2.1528662145  
 H, -1.4260717869,-1.0656311853,3.4196577172  
 H, -2.3841020612,-2.2148539088,2.4668183102  
 O, -0.3257652795,-2.6851678956,0.6922576609  
 C, 0.0117623031,-3.507078463,2.8671344034  
 H, 0.9416270903,-3.9711734574,2.5508170918  
 H, -0.8052158507,-4.2210831867,2.7708855119  
 Cl, 0.1829916425,-3.1529693393,4.6501979763  
 C, 0.7857997889,5.6404248299,1.4697280991  
 C, -0.6122108943,5.6573152435,1.5587932913  
 C, -1.3338602981,4.5029341753,1.2842697885  
 C, -0.6508477827,3.3506075497,0.9000706209  
 C, 0.7675006633,3.3099053093,0.785625337  
 C, 1.4692319176,4.4903624938,1.1035154826  
 H, 1.3452033648,6.5386669267,1.7068922349  
 H, -1.1284769163,6.5567289717,1.8704919178  
 H, -2.4111854801,4.4904492256,1.4055663837  
 H, 2.5516145452,4.4942777265,1.06585554  
 N, -1.2813951565,2.1206662817,0.6220822179  
 N, 1.2524529437,2.0906777296,0.3929797224  
 C, -2.4921544126,1.9307371881,0.1781890636  
 H, -3.0538368275,2.8255385143,-0.0765889482  
 C, 2.4447540795,1.8994891269,-0.0918423021

H, 3.1259338053,2.7527744225,-0.2241856753  
C, -3.1168107032,0.6660266259,-0.0646002114  
C, -4.187660923,0.6457658621,-0.9901054831  
C, -2.7056672937,-0.5469760889,0.5523160682  
C, -4.8086945735,-0.5256957639,-1.3875920285  
H, -4.4919041951,1.5946859158,-1.4136918505  
C, -3.3036362407,-1.7390150626,0.1298526922  
C, -4.3170163614,-1.716034189,-0.8144855835  
H, -2.9302770494,-2.6821260492,0.4978370655  
H, -4.7369374685,-2.6674737529,-1.1197580882  
C, 2.9659818015,0.6472692156,-0.5187943424  
C, 4.3145841312,0.626461915,-0.9629182503  
C, 2.1776675351,-0.5792763404,-0.5395514943  
C, 4.9659433099,-0.5094946796,-1.3964445271  
H, 4.8476020559,1.5738267623,-0.9431217828  
C, 2.8876575617,-1.7449398558,-0.9866115408  
C, 4.2002766605,-1.7069499705,-1.3881118661  
H, 2.3369248358,-2.6796178013,-0.9996013821  
H, 4.6569016153,-2.6344023645,-1.7129735795  
O, -1.7966330723,-0.4415309994,1.5336711093  
O, 0.9536226378,-0.6324382495,-0.2029376902  
H, 0.1692489245,-1.986693561,0.1671422724  
C, 6.434893757,-0.4521567669,-1.8571557055  
C, 7.3284125858,0.0530561069,-0.7006439126  
H, 8.3764281267,0.1026266757,-1.015049222  
H, 7.0314272255,1.0513046729,-0.3699342269  
H, 7.2620379774,-0.6159998983,0.161644012  
C, 6.9616862662,-1.8314926489,-2.2962199445  
H, 8.004186674,-1.7435045753,-2.6153857745  
H, 6.9266979459,-2.5585795761,-1.4801689245  
H, 6.3918220835,-2.2347394006,-3.1378932656  
C, 6.5684336345,0.5122225578,-3.058844899  
H, 5.9560618993,0.1724407916,-3.898630805  
H, 6.2454846778,1.5236021381,-2.8002956206  
H, 7.6092489162,0.5688647917,-3.3951160642  
C, -5.9487968631,-0.5761672526,-2.4176636216  
C, -7.189124267,-1.244781743,-1.7813305607  
H, -7.5374898577,-0.6773814798,-0.9140480571  
H, -8.006594584,-1.2937896541,-2.5065928823  
H, -6.9784912697,-2.2647524671,-1.4515232876  
C, -6.354225757,0.8273276664,-2.9024453521  
H, -6.7096130783,1.4553200056,-2.0803662745  
H, -5.5269360719,1.3417790994,-3.3990926396  
H, -7.1681782465,0.7432616486,-3.6267407494

|                                              |                             |
|----------------------------------------------|-----------------------------|
| C, -5.4923823436,-1.3998416875,-3.6445093423 |                             |
| H, -5.2272103731,-2.4238904254,-3.3715332742 |                             |
| H, -6.2950491496,-1.4511615155,-4.3861275599 |                             |
| H, -4.6189782883,-0.9444701176,-4.1186235623 |                             |
| H, -0.5987703602,1.338649553,0.6514790648    |                             |
| Zero-point correction=                       | 0.617664 (Hartree/Particle) |
| Thermal correction to Energy=                | 0.654195                    |
| Thermal correction to Enthalpy=              | 0.655139                    |
| Thermal correction to Gibbs Free Energy=     | 0.546796                    |
| Sum of electronic and zero-point Energies=   | -1998.732815                |
| Sum of electronic and thermal Energies=      | -1998.696284                |
| Sum of electronic and thermal Enthalpies=    | -1998.695340                |
| Sum of electronic and thermal Free Energies= | -1998.803683                |

### E-18

C, 0.4389597391,2.7070697683,1.3983672909  
 C, 1.4114597862,2.6484904345,0.2153227232  
 H, 0.3107034661,1.7184528907,1.8392444564  
 H, 2.4069472529,2.9548206298,0.5305097022  
 H, 1.0467110992,3.3085749945,-0.5737279595  
 O, -0.83498949,3.1890236635,0.9198218824  
 C, 0.8555549904,3.7088784937,2.4740889833  
 H, 0.0808613659,3.7737189974,3.2335029478  
 H, 1.0423173113,4.6966301734,2.0548228904  
 Cl, 2.3743525554,3.193113435,3.3190466377  
 C, 0.1162994307,-3.6688360966,3.8498769154  
 C, -1.2725326624,-3.7429329333,3.804632442  
 C, -1.9594936671,-3.1905290793,2.7275636901  
 C, -1.2792054434,-2.5601449862,1.6791673982  
 C, 0.1359018588,-2.5312212834,1.6973465018  
 C, 0.8091723418,-3.0691043599,2.8027961221  
 H, 0.6605541688,-4.0718062298,4.6962034407  
 H, -1.82296556,-4.222210199,4.6060656829  
 H, -3.039667112,-3.2648610569,2.6769049397  
 H, 1.8876754803,-2.9754626334,2.8545891122  
 N, -1.9639905902,-2.0090112579,0.5825017803  
 N, 0.8118295591,-1.884881598,0.6472545925  
 C, -2.9868595547,-1.2574218271,0.7920994839  
 H, -3.2962826675,-0.9976907952,1.8082844443  
 C, 1.9046670085,-2.3826813038,0.2169320189  
 H, 2.2950119507,-3.3291763617,0.6176250833  
 C, -3.7583765918,-0.6737710464,-0.2877589874  
 C, -4.8590488925,0.15508529,0.0188613803  
 C, -3.4079741503,-0.8897500712,-1.6406906746

C, -5.6262245783,0.7773130021,-0.9598204159  
H, -5.0998465517,0.2808272613,1.0685248911  
C, -4.1814966341,-0.2739804201,-2.6362825904  
C, -5.251556745,0.5329565761,-2.2998972972  
H, -3.9063578392,-0.4391634313,-3.6709159286  
H, -5.8164815644,0.9910544744,-3.103828182  
C, 2.7578150004,-1.7787709282,-0.8130130042  
C, 4.0655447644,-2.2822139936,-0.9415797945  
C, 2.3677387909,-0.7547578901,-1.6837877294  
C, 4.9856177202,-1.7917717816,-1.8657851589  
H, 4.3492675037,-3.0841953748,-0.2718912836  
C, 3.2545827419,-0.2589596954,-2.629015433  
C, 4.5462085569,-0.7620158402,-2.711257075  
H, 2.9155363222,0.5146238287,-3.307592444  
H, 5.2137724962,-0.3483337189,-3.4576255617  
O, -2.3758299262,-1.6529892681,-2.004897827  
H, -1.91648643,-1.9512808467,-1.1779142648  
O, 1.0508233156,-0.3078138736,-1.7252670673  
C, 6.4201377399,-2.3337010667,-1.9908892583  
C, 6.7085685601,-3.4614678657,-0.9832954046  
H, 7.7368550952,-3.810007634,-1.109102567  
H, 6.60123611,-3.1214559162,0.0503937748  
H, 6.0498819968,-4.3212879653,-1.1334816865  
C, 6.6358380078,-2.8931309773,-3.4163417209  
H, 7.6532132991,-3.2819479025,-3.5205415351  
H, 5.9371925382,-3.7074376208,-3.6261637601  
H, 6.4941049833,-2.1257668683,-4.18089584  
C, 7.4246374888,-1.1867659022,-1.7322542532  
H, 7.3022731877,-0.3698306372,-2.4473519904  
H, 7.2969742373,-0.7741598659,-0.72789629  
H, 8.450819801,-1.5556725312,-1.8209089431  
C, -6.8373578467,1.6732982073,-0.6472638748  
C, -7.0395294403,1.8679669368,0.8663696717  
H, -6.1721977411,2.3416295928,1.3354986045  
H, -7.9016499736,2.516713283,1.0416508721  
H, -7.2317279687,0.9210088303,1.377907888  
C, -6.6373845964,3.0674984863,-1.2867870673  
H, -5.7431436695,3.5581656856,-0.8926374678  
H, -6.5312416613,3.0070881081,-2.372236959  
H, -7.4979775781,3.708899056,-1.0735461478  
C, -8.1162843172,1.0251064479,-1.2265955427  
H, -8.2913074716,0.0423796005,-0.7805112055  
H, -8.9890043888,1.6532705193,-1.0223250744  
H, -8.0472615154,0.8922361561,-2.3089012446



C, 0.6471447081,0.8026947657,-1.0775133758  
O, 1.6302328,1.3277040132,-0.3234655489  
O, -0.4548354336,1.2477465504,-1.2106917937  
C, -1.880299475,2.3466915245,1.0280810863  
O, -1.9140330679,1.3555310104,1.7107608418  
O, -2.8758263884,2.8207644389,0.2794899135  
H, -3.5582245763,2.1299790492,0.2396448634

|                                              |                             |
|----------------------------------------------|-----------------------------|
| Zero-point correction=                       | 0.647550 (Hartree/Particle) |
| Thermal correction to Energy=                | 0.689648                    |
| Thermal correction to Enthalpy=              | 0.690593                    |
| Thermal correction to Gibbs Free Energy=     | 0.568945                    |
| Sum of electronic and zero-point Energies=   | -2375.977989                |
| Sum of electronic and thermal Energies=      | -2375.935890                |
| Sum of electronic and thermal Enthalpies=    | -2375.934946                |
| Sum of electronic and thermal Free Energies= | -2376.056594                |
